# Supplementary material
Source: publisher site journal article supplement (https://www.dovepress.com/article/382692)
Supplement: Supplementary file 1 [file get_supplementary_file.php]

**Supplementary materials**

**Supplementary figures**


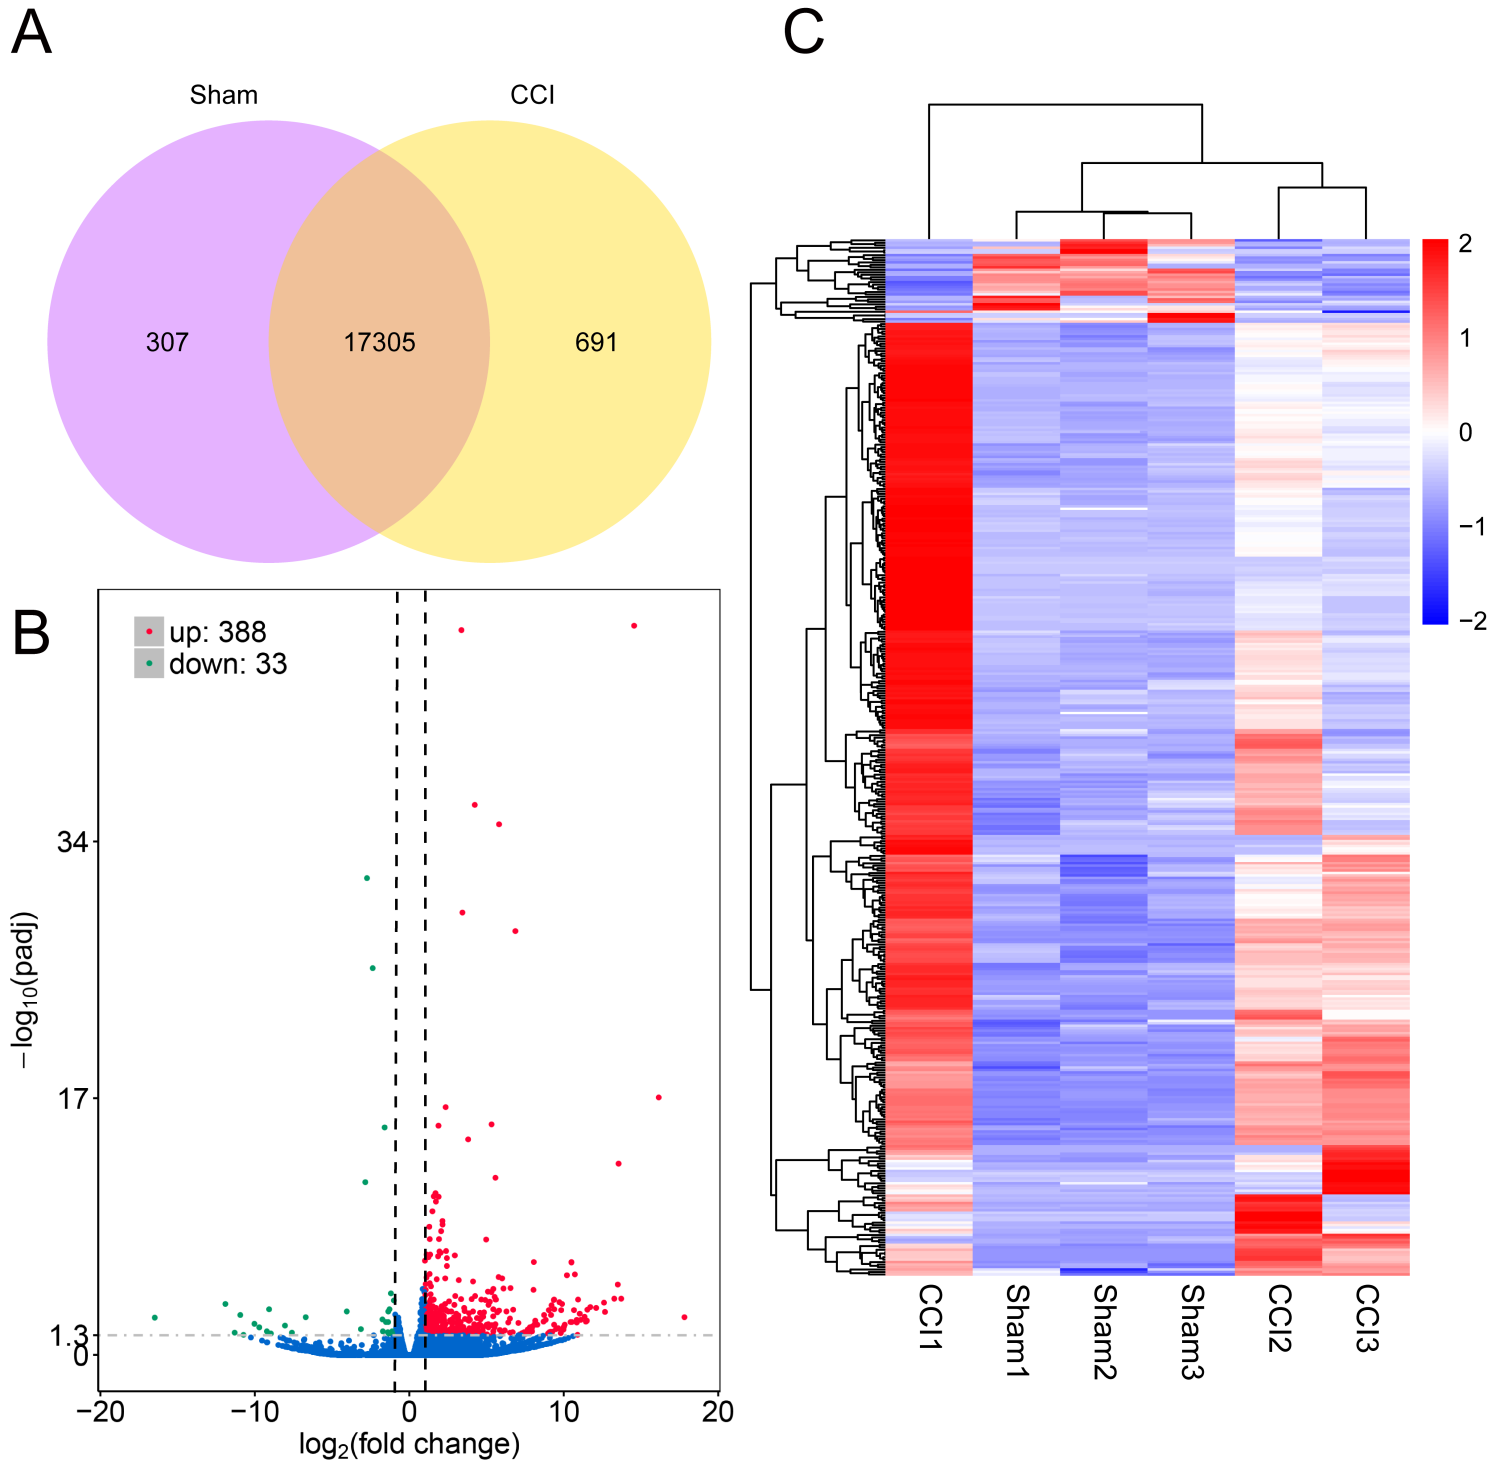


**Supplementary Figure 1 The expression profiling changes of genes encoding mRNAs in the TG of CCI-ION mice.**

(A) The Venn diagram summarizes genes encoding proteins detected in the TG of CCI-ION and Sham groups. (B) The Volcano plot displays the DE genes encoding mRNAs in the CCI-ION group compared with the Sham group. (C) The clustering map shows the DE genes encoding mRNAs in each sample TG of CCI-ION and Sham groups.


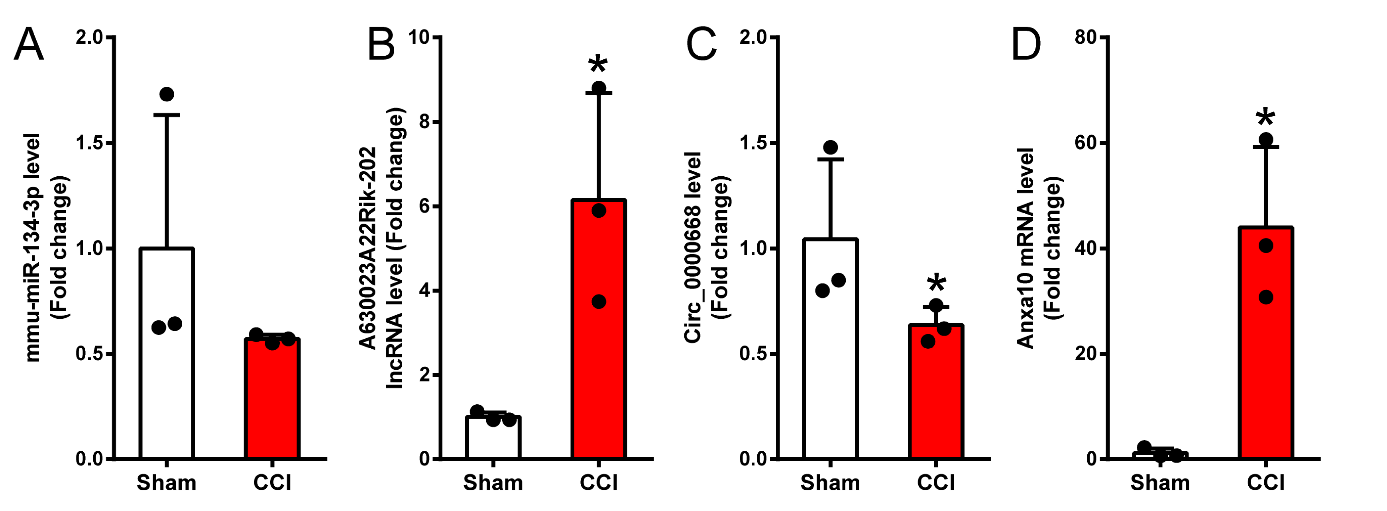


**Supplementary Figure 2 RT-qPCR validation of four regulated ncRNAs in the TG from female Sham and CCI-ION mice.**

The expression level of mmu-miR-134-3p (A), A630023A22Rik-202 lncRNA (B), circ_0000668 (C), and Anxa10 mRNA (D) in the TG of female Sham and CCI-ION mice, *P< 0.05, n = 3.


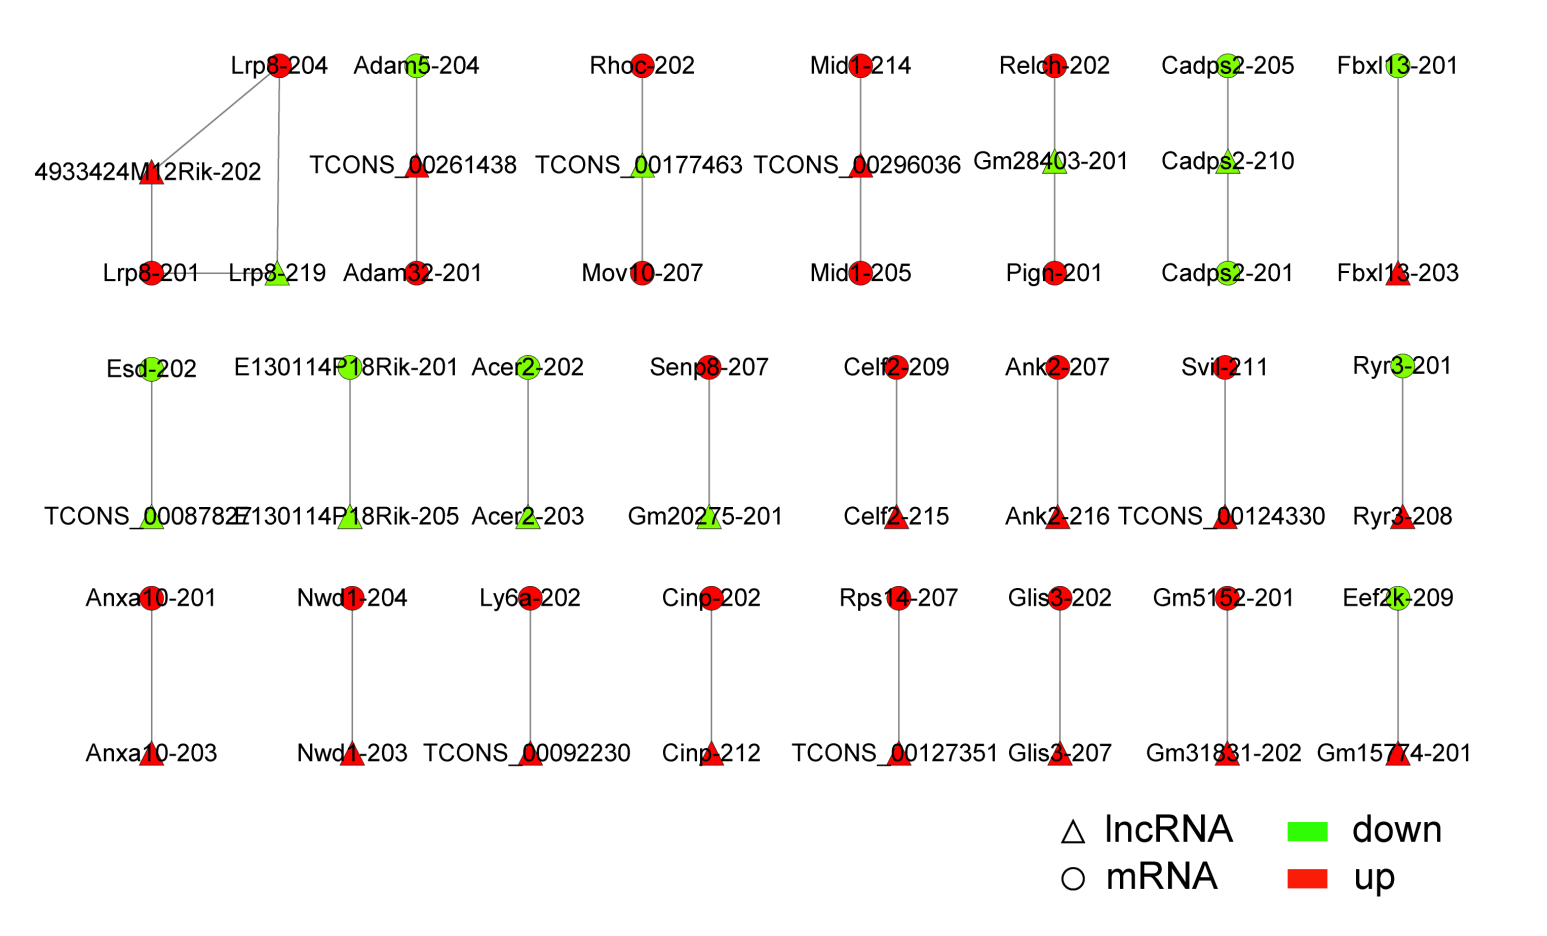


**Supplementary Figure 3 The regulatory network of DE lncRNAs targeting DE mRNAs by co-location.**

Totally, 24 DE lncRNAs were predicted to target 29 DE mRNAs by co-location.


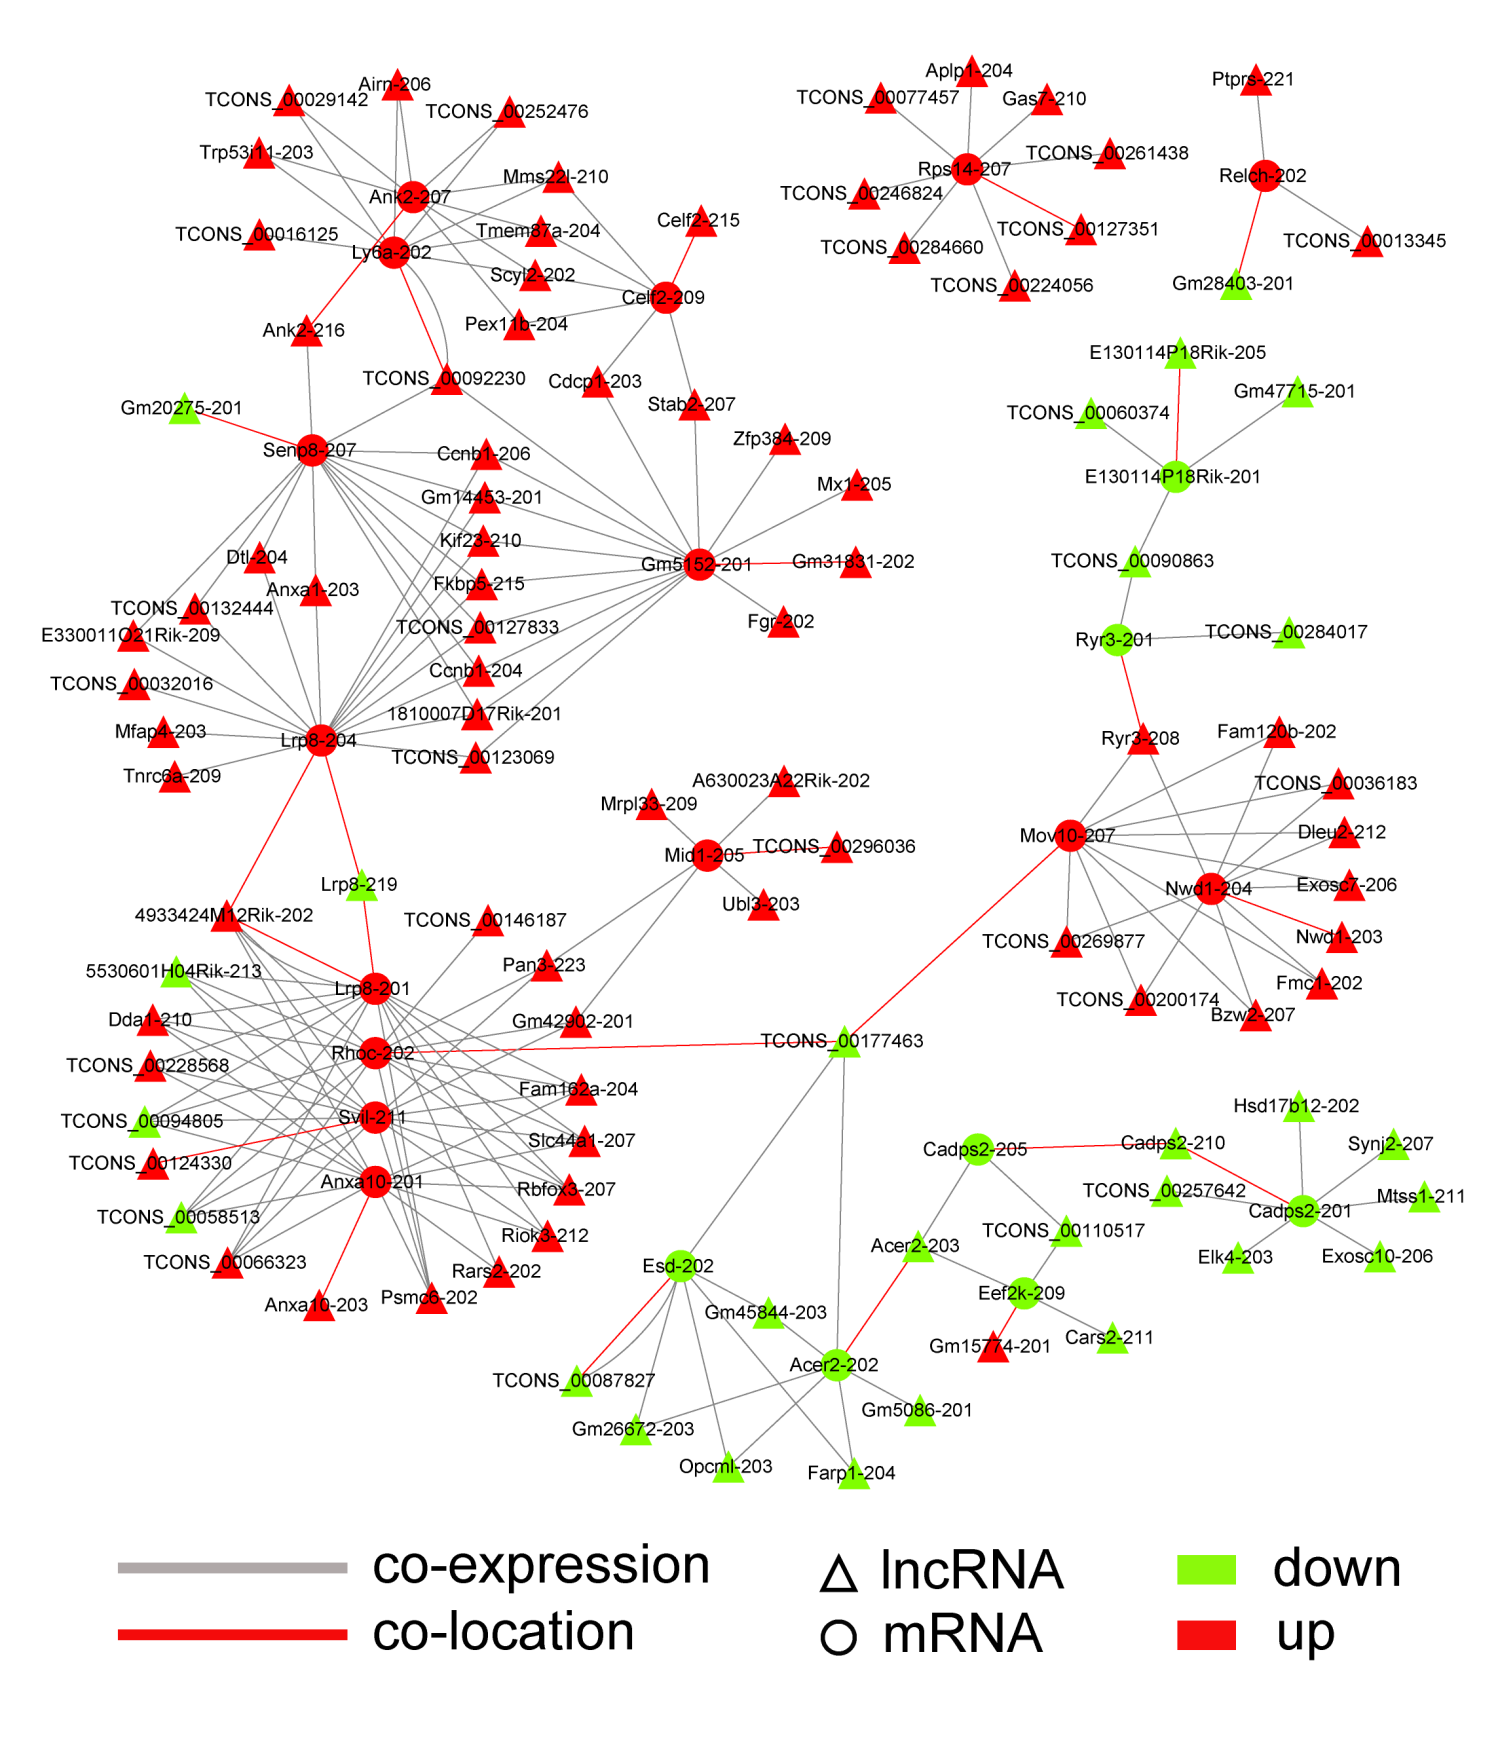


**Supplementary Figure 4 Regulatory network of the targeted DE mRNAs of DE lncRNAs by co-expression and co-location.**

Three DE lncRNAs (Gm20275-201, 4933424M12Rik-202, and TCONS_00087827) were predicted to regulate 3 DE mRNAs (Ly6a-202, Lrp8-201, and Esd-202) by co-expression and co-location simultaneously, respectively.


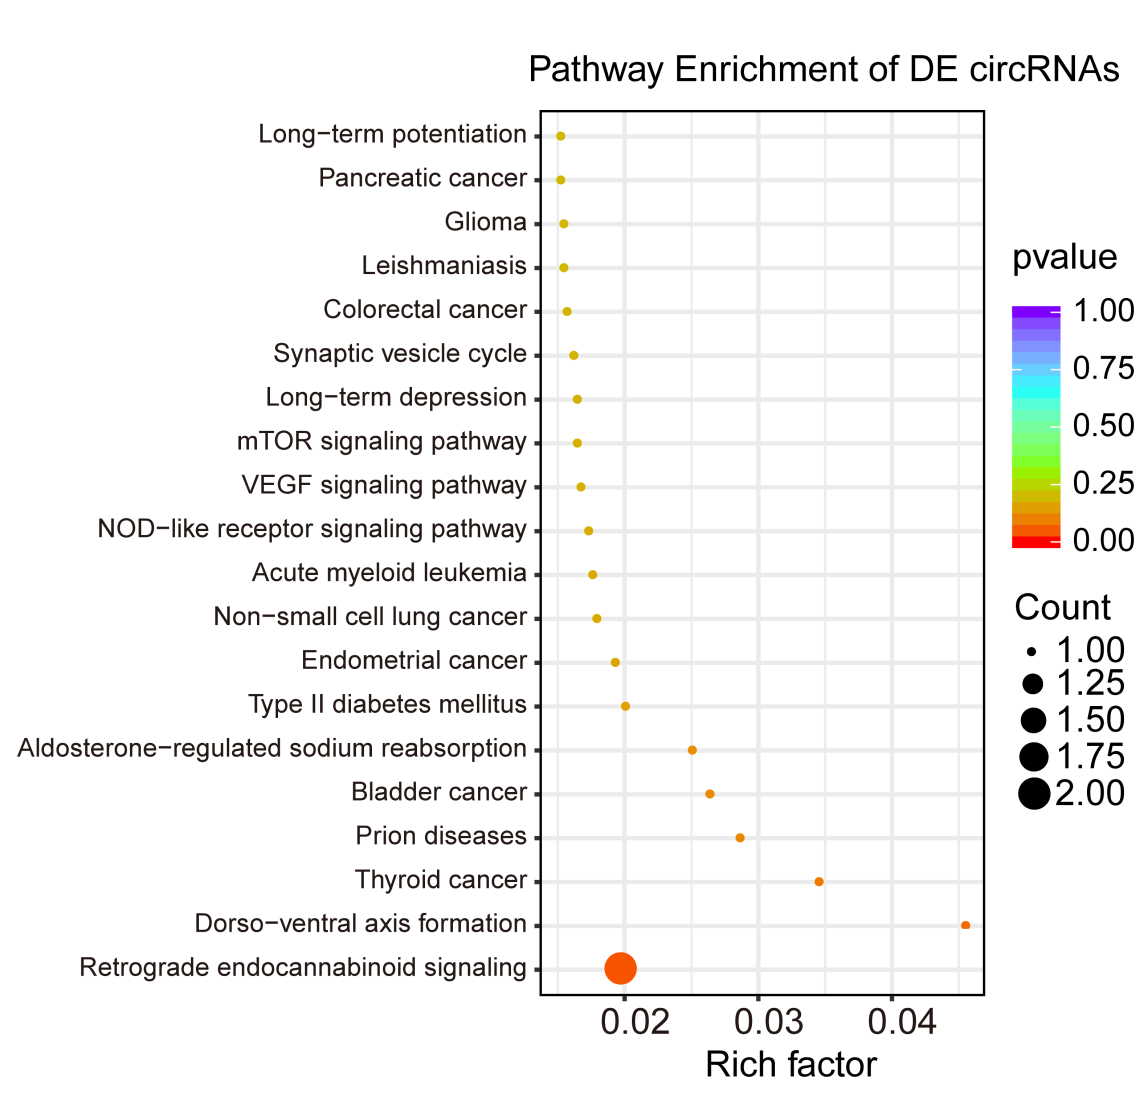


**Supplementary Figure 5 KEGG analysis of source genes of DE circRNAs in the TG of CCI-ION mice.**

The scatter diagram demonstrated that only the retrograde endocannabinoid signaling pathway was significantly enriched.


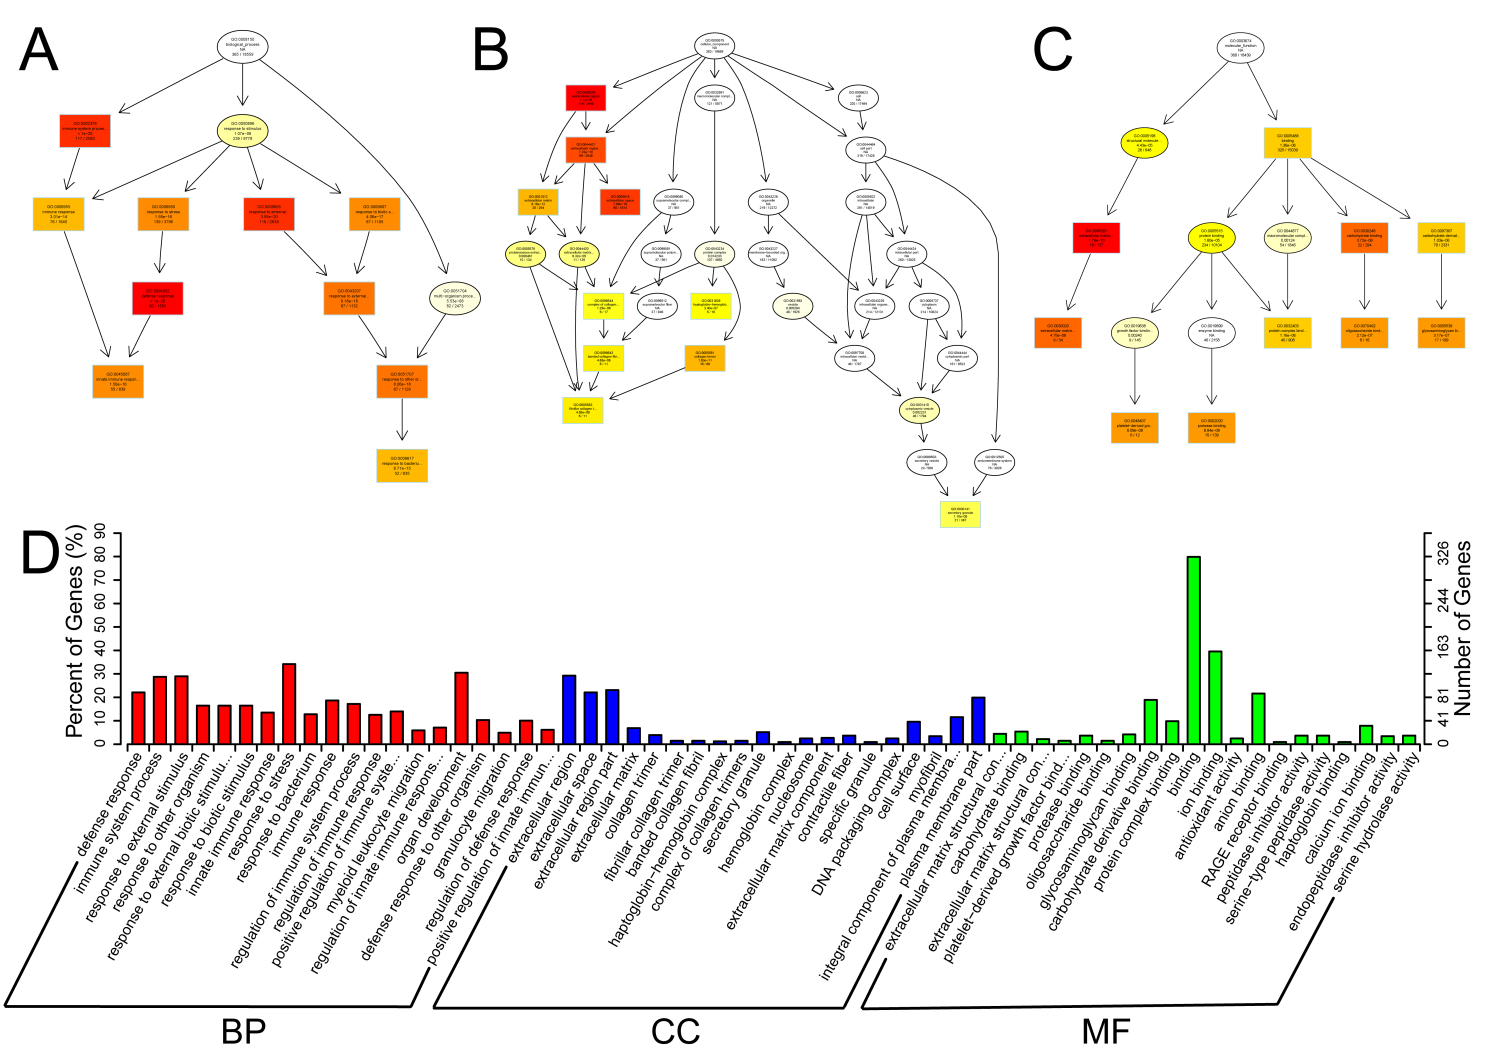


**Supplementary Figure 6 GO analysis of DEGs encoding mRNAs in the TG of CCI-ION mice.**

(A) Directed Acyclic Graph (DAG) displays the relationships of enriched terms of biological process (BP) in the GO enrichment of DEGs based on the top 10 significantly enriched terms (rectangular box). (B) DAG displays the relationships of enriched terms of cellular components (CC). (C) DAG displays the relationships of enriched terms of molecular function (MF). (D) The number and percent of DEGs enriched in the top 20 significantly enriched GO terms of BP, CC, and MF are shown in the histogram.


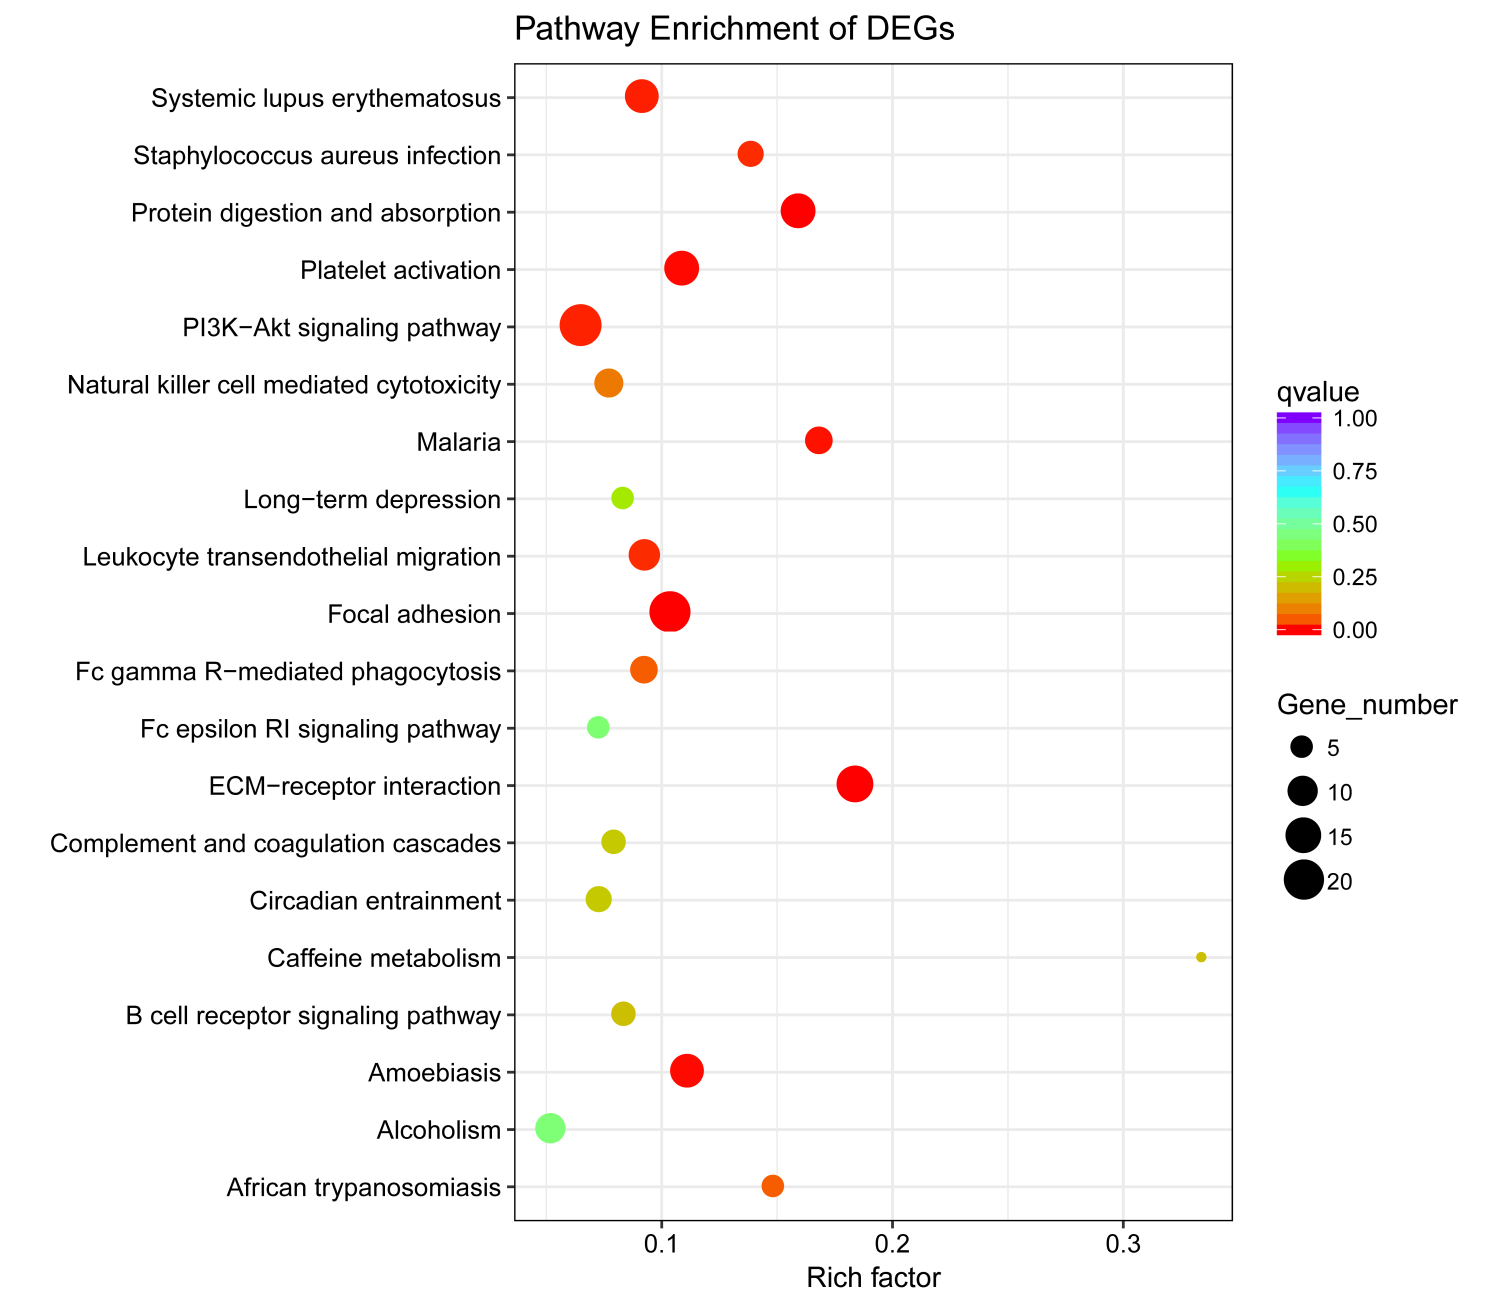


**Supplementary Figure 7 KEGG analysis of DEGs encoding mRNAs in the TG of CCI-ION mice.**

The scatter diagram demonstrates the top 20 enriched signaling pathways of DEGs.


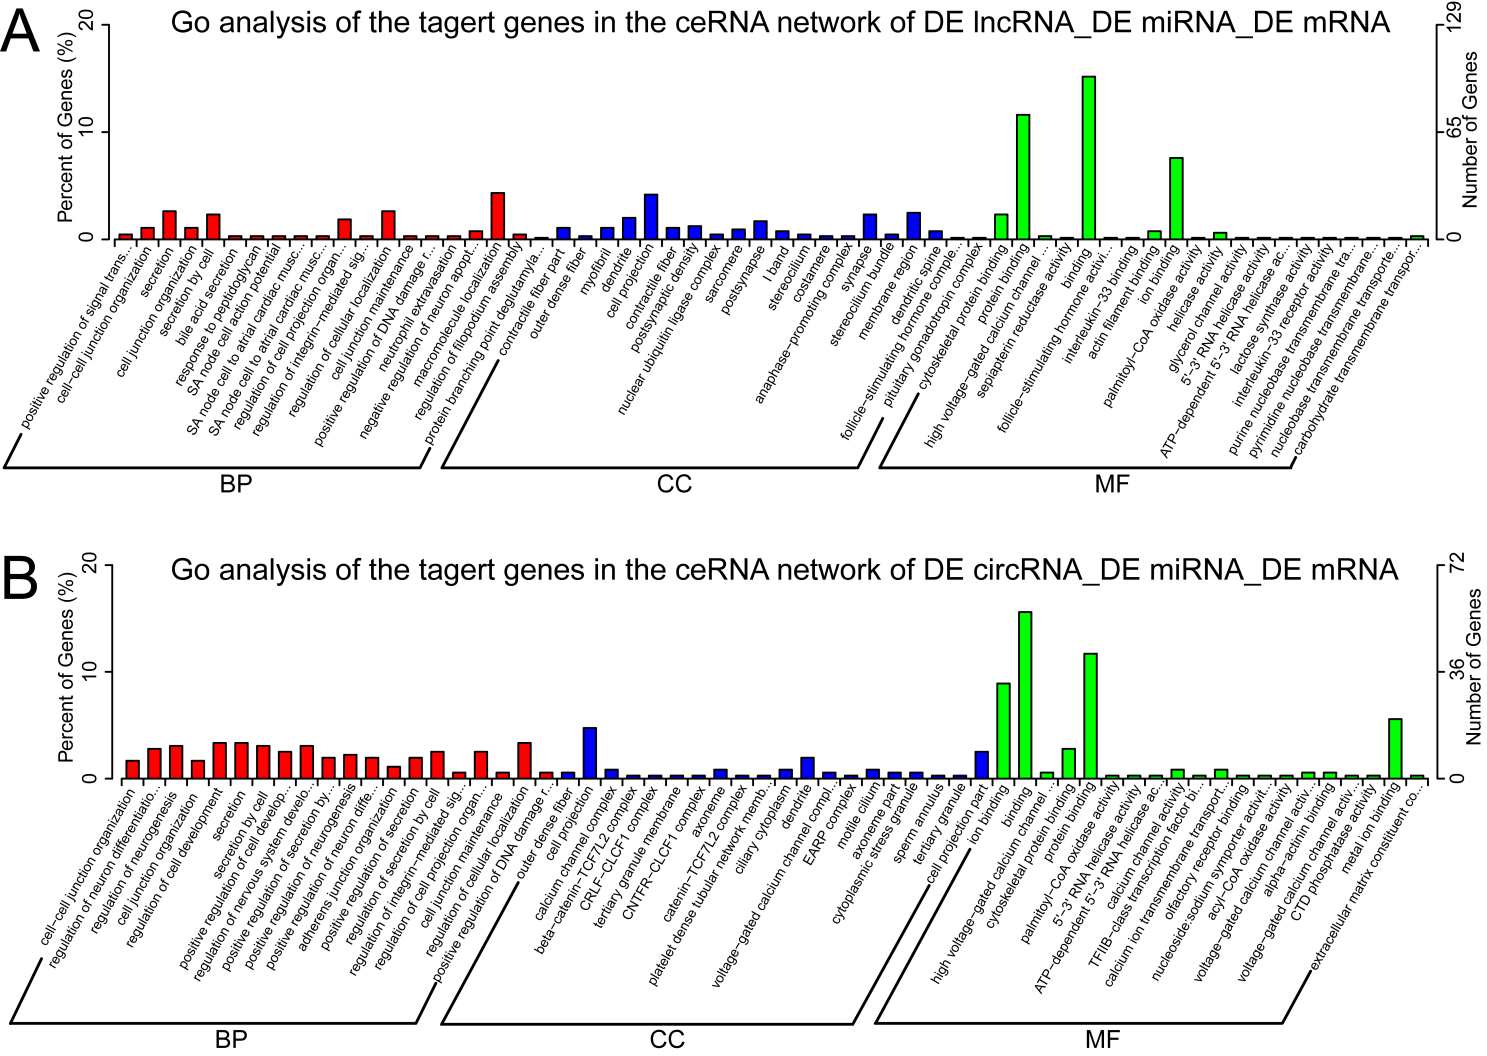


**Supplementary Figure 8** **Go analysis of the target genes in the ceRNA regulatory networks of DE lncRNAs/DE circRNAs, DE miRNAs, and DE mRNAs.**

(A) Go analysis of the target genes in the ceRNA regulatory networks of DE lncRNAs, DE miRNAs, and DE mRNAs, the histogram shows the top 20 significantly enriched GO terms in biological process (BP), cellular component (CC), and molecular function (MF). (B) Go analysis of the target genes in the ceRNA regulatory networks of DE circRNAs, DE miRNAs, and DE mRNAs, the histogram shows the top 20 significantly enriched GO terms in biological process (BP), cellular component (CC), and molecular function (MF).


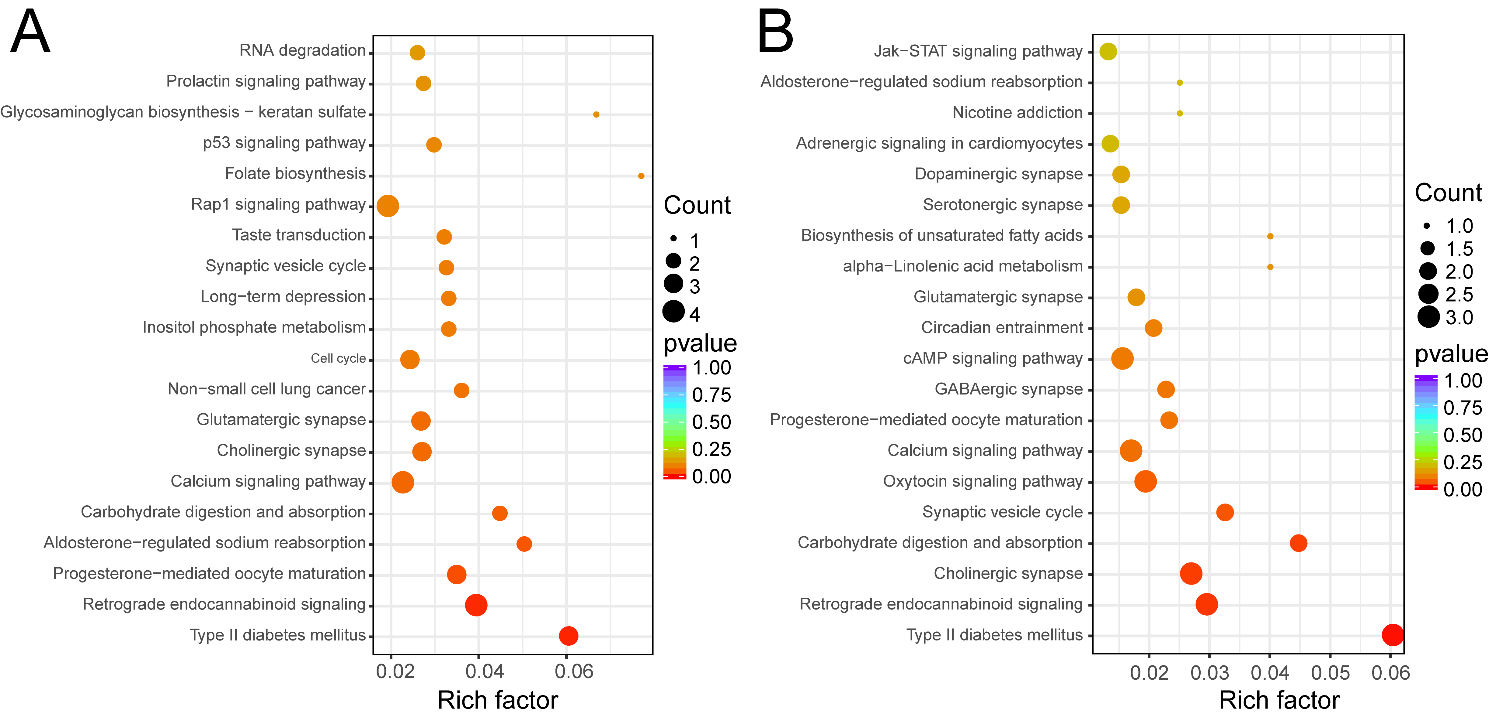


**Supplementary Figure 9 The enriched KEGG pathway scatterplot of the target genes in the DE lncRNA/DE circRNA-DE miRNA-DE mRNA networks.**

(A) The scatterplot shows the top 20 enriched KEGG pathways of the target genes in the DE lncRNA-DE miRNA-DE mRNA network. (B) The scatterplot displays the top 20 enriched KEGG pathways of the target genes in the DE lncRNA-DE miRNA-DE mRNA network.

**Summary of the Supplementary Tables**

| **Table No.** | **Title** |
| --- | --- |
| Supplementary Table 1 | The list of pain genes constructed based on PainNetworks, PainGene databases, and literature curation |
| Supplementary Table 2 | Primers designed for RT-qPCR validation of candidate ncRNAs and mRNA |
| Supplementary Table 3 | The detailed information of the DE miRNAs in the TG of CCI-ION mice |
| Supplementary Table 4 | The detailed information of the DE lncRNAs in the TG of CCI-ION mice |
| Supplementary Table 5 | The detailed information of the DE circRNAs in the TG of CCI-ION mice |
| Supplementary Table 6 | The detailed information of the DE mRNAs in the TG of CCI-ION mice |
| Supplementary Table 7 | The detailed information of the DE genes encoding proteins in the TG of CCI-ION mice |
| Supplementary Table 8 | The list of DE miRNAs involved with pain |
| Supplementary Table 9 | The list of DE miRNAs targeting DE mRNAs |
| Supplementary Table 10 | Pain specific PPI network associated with the DE mRNAs targeted by DE miRNAs in the TG of CCI-ION mice |
| Supplementary Table 11 | The negative regulatory network of DE miRNAs targeting DE mRNAs |
| Supplementary Table 12 | The list of DE lncRNAs targeting DE mRNAs related to pain genes in co-expression |
| Supplementary Table 13 | The list of DE lncRNAs targeting DE mRNAs in co-location |
| Supplementary Table 14 | Pain specific PPI network associated with DEGs in the TG of CCI-ION mice |
| Supplementary Table 15 | The list of protein-encoding DEGs related to pain |
| Supplementary Table 16 | DEGs encoding proteins related to NP, PEP, and LM |

**Supplementary Table 1 The list of pain genes constructed based on PainNetworks, PainGene databases, and literature curation**

| **No.** | **Gene** | **Protein Name** |
| --- | --- | --- |
| 1 | A530088h08rik | RIKEN cDNA A530088H08 gene |
| 2 | Abcb1 | ATP-binding cassette, sub-family B (MDR/TAP), member 1 |
| 3 | Abcb1a | ATP-binding cassette, sub-family B (MDR/TAP), member 1A |
| 4 | Abcc3 | ATP-binding cassette, sub-family C (CFTR/MRP), member 3 |
| 5 | Abcc4 | ATP-binding cassette, sub-family C (CFTR/MRP), member 4 |
| 6 | Accn1 | amiloride-sensitive cation channel 1 |
| 7 | Accn2 | amiloride-sensitive cation channel 2 |
| 8 | Accn3 | amiloride-sensitive cation channel 3 |
| 9 | Ace | angiotensin I converting enzyme (peptidyl-dipeptidase A) 1 |
| 10 | Ace2 | angiotensin I converting enzyme (peptidyl-dipeptidase A) 2 |
| 11 | Ache | acetylcholinesterase |
| 12 | Acpp | acid phosphatase, prostate |
| 13 | Acsl1 | acyl-CoA synthetase long-chain family member 1 |
| 14 | Adam11 | a disintegrin and metallopeptidase domain 11 |
| 15 | Adamts5 | a disintegrin-like and metallopeptidase (reprolysin type) with thrombospondin type 1 motif, 5 |
| 16 | Adcy1 | adenylate cyclase 1 |
| 17 | Adcy5 | adenylate cyclase 5 |
| 18 | Adcy7 | adenylate cyclase 7 |
| 19 | Adcy8 | adenylate cyclase 8 |
| 20 | Adcyap1 | adenylate cyclase activating polypeptide 1 |
| 21 | Adcyap1r1 | adenylate cyclase activating polypeptide 1 receptor 1 |
| 22 | Adm | adrenomedullin |
| 23 | Adora1 | adenosine A1 receptor |
| 24 | Adora2a | adenosine A2a receptor |
| 25 | Adora2b | adenosine A2b receptor |
| 26 | Adora3 | adenosine A3 receptor |
| 27 | Adra1a | adrenoceptor alpha 1A |
| 28 | Adra1b | adrenoceptor alpha 1B |
| 29 | Adra1d | adrenergic receptor, alpha 1d |
| 30 | Adra2a | adrenergic receptor, alpha 2a |
| 31 | Adra2c | adrenergic receptor, alpha 2c |
| 32 | Adrb1 | adrenoceptor beta 1 |
| 33 | Adrb2 | adrenergic receptor, beta 2 |
| 34 | Adrb3 | adrenoceptor beta 3 |
| 35 | Adrbk1 | adrenergic receptor kinase, beta 1 |
| 36 | Adrbk2 | adrenergic receptor kinase, beta 2 |
| 37 | Ager | advanced glycosylation end product-specific receptor |
| 38 | Agpat1 | 1-acylglycerol-3-phosphate O-acyltransferase 1 |
| 39 | Agt | angiotensinogen (serpin peptidase inhibitor, clade A, member 8) |
| 40 | Agtr1 | angiotensin II receptor, type 1 |
| 41 | Agtr2 | angiotensin II receptor, type 2 |
| 42 | Akr1b10 | aldo-keto reductase family 1, member B10 |
| 43 | Alox12 | arachidonate 12-lipoxygenase |
| 44 | Alox5 | arachidonate 5-lipoxygenase |
| 45 | Ano1 | anoctamin 1, calcium activated chloride channel |
| 46 | Anxa1 | annexin A1 |
| 47 | Anxa2 | annexin A2 |
| 48 | Apoe | apolipoprotein E |
| 49 | App | amyloid beta (A4) precursor protein |
| 50 | Aqp1 | aquaporin 1 |
| 51 | Aqp4 | aquaporin 4 |
| 52 | Arl5b | ADP-ribosylation factor-like 5B |
| 53 | Arrb1 | arrestin, beta 1 |
| 54 | Arrb2 | arrestin, beta 2 |
| 55 | Artn | artemin |
| 56 | Asic3 | acid-sensing (proton-gated) ion channel 3 |
| 57 | Atf1 | activating transcription factor 1 |
| 58 | Atf3 | activating transcription factor 3 |
| 59 | Atf6b | activating transcription factor 6 beta |
| 60 | Atp1a1 | ATPase, Na+/K+ transporting, alpha 1 polypeptide |
| 61 | Atp1b3 | ATPase, Na+/K+ transporting, beta 3 polypeptide |
| 62 | Atp2b1 | ATPase, Ca++ transporting, plasma membrane 1 |
| 63 | Atp6v1a | ATPase, H+ transporting, lysosomal 70kDa, V1 subunit A |
| 64 | Atp6v1b2 | ATPase, H+ transporting, lysosomal 56/58kDa, V1 subunit B2 |
| 65 | Atp6v1g2 | ATPase, H+ transporting, lysosomal 13kDa, V1 subunit G2 |
| 66 | Avpr1a | arginine vasopressin receptor 1A |
| 67 | Avpr1b | arginine vasopressin receptor 1B |
| 68 | Avpr2 | arginine vasopressin receptor 2 |
| 69 | Bace1 | beta-site APP cleaving enzyme 1 |
| 70 | Bach1 | "BTB and CNC homology 1, basic leucine zipper transcription factor 1 |
| 71 | Bambi | bone morphogenetic protein and activin membrane-bound inhibitor |
| 72 | Bbs1 | Bardet-Biedl syndrome 1 |
| 73 | Bbs4 | Bardet-Biedl syndrome 4 |
| 74 | Bdkrb1 | bradykinin receptor, beta 1 |
| 75 | Bdkrb2 | bradykinin receptor, beta 2 |
| 76 | Bdnf | brain derived neurotrophic factor |
| 77 | Bhlhe22 | basic helix-loop-helix family, member e22 |
| 78 | Bloc1s6 | biogenesis of lysosomal organelles complex-1, subunit 6 |
| 79 | Btg2 | BTG family, member 2 |
| 80 | C5ar1 | complement component 5a receptor 1 |
| 81 | C6orf15 | chromosome 6 open reading frame 15 |
| 82 | Ca8 | carbonic anhydrase VIII |
| 83 | Cacna1a | calcium channel, voltage-dependent, P/Q type, alpha 1A subunit |
| 84 | Cacna1b | calcium channel, voltage-dependent, N type, alpha 1B subunit |
| 85 | Cacna1e | calcium channel, voltage-dependent, R type, alpha 1E subunit |
| 86 | Cacna1g | calcium channel, voltage-dependent, T type, alpha 1G subunit |
| 87 | Cacna1h | calcium channel, voltage-dependent, T type, alpha 1H subunit |
| 88 | Cacna2d1 | calcium channel, voltage-dependent, alpha2/delta subunit 1 |
| 89 | Cacna2d2 | calcium channel, voltage-dependent, alpha 2/delta subunit 2 |
| 90 | Cacna2d3 | calcium channel, voltage-dependent, alpha 2/delta subunit 3 |
| 91 | Cacna2d4 | calcium channel, voltage-dependent, alpha 2/delta subunit 4 |
| 92 | Cacnb3 | calcium channel, voltage-dependent, beta 3 subunit |
| 93 | Cacng2 | calcium channel, voltage-dependent, gamma 2 subunit |
| 94 | Calb1 | calbindin 1 |
| 95 | Calca | calcitonin/calcitonin-related polypeptide, alpha |
| 96 | Calcb | "calcitonin-related polypeptide, beta |
| 97 | Calcrl | calcitonin receptor-like |
| 98 | Calm2 | calmodulin 2 (phosphorylase kinase, delta) |
| 99 | Camk1 | calcium/calmodulin-dependent protein kinase I |
| 100 | Camk2a | calcium/calmodulin-dependent protein kinase II alpha |
| 101 | Camk2b | calcium/calmodulin-dependent protein kinase II beta |
| 102 | Camk4 | calcium/calmodulin-dependent protein kinase IV |
| 103 | Casp1 | caspase 1 |
| 104 | Casp6 | caspase 6 |
| 105 | Cat | catalase |
| 106 | Ccdc68 | coiled-coil domain containing 68 |
| 107 | Cchcr1 | coiled-coil alpha-helical rod protein 1 |
| 108 | Cck | cholecystokinin |
| 109 | Cckar | cholecystokinin A receptor |
| 110 | Cckbr | cholecystokinin B receptor |
| 111 | Ccl2 | chemokine (C-C motif) ligand 2 |
| 112 | Ccl21a | chemokine (C-C motif) ligand 21A |
| 113 | Ccl3 | chemokine (C-C motif) ligand 3 |
| 114 | Ccl4 | chemokine (C-C motif) ligand 4 |
| 115 | Ccl5 | chemokine (C-C motif) ligand 5 |
| 116 | Ccr1 | chemokine (C-C motif) receptor 1 |
| 117 | Ccr2 | chemokine (C-C motif) receptor 2 |
| 118 | Ccr5 | chemokine (C-C motif) receptor 5 |
| 119 | Ccr7 | chemokine (C-C motif) receptor 7 |
| 120 | Cd14 | CD14 antigen |
| 121 | Cd274 | CD274 antigen |
| 122 | Cd38 | CD38 antigen |
| 123 | Cd4 | CD4 antigen |
| 124 | Cd40 | CD40 antigen |
| 125 | Cd55 | CD55 molecule |
| 126 | Cdk5 | cyclin-dependent kinase 5 |
| 127 | Cdk5r1 | cyclin-dependent kinase 5, regulatory subunit 1 (p35) |
| 128 | Cdkn1a | cyclin-dependent kinase inhibitor 1A |
| 129 | Chrm1 | cholinergic receptor, muscarinic 1 |
| 130 | Chrm2 | cholinergic receptor, muscarinic 2 |
| 131 | Chrm3 | cholinergic receptor, muscarinic 3 |
| 132 | Chrm4 | cholinergic receptor, muscarinic 4 |
| 133 | Chrm5 | cholinergic receptor, muscarinic 5 |
| 134 | Chrna4 | cholinergic receptor, nicotinic, alpha polypeptide 4 |
| 135 | Chrna5 | cholinergic receptor, nicotinic, alpha polypeptide 5 |
| 136 | Chrna6 | cholinergic receptor, nicotinic, alpha 6 (neuronal) |
| 137 | Chrna7 | cholinergic receptor, nicotinic, alpha polypeptide 7 |
| 138 | Chrnb2 | cholinergic receptor, nicotinic, beta polypeptide 2 |
| 139 | Chrnb4 | cholinergic receptor, nicotinic, beta polypeptide 4 |
| 140 | Chuk | conserved helix-loop-helix ubiquitous kinase |
| 141 | Clcn6 | chloride channel, voltage-sensitive 6 |
| 142 | Clock | circadian locomoter output cycles kaput |
| 143 | Cnga3 | cyclic nucleotide gated channel alpha 3 |
| 144 | Cnr1 | cannabinoid receptor 1 |
| 145 | Cnr2 | cannabinoid receptor 2 |
| 146 | Col11a2 | collagen, type XI, alpha 2 |
| 147 | Col9a1 | collagen, type IX, alpha 1 |
| 148 | Comt | catechol-O-methyltransferase |
| 149 | Comt1 | catechol-O-methyltransferase 1 |
| 150 | Coq10a | coenzyme Q10 homolog A (S. cerevisiae) |
| 151 | Cpn1 | carboxypeptidase N, polypeptide 1 |
| 152 | Cpne6 | copine VI |
| 153 | Creb1 | cAMP responsive element binding protein 1 |
| 154 | Crh | corticotropin releasing hormone |
| 155 | Crhbp | corticotropin releasing hormone binding protein |
| 156 | Crhr1 | corticotropin releasing hormone receptor 1 |
| 157 | Crhr2 | corticotropin releasing hormone receptor 2 |
| 158 | Crip2 | cysteine rich protein 2 |
| 159 | Cryaa | crystallin, alpha A |
| 160 | Csf2 | colony stimulating factor 2 |
| 161 | Csf2rb | colony stimulating factor 2 receptor, beta |
| 162 | Csk | c-src tyrosine kinase |
| 163 | Csnk1a1 | casein kinase 1, alpha 1 |
| 164 | Csnk1e | casein kinase 1, epsilon |
| 165 | Ctsb | cathepsin B |
| 166 | Ctsd | cathepsin D |
| 167 | Ctss | cathepsin S |
| 168 | Cttn | cortactin |
| 169 | Ctxn3 | cortexin 3 |
| 170 | Cx3cl1 | chemokine (C-X3-C motif) ligand 1 |
| 171 | Cx3cr1 | chemokine (C-X3-C) receptor 1 |
| 172 | Cxcl5 | chemokine (C-X-C motif) ligand 5 |
| 173 | Cxcr3 | chemokine (C-C-C motif) receptor 3 |
| 174 | Cxcr4 | chemokine (C-X-C motif) receptor 4 |
| 175 | Cybb | cytochrome b-245, beta polypeptide |
| 176 | Cyp19a1 | cytochrome P450, family 19, subfamily a, polypeptide 1 |
| 177 | Cyp2c9 | cytochrome P450, family 2, subfamily C, polypeptide 9 |
| 178 | Cyp2d6 | cytochrome P450, family 2, subfamily D, polypeptide 6 |
| 179 | Cyp2e1 | cytochrome P450, family 2, subfamily E, polypeptide 1 |
| 180 | Cyp3a4 | cytochrome P450, family 3, subfamily A, polypeptide 4 |
| 181 | Dab1 | disabled homolog 1 |
| 182 | Dao | D-amino acid oxidase |
| 183 | Dbh | dopamine beta hydroxylase |
| 184 | Dbi | diazepam binding inhibitor |
| 185 | Ddc | dopa decarboxylase (aromatic L-amino acid decarboxylase) |
| 186 | Ddr1 | discoidin domain receptor tyrosine kinase 1 |
| 187 | Ddx24 | DEAD (Asp-Glu-Ala-Asp) box polypeptide 24 |
| 188 | Dhx16 | DEAH (Asp-Glu-Ala-His) box polypeptide 16 |
| 189 | Dicer1 | Dcr-1 homolog |
| 190 | Disc1 | disrupted in schizophrenia 1 |
| 191 | Dlg2 | discs, large homolog 2 |
| 192 | Dlg4 | discs, large homolog 4 |
| 193 | Dpcr1 | diffuse panbronchiolitis critical region 1 |
| 194 | Dpp4 | dipeptidylpeptidase 4 |
| 195 | Drd1 | dopamine receptor D1 |
| 196 | Drd1a | dopamine receptor D1A |
| 197 | Drd2 | dopamine receptor D2 |
| 198 | Drd3 | dopamine receptor D3 |
| 199 | Drd4 | dopamine receptor D4 |
| 200 | Drd5 | dopamine receptor D5 |
| 201 | Drgx | dorsal root ganglia homeobox |
| 202 | Dtnbp1 | dystrobrevin binding protein 1 |
| 203 | Dusp6 | dual specificity phosphatase 6 |
| 204 | Ece2 | endothelin converting enzyme 2 |
| 205 | Edn1 | endothelin 1 |
| 206 | Ednra | endothelin receptor type A |
| 207 | Ednrb | endothelin receptor type B |
| 208 | Efnb1 | ephrin B1 |
| 209 | Efnb2 | ephrin B2 |
| 210 | Egf | epidermal growth factor |
| 211 | Egfl8 | EGF-like-domain, multiple 8 |
| 212 | Egfr | epidermal growth factor receptor |
| 213 | Egr1 | early growth response 1 |
| 214 | Egr3 | early growth response 3 |
| 215 | Enpp2 | ectonucleotide pyrophosphatase/phosphodiesterase 2 |
| 216 | Epb41l2 | erythrocyte membrane protein band 4.1-like 2 |
| 217 | Ephb1 | EPH receptor B1 |
| 218 | Ephb2 | EPH receptor B2 |
| 219 | Ephb3 | EPH receptor B3 |
| 220 | Ephb4 | EPH receptor B4 |
| 221 | Ephb6 | EPH receptor B6 |
| 222 | Ephx1 | epoxide hydrolase 1, microsomal (xenobiotic) |
| 223 | Ephx2 | epoxide hydrolase 2, cytoplasmic |
| 224 | Erbb2 | v-erb-b2 erythroblastic leukemia viral oncogene homolog 2 |
| 225 | Erbb4 | v-erb-a erythroblastic leukemia viral oncogene homolog 4 |
| 226 | Ereg | epiregulin |
| 227 | Esr1 | estrogen receptor 1 (alpha) |
| 228 | Esr2 | estrogen receptor 2 (beta) |
| 229 | Etv1 | ets variant 1 |
| 230 | Ezr | ezrin |
| 231 | F2r | coagulation factor II (thrombin) receptor |
| 232 | F2rl1 | coagulation factor II (thrombin) receptor-like 1 |
| 233 | F2rl2 | coagulation factor II (thrombin) receptor-like 2 |
| 234 | F2rl3 | coagulation factor II (thrombin) receptor-like 3 |
| 235 | Faah | fatty acid amide hydrolase |
| 236 | Fabp7 | fatty acid binding protein 7 |
| 237 | Fam19a4 | family with sequence similarity 19, member A4 |
| 238 | Fgf2 | fibroblast growth factor 2 |
| 239 | Fkbp5 | FK506 binding protein 5 |
| 240 | Fkbpl | FK506 binding protein like |
| 241 | Flot1 | flotillin 1 |
| 242 | Flrt3 | fibronectin leucine rich transmembrane protein 3 |
| 243 | Fmr1 | fragile X mental retardation syndrome 1 homolog |
| 244 | Fos | FBJ murine osteosarcoma viral oncogene homolog |
| 245 | Fosb | FBJ osteosarcoma oncogene B |
| 246 | Foxn1 | forkhead box N1 |
| 247 | Fpr2 | formyl peptide receptor 2 |
| 248 | Frmpd4 | FERM and PDZ domain containing 4 |
| 249 | Fstl1 | follistatin-like 1 |
| 250 | Fxyd7 | FXYD domain-containing ion transport regulator 7 |
| 251 | Fyn | Fyn proto-oncogene |
| 252 | Gabarapl1 | GABA(A) receptor-associated protein like 1 |
| 253 | Gabbr1 | gamma-aminobutyric acid (GABA-B) receptor 1 |
| 254 | Gabbr2 | gamma-aminobutyric acid (GABA-B) receptor 2 |
| 255 | Gabra2 | gamma-aminobutyric acid (GABA) A receptor, alpha 2 |
| 256 | Gabra4 | gamma-aminobutyric acid (GABA) A receptor, alpha 4 |
| 257 | Gabra6 | gamma-aminobutyric acid (GABA) A receptor, alpha 6 |
| 258 | Gabrb1 | gamma-aminobutyric acid (GABA) A receptor, beta 1 |
| 259 | Gabrb2 | gamma-aminobutyric acid (GABA) A receptor, beta 2 |
| 260 | Gabrb3 | gamma-aminobutyric acid (GABA-A) receptor, subunit beta 3 |
| 261 | Gabrd | gamma-aminobutyric acid (GABA-A) receptor, subunit delta |
| 262 | Gabrg2 | gamma-aminobutyric acid (GABA-A) receptor, subunit gamma 2 |
| 263 | Gabrg3 | gamma-aminobutyric acid (GABA) A receptor, gamma 3 |
| 264 | Gabrr1 | gamma-aminobutyric acid (GABA-C) receptor, subunit rho 1 |
| 265 | Gad1 | glutamate decarboxylase 1 |
| 266 | Gad2 | glutamic acid decarboxylase 2 |
| 267 | Gadd45a | growth arrest and DNA-damage-inducible 45 alpha |
| 268 | Gal | galanin |
| 269 | Galr1 | galanin receptor 1 |
| 270 | Galr2 | galanin receptor 2 |
| 271 | Galr3 | galanin receptor 3 |
| 272 | Gap43 | growth associated protein 43 |
| 273 | Gbp1 | guanylate binding protein 1, interferon-inducible |
| 274 | Gbp2 | guanylate binding protein 2, interferon-inducible |
| 275 | Gch1 | GTP cyclohydrolase 1 |
| 276 | Gdnf | glial cell derived neurotrophic factor |
| 277 | Gfap | glial fibrillary acidic protein |
| 278 | Gfra2 | glial cell line derived neurotrophic factor family receptor alpha 2 |
| 279 | Gh1 | growth hormone 1 |
| 280 | Ghr | growth hormone receptor |
| 281 | Ghrhr | growth hormone releasing hormone receptor |
| 282 | Gja1 | gap junction protein, alpha 1 |
| 283 | Gla | galactosidase, alpha |
| 284 | Glra1 | glycine receptor, alpha 1 |
| 285 | Glra2 | glycine receptor, alpha 2 subunit |
| 286 | Glra3 | glycine receptor, alpha 3 subunit |
| 287 | Glra4 | glycine receptor, alpha 4 |
| 288 | Glrb | glycine receptor, beta |
| 289 | Gnao1 | guanine nucleotide binding protein, alpha o |
| 290 | Gnaq | guanine nucleotide binding protein, alpha q |
| 291 | Gnaz | guanine nucleotide binding protein, alpha z |
| 292 | Gnb2l1 | guanine nucleotide binding protein (G protein), beta polypeptide 2-like 1 |
| 293 | Gnb3 | guanine nucleotide binding protein (G protein), beta polypeptide 3 |
| 294 | Gng5 | guanine nucleotide binding protein (G protein), gamma 5 |
| 295 | Gpr151 | G protein-coupled receptor 151 |
| 296 | Gpr3 | G protein-coupled receptor 3 |
| 297 | Gpr55 | G protein-coupled receptor 55 |
| 298 | Gpr84 | G protein-coupled receptor 84 |
| 299 | Gpsm3 | G-protein signaling modulator 3 |
| 300 | Gpx4 | glutathione peroxidase 4 |
| 301 | Grasp | GRP1 (general receptor for phosphoinositides 1)-associated scaffold protein |
| 302 | Gria1 | glutamate receptor, ionotropic, AMPA1 (alpha 1) |
| 303 | Gria2 | glutamate receptor, ionotropic, AMPA2 (alpha 2) |
| 304 | Gria3 | glutamate receptor, ionotropic, AMPA 3 |
| 305 | Gria4 | glutamate receptor, ionotropic, AMPA 4 |
| 306 | Grik1 | glutamate receptor, ionotropic, kainate 1 |
| 307 | Grin1 | glutamate receptor, ionotropic, NMDA1 (zeta 1) |
| 308 | Grin2a | glutamate receptor, ionotropic, NMDA2A (epsilon 1) |
| 309 | Grin2b | glutamate receptor, ionotropic, NMDA2B (epsilon 2) |
| 310 | Grin2d | glutamate receptor, ionotropic, NMDA2D (epsilon 4) |
| 311 | Grin3a | glutamate receptor, ionotropic, NMDA3A |
| 312 | Grin3b | glutamate receptor, ionotropic, N-methyl-D-aspartate 3B |
| 313 | Grk4 | G protein-coupled receptor kinase 4 |
| 314 | Grk5 | G protein-coupled receptor kinase 5 |
| 315 | Grk6 | G protein-coupled receptor kinase 6 |
| 316 | Grk7 | G protein-coupled receptor kinase 7 |
| 317 | Grm1 | glutamate receptor, metabotropic 1 |
| 318 | Grm2 | glutamate receptor, metabotropic 2 |
| 319 | Grm4 | glutamate receptor, metabotropic 4 |
| 320 | Grm5 | glutamate receptor, metabotropic 5 |
| 321 | Grn | granulin |
| 322 | Grp | gastrin-releasing peptide |
| 323 | Gstt1 | glutathione S-transferase theta 1 |
| 324 | Gtf2h4 | general transcription factor IIH, polypeptide 4, 52kDa |
| 325 | Gucy1b3 | guanylate cyclase 1, soluble, beta 3 |
| 326 | H2-ab1 | histocompatibility 2, class II antigen A, beta 1 |
| 327 | Hcn1 | hyperpolarization-activated, cyclic nucleotide-gated K+ 1 |
| 328 | Hcn2 | hyperpolarization-activated, cyclic nucleotide-gated K+ 2 |
| 329 | Hcrt | hypocretin |
| 330 | Hdac4 | histone deacetylase 4 |
| 331 | Hdc | histidine decarboxylase |
| 332 | Hif1a | hypoxia inducible factor 1, alpha subunit |
| 333 | Hint1 | histidine triad nucleotide binding protein 1 |
| 334 | Hmgb1 | high mobility group box 1 |
| 335 | Hmox2 | heme oxygenase (decycling) 2 |
| 336 | Hn1 | hematological and neurological expressed 1 |
| 337 | Hnrnpd | heterogeneous nuclear ribonucleoprotein D |
| 338 | Hnrnpu | heterogeneous nuclear ribonucleoprotein U |
| 339 | Hoxb8 | homeobox B8 |
| 340 | Hrh1 | histamine receptor H1 |
| 341 | Hrh2 | histamine receptor H2 |
| 342 | Hrh3 | histamine receptor H3 |
| 343 | Hsd17b8 | hydroxysteroid (17-beta) dehydrogenase 8 |
| 344 | Hsp90ab1 | heat shock protein 90kDa alpha (cytosolic), class B member 1 |
| 345 | Hspa8 | heat shock 70kDa protein 8 |
| 346 | Hspa9 | heat shock 70kDa protein 9 |
| 347 | Hspb1 | heat shock protein 1 |
| 348 | Htr1a | 5-hydroxytryptamine (serotonin) receptor 1A |
| 349 | Htr1b | 5-hydroxytryptamine (serotonin) receptor 1B |
| 350 | Htr2a | 5-hydroxytryptamine (serotonin) receptor 2A |
| 351 | Htr2b | 5-hydroxytryptamine (serotonin) receptor 2B, G protein-coupled |
| 352 | Htr2c | 5-hydroxytryptamine (serotonin) receptor 2C, G protein-coupled |
| 353 | Htr3a | 5-hydroxytryptamine (serotonin) receptor 3A |
| 354 | Htr3b | 5-hydroxytryptamine (serotonin) receptor 3B, ionotropic |
| 355 | Htr3e | 5-hydroxytryptamine (serotonin) receptor 3E, ionotropic |
| 356 | Iapp | islet amyloid polypeptide |
| 357 | Ica1 | islet cell autoantigen 1 |
| 358 | Ido1 | indoleamine 2,3-dioxygenase 1 |
| 359 | Ier3 | immediate early response 3 |
| 360 | Ifng | interferon gamma |
| 361 | Ifngr1 | interferon gamma receptor 1 |
| 362 | Ifrd1 | interferon-related developmental regulator 1 |
| 363 | Igf1 | insulin-like growth factor 1 |
| 364 | Ikbkap | inhibitor of kappa light polypeptide gene enhancer in B-cells, kinase complex-associated protein |
| 365 | Ikbkb | inhibitor of kappa light polypeptide gene enhancer in B-cells, kinase beta |
| 366 | Ikbke | inhibitor of kappaB kinase epsilon |
| 367 | Il1 | interleukin 1 complex |
| 368 | Il10 | interleukin 10 |
| 369 | Il13 | interleukin 13 |
| 370 | Il17a | interleukin 17A |
| 371 | Il18 | interleukin 18 |
| 372 | Il1a | interleukin 1, alpha |
| 373 | Il1b | interleukin 1, beta |
| 374 | Il1r1 | interleukin 1 receptor, type 1 |
| 375 | Il1rap | interleukin 1 receptor accessory protein |
| 376 | Il1rl1 | interleukin 1 receptor-like 1 |
| 377 | Il1rn | interleukin 1 receptor antagonist |
| 378 | Il2 | interleukin 2 |
| 379 | Il21r | interleukin 21 receptor |
| 380 | Il22ra1 | interleukin 22 receptor, alpha 1 |
| 381 | Il22ra2 | interleukin 22 receptor, alpha 2 |
| 382 | Il2ra | interleukin 2 receptor, alpha |
| 383 | Il2rb | interleukin 2 receptor, beta |
| 384 | Il31ra | interleukin 31 receptor A |
| 385 | Il33 | interleukin 33 |
| 386 | Il4 | interleukin 4 |
| 387 | Il5 | interleukin 5 (colony-stimulating factor, eosinophil) |
| 388 | Il6 | interleukin 6 |
| 389 | Il6st | interleukin 6 signal transducer |
| 390 | Il7r | interleukin 7 receptor |
| 391 | Il8 | interleukin 8 |
| 392 | Inadl | InaD-like (Drosophila) |
| 393 | Irf8 | interferon regulatory factor 8 |
| 394 | Itga7 | integrin alpha 7 |
| 395 | Itgam | integrin, alpha M (complement component 3 receptor 3 subunit) |
| 396 | Itpr1 | inositol 1,4,5-triphosphate receptor 1 |
| 397 | Jun | jun proto-oncogene |
| 398 | Kcna1 | potassium voltage-gated channel, shaker-related subfamily, member 1 |
| 399 | Kcna2 | potassium voltage-gated channel, shaker-related subfamily, member 2 |
| 400 | Kcnd2 | potassium voltage-gated channel, Shal-related family, member 2 |
| 401 | Kcnip3 | Kv channel interacting protein 3 |
| 402 | Kcnj11 | potassium inwardly-rectifying channel, subfamily J, member 11 |
| 403 | Kcnj3 | potassium inwardly-rectifying channel, subfamily J, member 3 |
| 404 | Kcnj5 | potassium inwardly-rectifying channel, subfamily J, member 5 |
| 405 | Kcnj6 | potassium inwardly-rectifying channel, subfamily J, member 6 |
| 406 | Kcnj8 | potassium inwardly-rectifying channel, subfamily J, member 8 |
| 407 | Kcnj9 | potassium inwardly-rectifying channel, subfamily J, member 9 |
| 408 | Kcnk10 | potassium channel, subfamily K, member 10 |
| 409 | Kcnk18 | potassium channel, subfamily K, member 18 |
| 410 | Kcnk2 | potassium channel, subfamily K, member 2 |
| 411 | Kcnk3 | potassium channel, subfamily K, member 3 |
| 412 | Kcnk9 | potassium channel, subfamily K, member 9 |
| 413 | Kcnq2 | potassium voltage-gated channel, subfamily Q, member 2 |
| 414 | Kcns1 | potassium voltage-gated channel, delayed-rectifier, subfamily S, member 1 |
| 415 | Kcnt1 | potassium channel, subfamily T, member 1 |
| 416 | Kctd17 | potassium channel tetramerisation domain containing 17 |
| 417 | Kif1a | kinesin family member 1A |
| 418 | Kit | kit oncogene |
| 419 | Klf11 | Kruppel-like factor 11 |
| 420 | Klf6 | Kruppel-like factor 6 |
| 421 | Klf7 | Kruppel-like factor 7 |
| 422 | Klk1 | kallikrein 1 |
| 423 | Klkb1 | kallikrein B, plasma (Fletcher factor) 1 |
| 424 | Kras | v-Ki-ras2 Kirsten rat sarcoma viral oncogene homolog |
| 425 | L1cam | L1 cell adhesion molecule |
| 426 | Lama4 | laminin, alpha4 |
| 427 | Lcn2 | lipocalin 2 |
| 428 | Lep | leptin |
| 429 | Lepr | leptin receptor |
| 430 | Lgals1 | lectin, galactose binding, soluble 1 |
| 431 | Lipm | lipase, family member M |
| 432 | Lmx1b | LIM homeobox transcription factor 1 beta |
| 433 | Lpar1 | lysophosphatidic acid receptor 1 |
| 434 | Lpar3 | lysophosphatidic acid receptor 3 |
| 435 | Lpar5 | lysophosphatidic acid receptor 5 |
| 436 | Lrp1 | low density lipoportein receptor-related protein 1 |
| 437 | Lst1 | leukocyte specific transcript 1 |
| 438 | Lta | lymphotoxin alpha (TNF superfamily, member 1) |
| 439 | Ltb | lymphotoxin beta (TNF superfamily, member 3) |
| 440 | Ltb4r1 | leukotriene B4 receptor 1 |
| 441 | Lxn | latexin |
| 442 | Lyn | Yamaguchi sarcoma viral (v-yes-1) oncogene homolog |
| 443 | Lynx1 | Ly6/neurotoxin 1 |
| 444 | Lyst | lysosomal trafficking regulator |
| 445 | Maoa | monoamine oxidase A |
| 446 | Maob | monoamine oxidase B |
| 447 | Map2k1 | mitogen activated protein kinase kinase 1 |
| 448 | Map2k3 | mitogen activated protein kinase kinase 3 |
| 449 | Map3k8 | mitogen activated protein kinase kinase kianse 8 |
| 450 | Mapk1 | mitogen-activated protein kinase 1 |
| 451 | Mapk10 | mitogen activated protein kinase 10 |
| 452 | Mapk11 | mitogen-activated protein kinase 11 |
| 453 | Mapk13 | mitogen-activated protein kinase 13 |
| 454 | Mapk14 | mitogen-activated protein kinase 14 |
| 455 | Mapk3 | mitogen activated protein kinase 3 |
| 456 | Mapk8 | mitogen activated protein kinase 8 |
| 457 | Mapk9 | mitogen activated protein kinase 9 |
| 458 | Mapt | microtubule-associated protein tau |
| 459 | Mc1r | melanocortin 1 receptor |
| 460 | Mc4r | melanocortin 4 receptor |
| 461 | Mccd1 | mitochondrial coiled-coil domain 1 |
| 462 | Mcf2l | MCF.2 cell line derived transforming sequence-like |
| 463 | Mdc1 | mediator of DNA-damage checkpoint 1 |
| 464 | Mecp2 | methyl CpG binding protein 2 (Rett syndrome) |
| 465 | Mgll | monoglyceride lipase |
| 466 | Mica | MHC class I polypeptide-related sequence A |
| 467 | Micb | MHC class I polypeptide-related sequence B |
| 468 | Mif | macrophage migration inhibitory factor |
| 469 | Mme | membrane metallo endopeptidase |
| 470 | Mmp24 | matrix metalloproteinase 24 |
| 471 | Mmp9 | matrix metalloproteinase 9 |
| 472 | Mpdz | multiple PDZ domain protein |
| 473 | Mpo | myeloperoxidase |
| 474 | Mpz | myelin protein zero |
| 475 | Mrgprb4 | MAS-related GPR, member B4 |
| 476 | Mrgprd | MAS-related GPR, member D |
| 477 | Mrgpre | MAS-related GPR, member E |
| 478 | Msn | moesin |
| 479 | Mtap6 | microtubule-associated protein 6 |
| 480 | Mtdh | metadherin |
| 481 | Mthfr | methylenetetrahydrofolate reductase (NAD(P)H) |
| 482 | Muc21 | mucin 21, cell surface associated |
| 483 | Myd88 | myeloid differentiation primary response gene 88 |
| 484 | Nav2 | neuron navigator 2 |
| 485 | Nbl1 | neuroblastoma, suppression of tumorigenicity 1 |
| 486 | Ncam1 | neural cell adhesion molecule 1 |
| 487 | Ncr3 | natural cytotoxicity triggering receptor 3 |
| 488 | Ndn | necdin |
| 489 | Nedd4l | neural precursor cell expressed, developmentally down-regulated gene 4-like |
| 490 | Nefh | neurofilament, heavy polypeptide |
| 491 | Nf1 | neurofibromatosis 1 |
| 492 | Nfe2l2 | nuclear factor, erythroid derived 2, like 2 |
| 493 | Nfil3 | nuclear factor, interleukin 3 |
| 494 | Nfkb1 | nuclear factor of kappa light polypeptide gene enhancer in B-cells 1 |
| 495 | Nfkbia | nuclear factor of kappa light polypeptide gene enhancer in B-cells inhibitor, alpha |
| 496 | Nfkbil1 | nuclear factor of kappa light polypeptide gene enhancer in B-cells inhibitor-like 1 |
| 497 | Nfkbiz | nuclear factor of kappa light polypeptide gene enhancer in B-cells inhibitor, zeta |
| 498 | Ngf | nerve growth factor |
| 499 | Ngfr | nerve growth factor receptor (TNFR superfamily, member 16) |
| 500 | Nlgn2 | neuroligin 2 |
| 501 | Nlrp3 | NLR family, pyrin domain containing 3 |
| 502 | Nmu | neuromedin U |
| 503 | Nmur2 | neuromedin U receptor 2 |
| 504 | Nos1 | nitric oxide synthase 1 |
| 505 | Nos2 | nitric oxide synthase 2 |
| 506 | Nos3 | nitric oxide synthase 3 |
| 507 | Notch4 | notch 4 |
| 508 | Nova1 | neuro-oncological ventral antigen 1 |
| 509 | Nox1 | NADPH oxidase 1 |
| 510 | Nox4 | NADPH oxidase 4 |
| 511 | Npb | neuropeptide B |
| 512 | Npepps | aminopeptidase puromycin sensitive |
| 513 | Nppc | natriuretic peptide precursor type C |
| 514 | Nptx1 | neuronal pentraxin 1 |
| 515 | Npy | neuropeptide Y |
| 516 | Npy1r | neuropeptide Y receptor Y1 |
| 517 | Npy2r | neuropeptide Y receptor Y2 |
| 518 | Npy5r | neuropeptide Y receptor Y5 |
| 519 | Nqo1 | NAD(P)H dehydrogenase, quinone 1 |
| 520 | Nr1h2 | nuclear receptor subfamily 1, group H, member 2 |
| 521 | Nr2c2 | nuclear receptor subfamily 2, group C, member 2 |
| 522 | Nr2f6 | nuclear receptor subfamily 2, group F, member 6 |
| 523 | Nr3c1 | nuclear receptor subfamily 3, group C, member 1 |
| 524 | Nr4a1 | nuclear receptor subfamily 4, group A, member 1 |
| 525 | Nrg1 | neuregulin 1 |
| 526 | Nrm | nurim |
| 527 | Nt5e | 5' nucleotidase, ecto |
| 528 | Ntf3 | neurotrophin 3 |
| 529 | Ntf5 | neurotrophin 5 |
| 530 | Ntrk1 | neurotrophic tyrosine kinase, receptor, type 1 |
| 531 | Ntrk2 | neurotrophic tyrosine kinase, receptor, type 2 |
| 532 | Ntrk3 | neurotrophic tyrosine kinase, receptor, type 3 |
| 533 | Nts | neurotensin |
| 534 | Ntsr1 | neurotensin receptor 1 |
| 535 | Ntsr2 | neurotensin receptor 2 |
| 536 | Oprd1 | opioid receptor, delta 1 |
| 537 | Oprk1 | opioid receptor, kappa 1 |
| 538 | Oprl1 | opioid receptor-like 1 |
| 539 | Oprm1 | opioid receptor, mu 1 |
| 540 | Oprs1 | sigma non-opioid intracellular receptor 1 |
| 541 | Osm | oncostatin M |
| 542 | Oxt | oxytocin |
| 543 | Oxtr | oxytocin receptor |
| 544 | P2rx2 | purinergic receptor P2X, ligand-gated Ion channel, 2 |
| 545 | P2rx3 | purinergic receptor P2X, ligand-gated Ion channel, 3 |
| 546 | P2rx4 | purinergic receptor P2X, ligand-gated Ion channel, 4 |
| 547 | P2rx5 | purinergic receptor P2X, ligand-gated ion channel, 5 |
| 548 | P2rx7 | purinergic receptor P2X, ligand-gated Ion channel, 7 |
| 549 | P2ry1 | purinergic receptor P2Y, G-protein coupled 1 |
| 550 | P2ry12 | purinergic receptor P2Y, G-protein coupled 12 |
| 551 | P2ry13 | purinergic receptor P2Y, G-protein coupled, 13 |
| 552 | P2ry2 | purinergic receptor P2Y, G-protein coupled 2 |
| 553 | P2ry4 | pyrimidinergic receptor P2Y, G-protein coupled, 4 |
| 554 | P2ry6 | pyrimidinergic receptor P2Y, G-protein coupled, 6 |
| 555 | Pacsin1 | protein kinase C and casein kinase substrate in neurons 1 |
| 556 | Pak7 | p21 protein (Cdc42/Rac)-activated kinase 7 |
| 557 | Pawr | PRKC, apoptosis, WT1, regulator |
| 558 | Pbx2 | pre-B-cell leukemia homeobox 2 |
| 559 | Pcsk2 | proprotein convertase subtilisin/kexin type 2 |
| 560 | Pcsk6 | proprotein convertase subtilisin/kexin type 6 |
| 561 | Pdgfb | platelet-derived growth factor beta polypeptide |
| 562 | Pdyn | prodynorphin |
| 563 | Penk | preproenkephalin |
| 564 | Per1 | period homolog 1 |
| 565 | Per2 | period homolog 2 |
| 566 | Pick1 | protein interacting with C kinase 1 |
| 567 | Pik3ca | phosphatidylinositol-4,5-bisphosphate 3-kinase catalytic subunit alpha |
| 568 | Pik3cb | phosphatidylinositol-4,5-bisphosphate 3-kinase, catalytic subunit beta |
| 569 | Pik3cg | phosphoinositide-3-kinase, catalytic, gamma polypeptide |
| 570 | Pip5k1a | phosphatidylinositol-4-phosphate 5-kinase, type 1 alpha |
| 571 | Pip5k1b | phosphatidylinositol-4-phosphate 5-kinase, type I, beta |
| 572 | Pip5k1c | phosphatidylinositol-4-phosphate 5-kinase, type 1 gamma |
| 573 | Pirt | phosphoinositide-interacting regulator of transient receptor potential channels |
| 574 | Pitx3 | paired-like homeodomain 3 |
| 575 | Pkd2l1 | polycystic kidney disease 2-like 1 |
| 576 | Pla2g4a | phospholipase A2, group IVA |
| 577 | Pla2g4b | phospholipase A2, group IVB |
| 578 | Plaur | plasminogen activator, urokinase receptor |
| 579 | Plcb1 | phospholipase C, beta 1 |
| 580 | Plcb3 | phospholipase C, beta 3 |
| 581 | Plcb4 | phospholipase C, beta 4 |
| 582 | Plcg1 | phospholipase C, gamma 1 |
| 583 | Plcl1 | phospholipase C-like 1 |
| 584 | Pldn | pallidin |
| 585 | Plp1 | proteolipid protein (myelin) 1 |
| 586 | Pmp22 | peripheral myelin protein 22 |
| 587 | Pnmt | phenylethanolamine N-methyltransferase |
| 588 | Pnoc | prepronociceptin |
| 589 | Pomc | pro-opiomelanocortin-alpha |
| 590 | Por | P450 (cytochrone) oxidoreductase |
| 591 | Pou5f1 | POU class 5 homeobox 1 |
| 592 | Ppara | peroxisome proliferator activated receptor alpha |
| 593 | Pparg | peroxisome proliferator-activated receptor gamma |
| 594 | Ppp1r1b | protein phosphatase 1, regulatory (inhibitor) subunit 1B |
| 595 | Ppp1r9b | protein phosphatase 1, regulatory subunit 9B |
| 596 | Ppp3ca | protein phosphatase 3, catalytic subunit, alpha isozyme |
| 597 | Ppp3cc | protein phosphatase 3, catalytic subunit, gamma isozyme |
| 598 | Ppp3r1 | protein phosphatase 3, regulatory subunit B, alpha |
| 599 | Ppp3r2 | protein phosphatase 3, regulatory subunit B, beta |
| 600 | Ppt2 | palmitoyl-protein thioesterase 2 |
| 601 | Prkaa2 | protein kinase, AMP-activated, alpha 2 catalytic subunit |
| 602 | Prkaca | protein kinase, cAMP-dependent, catalytic, alpha |
| 603 | Prkacb | protein kinase, cAMP-dependent, catalytic, beta |
| 604 | Prkag2 | protein kinase, AMP-activated, gamma 2 non-catalytic subunit |
| 605 | Prkar1b | protein kinase, cAMP dependent regulatory, type I beta |
| 606 | Prkca | protein kinase C, alpha |
| 607 | Prkcb | protein kinase C, beta |
| 608 | Prkcc | protein kinase C, gamma |
| 609 | Prkcd | protein kinase C, delta |
| 610 | Prkce | protein kinase C, epsilon |
| 611 | Prkcg | protein kinase C, gamma |
| 612 | Prkd1 | protein kinase D1 |
| 613 | Prkd3 | protein kinase D3 |
| 614 | Prkg1 | protein kinase, cGMP-dependent, type 1 |
| 615 | Prl | prolactin |
| 616 | Prlhr | prolactin releasing hormone receptor |
| 617 | Prlr | prolactin receptor |
| 618 | Prnp | prion protein |
| 619 | Prok2 | prokineticin 2 |
| 620 | Prokr1 | prokineticin receptor 1 |
| 621 | Prrt1 | proline-rich transmembrane protein 1 |
| 622 | Prrxl1 | paired related homeobox protein-like 1 |
| 623 | Prx | periaxin |
| 624 | Psmb8 | proteasome (prosome, macropain) subunit, beta type, 8 |
| 625 | Psmb9 | proteasome (prosome, macropain) subunit, beta type, 9 |
| 626 | Psors1c1 | psoriasis susceptibility 1 candidate 1 |
| 627 | Ptafr | platelet-activating factor receptor |
| 628 | Ptgdr | prostaglandin D receptor |
| 629 | Ptgds | prostaglandin D2 synthase (brain) |
| 630 | Ptger1 | prostaglandin E receptor 1 (subtype EP1) |
| 631 | Ptger2 | prostaglandin E receptor 2 (subtype EP2) |
| 632 | Ptger3 | prostaglandin E receptor 3 (subtype EP3) |
| 633 | Ptger4 | prostaglandin E receptor 4 (subtype EP4) |
| 634 | Ptges | prostaglandin E synthase |
| 635 | Ptgfr | prostaglandin F receptor |
| 636 | Ptgir | prostaglandin I receptor |
| 637 | Ptgs1 | prostaglandin-endoperoxide synthase 1 |
| 638 | Ptgs2 | prostaglandin-endoperoxide synthase 2 |
| 639 | Pth2 | parathyroid hormone 2 |
| 640 | Pth2r | parathyroid hormone 2 receptor |
| 641 | Ptn | pleiotrophin |
| 642 | Ptpn6 | protein tyrosine phosphatase, non-receptor type 6 |
| 643 | Ptprz1 | protein tyrosine phosphatase, receptor type Z, polypeptide 1 |
| 644 | Pyy | peptide YY [Source:HGNC Symbol;Acc:9748] |
| 645 | Rab5a | RAB5A, member RAS oncogene family |
| 646 | Rabggta | Rab geranylgeranyl transferase, a subunit |
| 647 | Rad52 | RAD52 homolog (S. cerevisiae) |
| 648 | Rag1 | recombination activating gene 1 |
| 649 | Rag2 | recombination activating gene 2 |
| 650 | Ramp1 | receptor (calcitonin) activating modyfing protein 1 |
| 651 | Rap1a | RAP1A, member of RAS oncogene family |
| 652 | Rasd2 | RASD family, member 2 |
| 653 | Rbmxl2 | RNA binding motif protein, X-linked-like 2 |
| 654 | Rela | v-rel reticuloendotheliosis viral oncogene homolog A (avian) |
| 655 | Reln | reelin |
| 656 | Ret | ret proto-oncogene |
| 657 | Rgs2 | regulator of G-protein signaling 2 |
| 658 | Rgs4 | regulator of G-protein signaling 4 |
| 659 | Rgs9 | regulator of G-protein signaling 9 |
| 660 | Ring1 | ring finger protein 1 |
| 661 | Rnf5 | ring finger protein 5, E3 ubiquitin protein ligase |
| 662 | Rps18 | ribosomal protein S18 |
| 663 | Rps6ka3 | ribosomal protein S6 kinase polypeptide 3 |
| 664 | Rsk2 | ribosomal protein S6 kinase polypeptide 3 |
| 665 | Rtn4 | reticulon 4; axon growth inhibition [55] |
| 666 | Runx1 | runt-related transcription factor 1 |
| 667 | Runx2 | runt-related transcription factor 2 |
| 668 | Runx3 | runt-related transcription factor 3 |
| 669 | Rxrb | retinoid X receptor, beta |
| 670 | S100a10 | S100 calcium binding protein A10 |
| 671 | S100a12 | S100 calcium binding protein A12 |
| 672 | S100b | S100 protein, beta polypeptide |
| 673 | S1pr3 | sphingosine-1-phosphate receptor 3 |
| 674 | Sc5dl | sterol-C5-desaturase (ERG3 delta-5-desaturase homolog, S. cerevisiae)-like |
| 675 | Scd | stearoyl-CoA desaturase (delta-9-desaturase) |
| 676 | Scg3 | secretogranin III |
| 677 | Scn10a | sodium channel, voltage-gated, type X, alpha |
| 678 | Scn11a | sodium channel, voltage-gated, type XI, alpha |
| 679 | Scn1a | sodium channel, voltage-gated, type I, alpha subunit |
| 680 | Scn2a | sodium channel, voltage-gated, type II, alpha subunit |
| 681 | Scn2b | sodium channel, voltage-gated, type II, beta |
| 682 | Scn3a | sodium channel, voltage-gated, type III, alpha subunit |
| 683 | Scn5a | sodium channel, voltage-gated, type V, alpha subunit |
| 684 | Scn8a | sodium channel, voltage gated, type VIII, alpha subunit |
| 685 | Scn9a | sodium channel, voltage-gated, type IX, alpha |
| 686 | Sema6a | semaphoring 6A |
| 687 | Serpina3n | serine (or cysteine) peptidase inhibitor, clade A, member 3N |
| 688 | Serpinb1a | "serine (or cysteine) peptidase inhibitor, clade B, member 1a |
| 689 | Sesn2 | sestrin 2 |
| 690 | Set | SET nuclear oncogene |
| 691 | Sfta2 | surfactant associated 2 |
| 692 | Sgk1 | serum/glucocorticoid regulated kinase 1 |
| 693 | Shc1 | src homology 2 domain-containing transforming protein C1 |
| 694 | Shisa9 | shisa family member 9, AMPAR-associated |
| 695 | Sigmar1 | sigma non-opioid intracellular receptor 1 |
| 696 | Slc12a2 | solute carrier family 12, member 2 |
| 697 | Slc12a5 | solute carrier family 12, member 5 |
| 698 | Slc12a6 | solute carrier family 12, member 6 |
| 699 | Slc15a2 | solute carrier family 15 (H+/peptide transporter), member 2 |
| 700 | Slc17a6 | solute carrier family 17 (sodium-dependent inorganic phosphate cotransporter), member 6 |
| 701 | Slc17a7 | solute carrier family 17 (sodium-dependent inorganic phosphate cotransporter), member 7 |
| 702 | Slc17a8 | solute carrier family 17 (sodium-dependent inorganic phosphate cotransporter), member 8 |
| 703 | Slc18a2 | solute carrier family 18 (vesicular monoamine), member 2 |
| 704 | Slc1a3 | solute carrier family 1 (glial high affinity glutamate transporter), member 3 |
| 705 | Slc29a1 | solute carrier family 29 (nucleoside transporters), member 1 |
| 706 | Slc32a1 | solute carrier family 32 (GABA vesicular transporter), member 1 |
| 707 | Slc39a7 | solute carrier family 39 (zinc transporter), member 7 |
| 708 | Slc44a4 | solute carrier family 44, member 4 |
| 709 | Slc6a1 | solute carrier family 6 (neurotransmitter transporter, GABA), member 1 |
| 710 | Slc6a11 | solute carrier family 6 (neurotransmitter transporter, GABA), member 11 |
| 711 | Slc6a13 | solute carrier family 6 (neurotransmitter transporter, GABA), member 13 |
| 712 | Slc6a2 | solute carrier family 6 (neurotransmitter transporter, noradrenalin), member 2 |
| 713 | Slc6a3 | solute carrier family 6 (neurotransmitter transporter, dopamine), member 3 |
| 714 | Slc6a4 | solute carrier family 6 (neurotransmitter transporter, serotonin), member 4 |
| 715 | Slc6a6 | solute carrier family 6 (neurotransmitter transporter, serotonin), member 6 |
| 716 | Sod2 | superoxide dismutase 2, mitochondrial |
| 717 | Sox11 | SRY (sex determining region Y)-box 11 |
| 718 | Sparc | secreted acidic cysteine rich glycoproteni |
| 719 | Sphk2 | sphingosine kinase 2 |
| 720 | Spp1 | secreted phosphoprotein 1 |
| 721 | Sprr1a | small proline-rich protein 1A |
| 722 | Sptlc1 | serine palmitoyltransferase, long chain base subunit 1 |
| 723 | Srd5a1 | steroid 5 alpha-reductase 1 |
| 724 | Srr | serine racemase |
| 725 | Sstr4 | somatostatin receptor 4 |
| 726 | St8sia1 | ST8 alpha-N-acetyl-neuraminide alpha-2,8-sialyltransferase 1 |
| 727 | Stard13 | StAR-related lipid transfer (START) domain containing 13 |
| 728 | Stau1 | staufen, RNA binding protein, homolog 1 (Drosophila) |
| 729 | Stau2 | staufen, RNA binding protein, homolog 2 (Drosophila) |
| 730 | Stk39 | serine/threonine kinase 39, STE20/SPS1 homolog (yeast) |
| 731 | Stmn4 | stathmin-like 4; promote microtubule assemble (Iwata 02) |
| 732 | Stoml3 | stomatin (Epb7.2)-like 3 |
| 733 | Stx1a | syntaxin 1A (brain) |
| 734 | SYMBOL | description |
| 735 | Syn2 | synapsin II |
| 736 | Synpr | Synaptoporin |
| 737 | Taar1 | trace amine associated receptor 1 |
| 738 | Taar2 | trace amine associated receptor 2 |
| 739 | Taar5 | trace amine associated receptor 5 |
| 740 | Taar6 | trace amine associated receptor 6 |
| 741 | Taar8 | trace amine associated receptor 8 |
| 742 | Taar9 | trace amine associated receptor 9 (gene/pseudogene) |
| 743 | Tac1 | tachykinin 1 |
| 744 | Tac4 | tachykinin 4 |
| 745 | Tacr1 | tachykinin receptor 1 |
| 746 | Tacr2 | tachykinin receptor 2 |
| 747 | Tacr3 | tachykinin receptor 3 |
| 748 | Tap1 | transporter 1, ATP-binding cassette, sub-family B (MDR/TAP) |
| 749 | Tap2 | transporter 2, ATP-binding cassette, sub-family B (MDR/TAP) |
| 750 | Tcf19 | transcription factor 19 |
| 751 | Tcirg1 | T-cell, immune regulator 1, ATPase, H+ transporting, lysosomal V0 subunit A3 |
| 752 | Tgfb1 | transforming growth factor, beta 1 |
| 753 | Th | tyrosine hydroxylase |
| 754 | Thbs4 | thrombospondin 4 |
| 755 | Tlr2 | toll-like receptor 2 |
| 756 | Tlr3 | toll-like receptor 3 |
| 757 | Tlr4 | toll-like receptor 4 |
| 758 | Tlr5 | toll-like receptor 5 |
| 759 | Tlr9 | toll-like receptor 9 |
| 760 | Tmem88b | transmembrane protein 88B |
| 761 | Tmsb10 | thymosin beta 10 |
| 762 | Tmsb4x | thymosin beta 4, X-linked |
| 763 | Tnf | tumor necrosis factor |
| 764 | Tnfaip3 | tumor necrosis factor, alpha-induced protein 3 |
| 765 | Tnfrsf1a | tumor necrosis factor receptor superfamily, member 1a |
| 766 | Tnfrsf1b | tumor necrosis factor receptor superfamily, member 1b |
| 767 | Tnxb | tenascin XB |
| 768 | Tph2 | tryptophan hydroxylase 2 |
| 769 | Trim10 | tripartite motif containing 10 |
| 770 | Trim15 | tripartite motif containing 15 |
| 771 | Trim26 | tripartite motif containing 26 |
| 772 | Trim31 | tripartite motif containing 31 |
| 773 | Trim40 | tripartite motif containing 40 |
| 774 | Trpa1 | transient receptor potential cation channel, subfamily A, member 1 |
| 775 | Trpc3 | transient receptor potential cation channel, subfamily C, member 3 |
| 776 | Trpm2 | transient receptor potential cation channel, subfamily M, member 2 |
| 777 | Trpm3 | transient receptor potential cation channel, subfamily M, member 3 |
| 778 | Trpm8 | transient receptor potential cation channel, subfamily M, member 8 |
| 779 | Trpv1 | transient receptor potential cation channel, subfamily V, member 1 |
| 780 | Trpv2 | transient receptor potential cation channel, subfamily V, member 2 |
| 781 | Trpv3 | transient receptor potential cation channel, subfamily V, member 3 |
| 782 | Trpv4 | transient receptor potential catIon channel, subfamily V, member 4 |
| 783 | Tuba4a | tubulin, alpha 4A |
| 784 | Tubb | tubulin, beta class I |
| 785 | Tubb6 | tubulin, beta 6 class V |
| 786 | Tyrp1 | tyrosinase-related protein 1 |
| 787 | Uchl1 | ubiquitin carboxy-terminal hydrolase L1 |
| 788 | Ucp2 | uncoupling protein 2 (mitochondrial, proton carrier) |
| 789 | Ugt2b7 | UDP glucuronosyltransferase 2 family, polypeptide B7 |
| 790 | Vars2 | valyl-tRNA synthetase 2, mitochondrial |
| 791 | Vdr | vitamin D (1,25- dihydroxyvitamin D3) receptor |
| 792 | Vegfa | vascular endothelial growth factor A |
| 793 | Vip | vasoactive intestinal polypeptide |
| 794 | Vps4a | vacuolar protein sorting 4 homolog A |
| 795 | Vps4b | vacuolar protein sorting 4 homolog B |
| 796 | Vps52 | vacuolar protein sorting 52 homolog |
| 797 | Wld | wallerian degeneration |
| 798 | Wnk1 | WNK lysine deficient protein kinase 1 |
| 799 | Xdh | xanthine dehydrogenase [Source:HGNC Symbol;Acc:12805] |
| 800 | Ywhaz | tyrosine 3-monooxygenase/tryptophan 5-monooxygenase activation protein, zeta polypeptide |
| 801 | Yy1 | YY1 transcription factor |
| 802 | Zeb2 | zinc finger E-box binding homeobox 2 |
| 803 | Zfand5 | zinc finger, AN1-type domain 5 |
| 804 | Zfand6 | zinc finger, AN1-type domain 6 |

**Supplementary Table 2 Primers designed for RT-qPCR validation of candidate ncRNAs and mRNA**

| **RNA** | **Forward sequence** | **Reverse sequence** |
| --- | --- | --- |
| A630023A22Rik-202 | AGAAACAAGCTCCTACATACACCA | TCCTGTCAAAGATCAGGCGG |
| mmu_circ_0000668 | TGCGCTTCAGACATGAGAACA | TGCTGTGGAAGGTTGTATATGCT |
| Anxa10 | TGATGGATGCCCAAATGCTA | CCGGCCATACATGCTCTGAT |
| mmu-miR-134-3p | TTTCGGGCCACCTAGTCAAAA | mRQ 3' Primer (Cat. No 638313, Takara,China) |
| Gapdh | AACAGCAACTCCCACTCTTC | CCTCTCTTGCTCAGTGTCCT |
| U6 | GGAACGATACAGAGAAGATTAGC | TGGAACGCTTCACGAATTTGCG |

**Supplementary Table 3 The detailed information of the DE miRNAs in the TG of CCI-ION mice**

| **No.** | **miRNA_name** | **D7CCI_TPM** | **S_TPM** | │log2FC│ ≥0.485 | ***P* value** | **up-down** |
| --- | --- | --- | --- | --- | --- | --- |
| 1 | mmu-miR-450a-1-3p | 0.800183606 | 0 | 4.347796593 | 0.041081793 | up |
| 2 | mmu-miR-5107-5p | 0.68066048 | 0 | 4.135279575 | 0.038019388 | up |
| 3 | mmu-miR-344e-3p | 4.731615911 | 0.322391636 | 3.745759357 | 2.51E-05 | up |
| 4 | mmu-miR-34b-5p | 0.937639021 | 0.068247218 | 3.660105257 | 0.038619776 | up |
| 5 | mmu-miR-429-3p | 13.80748154 | 2.66394412 | 2.168556864 | 2.54E-05 | up |
| 6 | mmu-miR-206-3p | 64.69658654 | 14.47226879 | 1.956318391 | 0.000273369 | up |
| 7 | mmu-miR-199a-5p | 1266.351773 | 338.6479833 | 1.708829309 | 4.60E-06 | up |
| 8 | mmu-miR-212-3p | 6.723332099 | 2.068431847 | 1.479277934 | 0.046044841 | up |
| 9 | mmu-miR-199b-5p | 278.8407933 | 91.16735325 | 1.417757287 | 1.03E-05 | up |
| 10 | mmu-miR-1188-5p | 10.85664931 | 3.62844309 | 1.36950594 | 0.01142168 | up |
| 11 | mmu-miR-200a-3p | 129.5534972 | 45.75889555 | 1.286126227 | 0.011329085 | up |
| 12 | mmu-miR-144-5p | 26.17245642 | 9.32151906 | 1.265026614 | 0.000906943 | up |
| 13 | mmu-miR-18a-5p | 6.446442314 | 2.308318232 | 1.253535559 | 0.024855743 | up |
| 14 | mmu-miR-449a-5p | 7.76297494 | 2.831257255 | 1.218578154 | 0.046553133 | up |
| 15 | mmu-miR-144-3p | 21.537593 | 7.869614804 | 1.213593483 | 0.010688482 | up |
| 16 | mmu-miR-34c-5p | 330.2750428 | 126.6712225 | 1.184640836 | 0.011897146 | up |
| 17 | mmu-miR-200c-3p | 37.47112298 | 14.61928827 | 1.119177562 | 0.037098584 | up |
| 18 | mmu-miR-487b-3p | 37.93799471 | 16.11412645 | 1.037994938 | 0.006539149 | up |
| 19 | mmu-miR-200b-3p | 110.649531 | 47.71634044 | 1.011628456 | 0.014158053 | up |
| 20 | mmu-miR-6540-5p | 84.34788869 | 36.89217447 | 1.008051431 | 0.013559416 | up |
| 21 | mmu-miR-212-5p | 58.28954625 | 25.77339622 | 0.973905144 | 0.019534592 | up |
| 22 | mmu-miR-221-3p | 147.4164212 | 66.69454088 | 0.93521086 | 0.017745934 | up |
| 23 | mmu-miR-323-3p | 311.7818433 | 143.3456151 | 0.926130059 | 0.003946326 | up |
| 24 | mmu-miR-222-3p | 200.8338932 | 91.60912956 | 0.92556073 | 0.011642745 | up |
| 25 | mmu-miR-344-3p | 160.6536178 | 76.23891536 | 0.853755271 | 0.034864635 | up |
| 26 | mmu-miR-668-3p | 39.42293733 | 19.28672328 | 0.836826529 | 0.024696573 | up |
| 27 | mmu-miR-21a-5p | 41799.13941 | 20361.68919 | 0.829235602 | 0.00744882 | up |
| 28 | mmu-miR-344d-3p | 46.27674186 | 22.88487788 | 0.821193548 | 0.014296868 | up |
| 29 | mmu-miR-214-5p | 45.25533129 | 22.32136076 | 0.818171545 | 0.034620677 | up |
| 30 | mmu-miR-142a-5p | 306.3983289 | 151.9589446 | 0.809049511 | 0.016083637 | up |
| 31 | mmu-miR-143-5p | 33.60605234 | 16.88753955 | 0.78637096 | 0.025288341 | up |
| 32 | mmu-miR-298-5p | 32.48280226 | 16.64125974 | 0.768004946 | 0.03405026 | up |
| 33 | mmu-miR-199a-3p | 2369.833321 | 1228.73918 | 0.757330781 | 0.039956539 | up |
| 34 | mmu-miR-431-3p | 58.39280078 | 32.16223628 | 0.659178465 | 0.036731906 | up |
| 35 | mmu-miR-181c-3p | 46.45187966 | 26.14865401 | 0.634978128 | 0.04370202 | up |
| 36 | mmu-miR-409-5p | 249.7534368 | 142.0552236 | 0.617551027 | 0.049738903 | up |
| 37 | mmu-miR-341-3p | 1006.932114 | 597.1365971 | 0.548111062 | 0.043619428 | up |
| 38 | mmu-miR-151-3p | 2525.526942 | 3262.056674 | -0.572667381 | 0.032943404 | down |
| 39 | mmu-miR-383-5p | 373.0456956 | 485.1425731 | -0.577758503 | 0.038136867 | down |
| 40 | mmu-miR-138-1-3p | 61.47189387 | 81.20151845 | -0.602549481 | 0.038205049 | down |
| 41 | mmu-miR-129-5p | 2500.164834 | 3363.172496 | -0.631426063 | 0.013927003 | down |
| 42 | mmu-miR-129b-3p | 2485.966233 | 3345.624654 | -0.632110025 | 0.013792067 | down |
| 43 | mmu-miR-183-5p | 40861.11101 | 55282.67521 | -0.635319764 | 0.014233619 | down |
| 44 | mmu-miR-1224-5p | 33.9907497 | 46.45238169 | -0.651510875 | 0.043424283 | down |
| 45 | mmu-miR-146a-5p | 511.0829869 | 703.8583886 | -0.670579771 | 0.026026236 | down |
| 46 | mmu-miR-182-5p | 38110.12532 | 53077.26921 | -0.6876344 | 0.046169673 | down |
| 47 | mmu-miR-34a-5p | 498.4974123 | 696.7163742 | -0.695488591 | 0.042937157 | down |
| 48 | mmu-miR-574-3p | 324.910538 | 467.1421472 | -0.734575044 | 0.029730476 | down |
| 49 | mmu-miR-330-5p | 649.7310761 | 934.4124065 | -0.735156717 | 0.017815077 | down |
| 50 | mmu-miR-7043-3p | 9.716279783 | 14.35831115 | -0.765859986 | 0.040283002 | down |
| 51 | mmu-miR-134-3p | 15.69977009 | 23.22959306 | -0.767533996 | 0.023579453 | down |
| 52 | mmu-miR-3102-3p | 27.71506975 | 42.81891017 | -0.846749925 | 0.041976794 | down |
| 53 | mmu-miR-1839-3p | 13.47565384 | 21.50064372 | -0.882887552 | 0.03180306 | down |
| 54 | mmu-miR-3535 | 38.37256289 | 64.87901166 | -0.974162091 | 0.013168268 | down |
| 55 | mmu-miR-3470b | 19.09936749 | 32.80076104 | -0.981080776 | 0.00554511 | down |
| 56 | mmu-miR-376b-5p | 65.1105556 | 119.5303301 | -1.09838223 | 0.010767923 | down |
| 57 | mmu-miR-5099 | 8.296503307 | 15.986419 | -1.139429815 | 0.008668934 | down |
| 58 | mmu-miR-29c-5p | 49.38505739 | 95.0576556 | -1.166125308 | 0.007381226 | down |
| 59 | mmu-miR-216a-3p | 81.40469136 | 159.2718059 | -1.167225391 | 0.00132284 | down |
| 60 | mmu-miR-129-1-3p | 43.72011029 | 94.24520454 | -1.328492334 | 0.000659545 | down |
| 61 | mmu-miR-5620-5p | 0.440075588 | 1.620240087 | -2.109921516 | 0.037662053 | down |
| 62 | mmu-miR-3473f | 0.258171795 | 1.595159122 | -2.940018297 | 0.032825682 | down |
| 63 | mmu-miR-5128 | 0.137395514 | 0.968065839 | -3.192026256 | 0.044611629 | down |
| 64 | mmu-miR-1195 | 0.114173705 | 0.990474013 | -3.349212449 | 0.034836233 | down |
| 65 | novel_281 | 0.104157048 | 0.973543188 | -3.369069167 | 0.033411736 | down |
| 66 | mmu-miR-6954-3p | 0.045475948 | 0.763324186 | -3.881801541 | 0.033565296 | down |
| 67 | mmu-miR-1941-5p | 0 | 0.486771594 | -4.21199445 | 0.048012759 | down |

**Supplementary Table 4 The detailed information of the DE lncRNAs in the TG of CCI-ION mice**

| **No.** | **lncRNA_name** | **D7CCI_FPKM** | **S_FPKM** | │log2FC│≥1 | **Adjusted *P* value** | **up-down** |
| --- | --- | --- | --- | --- | --- | --- |
| 1 | Ank2-216 | 36.44222033 | 0.681348333 | 5.647535058 | 0.015339592 | up |
| 2 | Aplp1-204 | 12.86773233 | 0 | 16.03360876 | 0.004843568 | up |
| 3 | Ptprs-221 | 11.149784 | 0 | 15.34976172 | 0.045348902 | up |
| 4 | Rrp1-203 | 10.053827 | 0 | 15.24911549 | 0.002300599 | up |
| 5 | Mfap4-203 | 8.073318667 | 0 | 13.63160058 | 0.010653943 | up |
| 6 | Fmc1-202 | 3.730686333 | 0 | 13.33265816 | 0.013501957 | up |
| 7 | Fam120b-202 | 2.855686 | 0 | 15.59954485 | 0.001393928 | up |
| 8 | Anxa11-204 | 1.708767667 | 0 | 15.16839963 | 0.002382505 | up |
| 9 | Plppr3-202 | 1.362848 | 0 | 12.63676283 | 0.023573374 | up |
| 10 | Zbtb20-213 | 0.959033333 | 0 | 14.61626206 | 9.26E-11 | up |
| 11 | Dleu2-212 | 0.901971667 | 0 | 13.27196638 | 0.014330319 | up |
| 12 | Rars2-204 | 0.739330667 | 0 | 13.97235117 | 0.007797849 | up |
| 13 | Fez2-207 | 0.701367667 | 0 | 12.96057866 | 0.017689198 | up |
| 14 | Tchp-202 | 0.636148667 | 0 | 11.13558539 | 0.049019051 | up |
| 15 | Anxa1-203 | 0.577542667 | 0 | 11.52561075 | 0.04241255 | up |
| 16 | Scyl2-202 | 0.536555333 | 0 | 11.89499827 | 0.03398808 | up |
| 17 | Tmem87a-204 | 0.522779667 | 0 | 13.55077872 | 0.010915052 | up |
| 18 | Pex11b-204 | 0.474047333 | 0 | 11.1539699 | 0.047772502 | up |
| 19 | A630023A22Rik-202 | 0.469433667 | 0 | 13.49594258 | 3.26E-05 | up |
| 20 | Ccnb1-204 | 0.452938333 | 0 | 9.008964138 | 0.041248803 | up |
| 21 | Mx1-205 | 0.414917333 | 0 | 11.60808027 | 0.001173464 | up |
| 22 | Psmc6-202 | 0.406250333 | 3.33E-07 | 8.588980666 | 0.010182735 | up |
| 23 | Ccnb1-206 | 0.403664667 | 0 | 9.00850421 | 0.047987403 | up |
| 24 | TCONS_00032016 | 0.400007333 | 0 | 11.65999642 | 0.003706464 | up |
| 25 | TCONS_00124330 | 0.38105 | 0 | 13.37872252 | 0.013076981 | up |
| 26 | Gas7-210 | 0.370426333 | 0 | 13.61549543 | 0.013009497 | up |
| 27 | Mms22l-210 | 0.322328333 | 0 | 13.67317735 | 0.009882031 | up |
| 28 | TCONS_00269877 | 0.321668333 | 0 | 12.71580947 | 0.021017143 | up |
| 29 | Exosc7-206 | 0.312435 | 0 | 11.33414516 | 0.002606848 | up |
| 30 | Fam162a-204 | 0.311326 | 0 | 10.30747431 | 0.005770626 | up |
| 31 | Riok3-212 | 0.307309667 | 0 | 10.87215187 | 0.002924 | up |
| 32 | TCONS_00200175 | 0.305700667 | 0 | 11.67289884 | 0.001659368 | up |
| 33 | Ryr3-208 | 0.300430667 | 0.002702667 | 6.69369587 | 0.015970193 | up |
| 34 | Cdcp1-203 | 0.293820333 | 0 | 9.995038941 | 0.009791865 | up |
| 35 | 4933427D14Rik-207 | 0.286681667 | 0 | 11.43935551 | 0.043363409 | up |
| 36 | Trp53i11-203 | 0.270337333 | 0 | 10.65176078 | 0.037288555 | up |
| 37 | TCONS_00252476 | 0.266488667 | 0 | 12.39693683 | 0.027136718 | up |
| 38 | TCONS_00127351 | 0.263172667 | 0 | 11.2519611 | 0.003667449 | up |
| 39 | TCONS_00127833 | 0.261831667 | 0 | 10.86928524 | 0.004229455 | up |
| 40 | Nwd1-203 | 0.261455667 | 0 | 12.64127919 | 0.0223268 | up |
| 41 | Cenpu-209 | 0.25627 | 0 | 10.3996122 | 0.008669607 | up |
| 42 | TCONS_00066323 | 0.252679667 | 0 | 11.06092603 | 0.002454921 | up |
| 43 | TCONS_00224056 | 0.251784667 | 0 | 12.05830922 | 0.038281396 | up |
| 44 | TCONS_00284660 | 0.243831333 | 0 | 14.01426407 | 0.010018132 | up |
| 45 | TCONS_00146187 | 0.240194333 | 0 | 8.956760028 | 0.032434003 | up |
| 46 | TCONS_00228568 | 0.237338667 | 0 | 9.0079703 | 0.028325937 | up |
| 47 | Dda1-210 | 0.236470667 | 0 | 8.443002865 | 0.048784869 | up |
| 48 | TCONS_00123069 | 0.228545667 | 0 | 8.715110905 | 0.043136686 | up |
| 49 | Rars2-202 | 0.217238333 | 0 | 10.0914388 | 0.007591182 | up |
| 50 | Airn-206 | 0.217147 | 0 | 13.157865 | 0.015577432 | up |
| 51 | TCONS_00092230 | 0.208866333 | 0 | 9.725409153 | 0.019022833 | up |
| 52 | Slc44a1-207 | 0.205259333 | 0 | 13.06965275 | 8.49E-05 | up |
| 53 | E330011O21Rik-209 | 0.204835 | 0 | 12.00332233 | 0.038326682 | up |
| 54 | Cinp-212 | 0.203323333 | 0 | 9.982608002 | 0.008669607 | up |
| 55 | TCONS_00228236 | 0.202351333 | 0 | 9.193936507 | 0.029822047 | up |
| 56 | 3110039I08Rik-213 | 0.200084667 | 0 | 12.37041758 | 0.028325937 | up |
| 57 | Gm14453-201 | 0.198023667 | 0 | 9.693830278 | 0.021792431 | up |
| 58 | Dtl-204 | 0.195178 | 0 | 10.42817543 | 0.013057298 | up |
| 59 | Kif23-210 | 0.194104667 | 6.80E-05 | 8.40759579 | 0.018974257 | up |
| 60 | Mrpl33-209 | 0.193210667 | 0 | 11.32653621 | 0.004371938 | up |
| 61 | TCONS_00246824 | 0.188218 | 0 | 14.36010383 | 0.009030327 | up |
| 62 | TCONS_00029142 | 0.184381333 | 0 | 11.24022436 | 0.04672172 | up |
| 63 | Anxa10-203 | 0.182804333 | 0 | 12.34949818 | 0.000508675 | up |
| 64 | TCONS_00242572 | 0.181561333 | 0 | 8.877889696 | 0.040057621 | up |
| 65 | Mcoln2-203 | 0.178949 | 0 | 10.91760335 | 0.003707992 | up |
| 66 | Bzw2-207 | 0.176170667 | 0 | 11.59753674 | 0.039433647 | up |
| 67 | TCONS_00200174 | 0.171225333 | 0 | 11.04823442 | 0.006558443 | up |
| 68 | TCONS_00092020 | 0.171092333 | 0 | 13.05296 | 0.016675437 | up |
| 69 | TCONS_00036183 | 0.170610333 | 0 | 11.32236359 | 0.004022983 | up |
| 70 | Zfp384-209 | 0.169126333 | 0 | 10.23814812 | 0.00800861 | up |
| 71 | TCONS_00013345 | 0.166601333 | 0 | 12.61497713 | 0.027360063 | up |
| 72 | Pan3-223 | 0.160792667 | 0 | 10.77064034 | 0.003631712 | up |
| 73 | TCONS_00013099 | 0.160395667 | 0 | 11.43631656 | 0.044775275 | up |
| 74 | TCONS_00132444 | 0.159094667 | 0 | 11.56173546 | 0.041757619 | up |
| 75 | 9430038I01Rik-205 | 0.158601 | 0 | 11.38296218 | 0.043451914 | up |
| 76 | Stab2-207 | 0.157735667 | 0 | 9.804850925 | 0.011956781 | up |
| 77 | Gm42902-201 | 0.156880333 | 0 | 9.650665394 | 0.012873545 | up |
| 78 | B230216N24Rik-201 | 0.154337333 | 0 | 10.27759338 | 0.008875206 | up |
| 79 | Tnrc6a-209 | 0.154289667 | 0 | 11.44310231 | 0.04241255 | up |
| 80 | Fkbp5-215 | 0.153489 | 0 | 10.67361375 | 0.005197165 | up |
| 81 | TCONS_00077457 | 0.152684333 | 0 | 11.83130856 | 0.04897572 | up |
| 82 | 1810007D17Rik-201 | 0.150348333 | 0 | 10.69575092 | 0.004911398 | up |
| 83 | Ubl3-203 | 0.149769333 | 0 | 11.56614148 | 0.00143211 | up |
| 84 | TCONS_00016125 | 0.145375333 | 0 | 11.38897569 | 0.044775275 | up |
| 85 | Ccdc162-206 | 0.144819 | 0 | 9.676282913 | 0.030792413 | up |
| 86 | Rbfox3-207 | 0.140828333 | 0 | 12.34435745 | 0.000402788 | up |
| 87 | 4933424M12Rik-202 | 0.140378667 | 0 | 8.716117643 | 0.037755812 | up |
| 88 | 9530026P05Rik-203 | 0.140060667 | 0 | 13.47802807 | 0.012788708 | up |
| 89 | Pcdh15-230 | 0.138381333 | 0 | 14.63680686 | 0.004227334 | up |
| 90 | TCONS_00261438 | 0.134567333 | 0 | 11.11223512 | 0.006641929 | up |
| 91 | Fgr-202 | 0.134195 | 0 | 9.355199641 | 0.021711813 | up |
| 92 | B230216N24Rik-204 | 0.132604333 | 0 | 9.989479533 | 0.008456093 | up |
| 93 | Pacrg-202 | 0.129401 | 0 | 11.76688194 | 0.006162703 | up |
| 94 | TCONS_00129784 | 0.128504667 | 0 | 13.43882605 | 0.000210479 | up |
| 95 | Gm20663-201 | 0.124135667 | 0 | 13.47512731 | 0.011623896 | up |
| 96 | TCONS_00099844 | 0.114829333 | 0 | 11.32225433 | 0.048136353 | up |
| 97 | Sox5os3-201 | 0.113453667 | 0 | 10.15834362 | 0.007340076 | up |
| 98 | Pantr1-212 | 0.112810667 | 0 | 11.3176386 | 0.045123884 | up |
| 99 | Gm4632-201 | 0.106731 | 0 | 10.00488349 | 0.010385745 | up |
| 100 | Tiam1-208 | 0.104174667 | 0 | 10.20377026 | 0.012171122 | up |
| 101 | TCONS_00296036 | 0.103257667 | 0 | 13.85638984 | 0.011623896 | up |
| 102 | Galntl6-201 | 0.103224 | 0 | 14.56541064 | 4.92E-06 | up |
| 103 | March10-203 | 0.101710333 | 0 | 8.575546851 | 0.045348902 | up |
| 104 | Gm15774-201 | 0.099463 | 0 | 8.863077052 | 0.033225646 | up |
| 105 | Mrrf-203 | 0.097565333 | 0 | 9.179824873 | 0.049019051 | up |
| 106 | Letm2-207 | 0.096771667 | 0 | 9.653183813 | 0.014514322 | up |
| 107 | Cdh4-204 | 0.096696667 | 0 | 13.88858963 | 0.009072829 | up |
| 108 | Pde9a-204 | 0.093511667 | 0 | 9.594419791 | 0.021886462 | up |
| 109 | TCONS_00212640 | 0.091416667 | 0 | 10.36290969 | 0.006017201 | up |
| 110 | 3110039I08Rik-216 | 0.091085 | 0 | 11.81375888 | 0.011481879 | up |
| 111 | Gm8633-201 | 0.088823667 | 0 | 11.09294092 | 0.00267738 | up |
| 112 | Vac14-203 | 0.086671 | 0 | 11.8519361 | 0.047836386 | up |
| 113 | Col13a1-201 | 0.086249667 | 0 | 12.34786921 | 0.032231103 | up |
| 114 | Celf2-215 | 0.084340667 | 0 | 12.22346309 | 0.032077505 | up |
| 115 | 4933406I18Rik-201 | 0.081856333 | 0 | 11.20611251 | 0.046647043 | up |
| 116 | TCONS_00108753 | 0.075722667 | 0 | 9.289801823 | 0.020024087 | up |
| 117 | Prkcz-208 | 0.07529 | 0 | 10.92254237 | 0.004102144 | up |
| 118 | Hmmr-202 | 0.073797333 | 0 | 8.552230406 | 0.045348902 | up |
| 119 | Gm12708-202 | 0.069764667 | 0 | 9.081482886 | 0.030268794 | up |
| 120 | Crnde-206 | 0.069507333 | 0 | 9.950688055 | 0.010073498 | up |
| 121 | Kif15-209 | 0.066381 | 0 | 9.372386354 | 0.031928679 | up |
| 122 | 4930544M13Rik-201 | 0.066359667 | 0 | 10.63291495 | 0.004815876 | up |
| 123 | Gm31831-202 | 0.065717667 | 0 | 11.59953705 | 0.001473926 | up |
| 124 | Dscaml1-208 | 0.061429667 | 0 | 12.03389175 | 0.033225646 | up |
| 125 | Synpo2-205 | 0.058916333 | 0 | 10.76810205 | 0.004676079 | up |
| 126 | Kcnt2-204 | 0.058880667 | 0 | 11.12834049 | 0.002435329 | up |
| 127 | Gm15397-201 | 0.057587333 | 0 | 9.603413187 | 0.01381712 | up |
| 128 | Cdcp1-202 | 0.051754667 | 0 | 9.782881377 | 0.024003841 | up |
| 129 | AC141639.1-201 | 0.049957 | 0 | 8.665916756 | 0.047836386 | up |
| 130 | A930017M01Rik-204 | 0.048772 | 0 | 11.26773789 | 0.001990849 | up |
| 131 | Gm7644-201 | 0.047109333 | 0 | 8.666312769 | 0.040105975 | up |
| 132 | 1700017M07Rik-201 | 0.045890333 | 0 | 8.758977221 | 0.039410491 | up |
| 133 | Gm28905-201 | 0.042303 | 0 | 11.8172724 | 0.036993688 | up |
| 134 | Spta1-202 | 0.042017 | 0 | 9.304127369 | 0.034162175 | up |
| 135 | TCONS_00059628 | 0.039528667 | 0 | 11.2269723 | 0.045833055 | up |
| 136 | Glis3-207 | 0.039047333 | 0 | 12.38328409 | 0.03398808 | up |
| 137 | Elfn2-203 | 0.038754333 | 0 | 9.366575555 | 0.039905159 | up |
| 138 | Fbxl13-203 | 0.038201 | 0 | 11.42675569 | 0.048424973 | up |
| 139 | Gm49267-201 | 0.03535 | 0 | 9.213223386 | 0.025254431 | up |
| 140 | Nedd9-203 | 0.034447667 | 0 | 9.815716606 | 0.012476391 | up |
| 141 | Gm12649-201 | 0.03254 | 0 | 11.68817511 | 0.038229468 | up |
| 142 | Tmprss11f-202 | 0.029505333 | 0 | 9.910222942 | 0.013818632 | up |
| 143 | Cdh13-203 | 0.028211667 | 8.80E-05 | 7.936967428 | 0.00261322 | up |
| 144 | 4930554H23Rik-201 | 0.013307667 | 0 | 9.317559987 | 0.01900716 | up |
| 145 | Gm20649-201 | 0.001385667 | 1.841043667 | -10.2417374 | 0.015577432 | down |
| 146 | Synj2-207 | 0.000241 | 0.193260333 | -9.155936054 | 0.030889087 | down |
| 147 | Gm14266-202 | 0 | 0.047446667 | -8.743917174 | 0.038281396 | down |
| 148 | B230303O12Rik-201 | 0 | 0.147656667 | -8.817014361 | 0.039443563 | down |
| 149 | Suco-207 | 0 | 0.108603333 | -9.020015112 | 0.027472547 | down |
| 150 | Odf2l-217 | 0 | 0.167477 | -9.081649923 | 0.029922018 | down |
| 151 | Gm30504-202 | 0 | 0.072421667 | -9.106397069 | 0.027874238 | down |
| 152 | 5430402P08Rik-201 | 0 | 0.048770667 | -9.466994526 | 0.017271648 | down |
| 153 | TCONS_00261646 | 0 | 0.212622 | -9.724956023 | 0.016025422 | down |
| 154 | Senp1-208 | 0 | 0.469791 | -9.750247507 | 0.012553355 | down |
| 155 | Gm34016-201 | 0 | 0.096824333 | -9.82500889 | 0.013818632 | down |
| 156 | Elk4-203 | 0 | 0.331434 | -9.994020293 | 0.021711813 | down |
| 157 | 2010320O07Rik-201 | 0 | 0.113512333 | -10.10576133 | 0.017124946 | down |
| 158 | TCONS_00146505 | 0 | 0.444886333 | -10.17640971 | 0.010324744 | down |
| 159 | Mro-204 | 0 | 0.110724667 | -10.22740742 | 0.00670493 | down |
| 160 | TCONS_00094805 | 0 | 0.288881667 | -10.29872969 | 0.005864568 | down |
| 161 | TCONS_00123243 | 0 | 0.184034667 | -10.31203985 | 0.011761762 | down |
| 162 | Gm49860-201 | 0 | 0.052089667 | -10.36419381 | 0.00692488 | down |
| 163 | TCONS_00060374 | 0 | 0.183710333 | -10.38850797 | 0.009043276 | down |
| 164 | TCONS_00177463 | 0 | 0.210727 | -10.44399974 | 0.015403537 | down |
| 165 | 1700086O06Rik-202 | 0 | 0.24446 | -10.48018079 | 0.005857859 | down |
| 166 | Gm26672-203 | 0 | 0.191438 | -10.5342259 | 0.03694801 | down |
| 167 | Haus8-208 | 0 | 0.197955 | -10.68792468 | 0.004231886 | down |
| 168 | Gm20275-201 | 0 | 0.035895667 | -10.97578346 | 0.006676695 | down |
| 169 | Gm5086-201 | 0 | 0.183425 | -11.10743111 | 0.048784869 | down |
| 170 | 5530601H04Rik-213 | 0 | 0.172879667 | -11.11962859 | 0.002222301 | down |
| 171 | Gm49575-201 | 0 | 0.01954 | -11.14428823 | 0.047486573 | down |
| 172 | Tnfaip8-209 | 0 | 0.038483667 | -11.21553436 | 0.049955901 | down |
| 173 | Tnfaip8-201 | 0 | 0.068343 | -11.22565905 | 0.045412486 | down |
| 174 | 4921528I07Rik-202 | 0 | 0.062709333 | -11.24175914 | 0.045348902 | down |
| 175 | Rprd1b-208 | 0 | 0.102240667 | -11.30143216 | 0.002358623 | down |
| 176 | TCONS_00257140 | 0 | 0.278207667 | -11.33550759 | 0.00200314 | down |
| 177 | TCONS_00087827 | 0 | 0.175682 | -11.35453046 | 0.043136686 | down |
| 178 | Tbc1d23-210 | 0 | 0.643499 | -11.38662189 | 0.041757619 | down |
| 179 | Cadps2-210 | 0 | 0.106526 | -11.39203158 | 0.001803637 | down |
| 180 | Gm15406-201 | 0 | 0.117384 | -11.41637284 | 0.041478525 | down |
| 181 | Gm15680-201 | 0 | 0.049983667 | -11.42513905 | 0.041285741 | down |
| 182 | Eda2r-203 | 0 | 0.142682 | -11.4453238 | 0.001548222 | down |
| 183 | TCONS_00058513 | 0 | 0.851861333 | -11.47860461 | 0.001350614 | down |
| 184 | Gm45844-203 | 0 | 0.144708667 | -11.6335406 | 0.038038683 | down |
| 185 | Lrp8-219 | 0 | 0.158225333 | -11.70347114 | 0.001180316 | down |
| 186 | D130079A08Rik-201 | 0 | 0.084694667 | -11.72918854 | 0.041637784 | down |
| 187 | Skap1-208 | 0 | 0.033140667 | -11.74235933 | 0.040105975 | down |
| 188 | Gm10684-202 | 0 | 0.283016 | -11.76798347 | 0.041769611 | down |
| 189 | Gm47715-201 | 0 | 0.242459667 | -11.86038215 | 0.036562475 | down |
| 190 | Lingo1-208 | 0 | 0.089726 | -11.86885361 | 0.000917141 | down |
| 191 | Cldn34c1-205 | 0 | 0.177165 | -11.91303463 | 0.03436466 | down |
| 192 | TCONS_00009436 | 0 | 0.136049 | -11.98612265 | 0.00092101 | down |
| 193 | TCONS_00284017 | 0 | 0.261839 | -11.99274496 | 0.035093601 | down |
| 194 | TCONS_00261817 | 0 | 0.196705 | -12.06743811 | 0.00080162 | down |
| 195 | Sox2ot-204 | 0 | 0.017414667 | -12.18911238 | 0.030096407 | down |
| 196 | E130114P18Rik-205 | 0 | 0.096689 | -12.1900271 | 0.000650736 | down |
| 197 | Gm28403-201 | 0 | 0.051612667 | -12.20324548 | 0.028538752 | down |
| 198 | Ninl-203 | 0 | 0.263738667 | -12.53273603 | 0.000831331 | down |
| 199 | TCONS_00167145 | 0 | 0.165077667 | -12.55818748 | 0.000416848 | down |
| 200 | TCONS_00144902 | 0 | 0.366373 | -12.65331225 | 0.000419226 | down |
| 201 | Acer2-203 | 0 | 0.229820667 | -12.66982906 | 0.021696904 | down |
| 202 | Ptprt-206 | 0 | 0.141177 | -12.80982392 | 0.000369464 | down |
| 203 | Cars2-211 | 0 | 0.643061333 | -13.15167183 | 0.007058737 | down |
| 204 | Dnajc24-204 | 0 | 0.545066667 | -13.24115335 | 0.014433983 | down |
| 205 | Farp1-204 | 0 | 0.142100333 | -13.24860566 | 0.013966713 | down |
| 206 | TCONS_00081846 | 0 | 0.243275667 | -13.30718558 | 0.013738707 | down |
| 207 | Exosc10-206 | 0 | 0.979312333 | -13.45591012 | 0.01900716 | down |
| 208 | TCONS_00090863 | 0 | 0.386006 | -13.55517754 | 0.012781274 | down |
| 209 | Pank2-201 | 0 | 1.227632667 | -13.61613556 | 0.010299914 | down |
| 210 | Ppp2r2d-209 | 0 | 2.492796667 | -14.0244295 | 0.008822454 | down |
| 211 | Opcml-203 | 0 | 0.170012667 | -14.31216738 | 0.005325241 | down |
| 212 | TCONS_00110517 | 0 | 0.214166333 | -14.82804483 | 0.003331952 | down |
| 213 | Hsd17b12-202 | 0 | 0.612789667 | -15.160104 | 0.047836386 | down |
| 214 | Zbtb20-211 | 0 | 0.132612 | -15.42973901 | 0.04241255 | down |
| 215 | TCONS_00257642 | 0 | 2.554573 | -15.46959538 | 0.042357048 | down |
| 216 | Mtss1-211 | 0 | 1.987125 | -16.36388394 | 0.033066382 | down |

Note: The lncRNAs with “TCONS” in their names are novel lncRNAs determined in the TG of CCI-ION mice.

**Supplementary Table 5 The detailed information of the DE circRNAs in the TG of CCI-ION mice**

| **No.** | **circRNA_name** | **D7CCI_TPM** | **S_TPM** | │log2FC│≥1 | ***P* value** | **up-down** |
| --- | --- | --- | --- | --- | --- | --- |
| 1 | novel_circ_0003759 | 3065.316581 | 0 | 7.3065 | 1.44E-07 | up |
| 2 | novel_circ_0004134 | 701.1821356 | 0 | 5.2298 | 0.0067867 | up |
| 3 | mmu_circ_0000016 | 639.2473405 | 0 | 5.0345 | 0.011325 | up |
| 4 | novel_circ_0003251 | 552.5517828 | 0 | 4.8094 | 0.023598 | up |
| 5 | novel_circ_0002550 | 544.1681353 | 0 | 4.7185 | 0.028517 | up |
| 6 | novel_circ_0001011 | 478.1885816 | 0 | 4.6677 | 0.032756 | up |
| 7 | novel_circ_0003757 | 463.7933892 | 0 | 4.5781 | 0.039 | up |
| 8 | mmu_circ_0000041 | 738.6805711 | 66.68667267 | 3.495 | 0.045824 | up |
| 9 | novel_circ_0000009 | 1021.642134 | 100.030009 | 3.3505 | 0.026644 | up |
| 10 | novel_circ_0003203 | 99.43323059 | 1032.580465 | -3.169 | 0.038991 | down |
| 11 | mmu_circ_0001231 | 0 | 545.3171165 | -4.63 | 0.033257 | down |
| 12 | novel_circ_0000530 | 0 | 561.3946426 | -4.6811 | 0.031798 | down |
| 13 | mmu_circ_0000668 | 0 | 689.6851586 | -4.9726 | 0.013675 | down |
| 14 | mmu_circ_0001042 | 0 | 739.9350593 | -5.0616 | 0.010756 | down |

**Supplementary Table 6 The detailed information of the DE mRNAs in the TG of CCI-ION mice**

| **No.** | **mRNA_name** | **D7CCI_FPKM** | **S_FPKM** | │log2FC│≥1 | **Adjusted *P* value** | **up-down** |
| --- | --- | --- | --- | --- | --- | --- |
| 1 | Dlg2-219 | 4.016168333 | 0 | 20.56288969 | 0.015035067 | up |
| 2 | Synpr-201 | 7.442354333 | 0 | 20.22096563 | 0.015577432 | up |
| 3 | Phactr1-205 | 4.914237667 | 0 | 20.09083033 | 5.00E-06 | up |
| 4 | Nptn-206 | 25.12236267 | 0 | 19.66137843 | 0.017594812 | up |
| 5 | Macf1-201 | 4.819422 | 0 | 19.55575831 | 0.000139174 | up |
| 6 | Frmd4a-202 | 3.175743 | 0 | 19.47185547 | 0.017691234 | up |
| 7 | Gnas-209 | 29.25891867 | 0 | 19.34646777 | 0.018472286 | up |
| 8 | Rims1-203 | 2.043995333 | 0 | 18.96789443 | 0.000183057 | up |
| 9 | Cacna1a-213 | 2.701201667 | 0 | 18.58410518 | 0.00022424 | up |
| 10 | Vps53-202 | 5.545433667 | 0 | 18.40155259 | 0.021722253 | up |
| 11 | Dlgap4-205 | 4.461402667 | 0 | 18.31549013 | 0.00025817 | up |
| 12 | Ank2-207 | 2.240909333 | 0 | 18.30149849 | 0.000255449 | up |
| 13 | Gtf2i-206 | 8.915170667 | 0 | 18.2723875 | 0.021805524 | up |
| 14 | Gnas-201 | 10.243918 | 0 | 17.83237555 | 0.024340916 | up |
| 15 | Gm20431-201 | 9.002690667 | 0 | 17.78726693 | 0.02462809 | up |
| 16 | Paip2-204 | 21.787287 | 0 | 17.57314987 | 7.21E-13 | up |
| 17 | Cep128-210 | 0.991684667 | 0 | 17.47841681 | 0.000392004 | up |
| 18 | Tjp2-201 | 2.875440667 | 0 | 17.40406564 | 0.026469081 | up |
| 19 | Zeb2-221 | 2.504166333 | 0 | 17.02427987 | 0.029538552 | up |
| 20 | Prkn-215 | 0.212536333 | 0 | 16.88464248 | 0.00060217 | up |
| 21 | Grin2a-201 | 0.508263333 | 0 | 16.6755273 | 0.031046806 | up |
| 22 | Snrk-203 | 4.084731333 | 0 | 16.59407729 | 0.031733627 | up |
| 23 | Mark2-215 | 3.071969667 | 0 | 16.53956483 | 3.41E-09 | up |
| 24 | Slc6a4-201 | 5.882088667 | 0 | 16.52071628 | 1.70E-11 | up |
| 25 | Col15a1-201 | 1.924570667 | 0 | 16.5111643 | 0.032430136 | up |
| 26 | Dock4-204 | 0.454436667 | 0 | 16.4614147 | 0.032715085 | up |
| 27 | Chl1-205 | 1.260257333 | 0 | 16.45981722 | 1.45E-09 | up |
| 28 | Mef2c-218 | 1.105657667 | 0 | 16.39279584 | 0.000989985 | up |
| 29 | Myh11-202 | 1.917262667 | 0 | 16.38981108 | 0.000882171 | up |
| 30 | Dtnb-223 | 0.911145667 | 0 | 16.32393257 | 0.03436466 | up |
| 31 | Anks1b-221 | 0.428875667 | 0 | 16.30626636 | 0.000862778 | up |
| 32 | Bean1-203 | 3.352293667 | 0 | 16.30341376 | 0.018039709 | up |
| 33 | Myh4-202 | 8.182736667 | 0 | 16.19296963 | 0.034584229 | up |
| 34 | Eml4-203 | 1.166897333 | 0 | 16.12638367 | 0.000999774 | up |
| 35 | Sh3pxd2a-202 | 0.745206333 | 0 | 16.09104619 | 7.95E-11 | up |
| 36 | Celf2-209 | 0.182325333 | 0 | 16.05143732 | 7.86E-10 | up |
| 37 | Acap2-201 | 1.225095667 | 0 | 16.01372027 | 0.036338284 | up |
| 38 | Cacna1a-202 | 0.609185 | 0 | 15.99543885 | 0.001119438 | up |
| 39 | Ccnd3-215 | 1.429893333 | 0 | 15.95068412 | 0.037584666 | up |
| 40 | Pfdn4-202 | 5.888191667 | 0 | 15.94797907 | 1.50E-10 | up |
| 41 | Fancc-202 | 1.139383667 | 0 | 15.94220579 | 0.03694801 | up |
| 42 | Kcnma1-220 | 0.179361667 | 0 | 15.9006301 | 0.001129803 | up |
| 43 | Frmd4a-213 | 0.48196 | 0 | 15.88639527 | 0.037496371 | up |
| 44 | Papss2-202 | 1.846114 | 0 | 15.87516286 | 2.32E-08 | up |
| 45 | Anks1b-224 | 0.314275667 | 0 | 15.86485951 | 0.001127691 | up |
| 46 | Cacna1d-214 | 0.397740667 | 0 | 15.82737638 | 0.001350614 | up |
| 47 | Mpp6-201 | 1.341788333 | 0 | 15.80627738 | 0.001172845 | up |
| 48 | Dlgap2-208 | 0.171955333 | 0 | 15.78769257 | 0.001977792 | up |
| 49 | Ophn1-205 | 0.734543 | 0 | 15.78070292 | 0.001172845 | up |
| 50 | Smtn-204 | 5.955598333 | 0 | 15.75866101 | 0.039080093 | up |
| 51 | Ambra1-204 | 0.576007667 | 0 | 15.71984008 | 0.03885692 | up |
| 52 | Adamtsl1-212 | 0.186391 | 0 | 15.70292902 | 7.70E-10 | up |
| 53 | Slc45a4-205 | 4.100956667 | 0 | 15.56651211 | 0.002894984 | up |
| 54 | Ncam1-203 | 0.363323 | 0 | 15.55858405 | 0.041140562 | up |
| 55 | Dctn6-203 | 5.763570333 | 0 | 15.52455709 | 0.001500202 | up |
| 56 | Chd5-205 | 1.835284333 | 0 | 15.46556883 | 3.09E-09 | up |
| 57 | Grm1-202 | 0.230468 | 0 | 15.45392513 | 0.042913804 | up |
| 58 | Ryr1-201 | 0.741603333 | 0 | 15.34959892 | 0.044960833 | up |
| 59 | Slfn4-202 | 5.980313667 | 0 | 15.32657566 | 0.003855071 | up |
| 60 | Mid1-205 | 0.775819 | 0 | 15.32155065 | 1.34E-08 | up |
| 61 | Traf3-202 | 0.802037667 | 0 | 15.29018312 | 0.045636028 | up |
| 62 | Osbpl6-203 | 0.449454 | 0 | 15.28800062 | 0.046678057 | up |
| 63 | Prkar2a-206 | 1.562615333 | 0 | 15.26556649 | 0.046369626 | up |
| 64 | Pcdh15-236 | 0.095038333 | 0 | 15.24458212 | 0.046835391 | up |
| 65 | Lrrc7-201 | 0.160346333 | 0 | 15.20847973 | 0.003707992 | up |
| 66 | Hecw2-201 | 0.210498 | 0 | 15.20480133 | 0.047758838 | up |
| 67 | Arhgef10-207 | 1.429420667 | 0 | 15.16956489 | 0.048192112 | up |
| 68 | Atxn7l1-204 | 0.350038 | 0 | 15.16320414 | 0.002382505 | up |
| 69 | Mybpc1-201 | 0.893513667 | 0 | 15.12799709 | 0.007591182 | up |
| 70 | Cnot7-206 | 3.877441 | 0 | 15.07852391 | 0.002597244 | up |
| 71 | Kcnma1-214 | 0.101477333 | 0 | 15.06882182 | 0.002597244 | up |
| 72 | Anks1b-215 | 0.211208 | 0 | 15.05872722 | 0.007058737 | up |
| 73 | Cacna1d-207 | 0.224534 | 0 | 15.04964492 | 0.002765755 | up |
| 74 | Tnip1-205 | 1.357963 | 0 | 15.04088023 | 0.0026415 | up |
| 75 | Gm14434-202 | 5.877616 | 0 | 15.04023292 | 4.80E-08 | up |
| 76 | Inpp4b-203 | 0.179634333 | 0 | 15.02330447 | 0.002786147 | up |
| 77 | Spats2l-203 | 0.406528 | 0 | 14.99077907 | 0.002786147 | up |
| 78 | Ift43-201 | 0.842290333 | 0 | 14.99073423 | 0.002786147 | up |
| 79 | Palld-206 | 0.880389333 | 0 | 14.96693589 | 0.002894984 | up |
| 80 | Pik3cd-204 | 1.330872 | 0 | 14.93737893 | 6.12E-08 | up |
| 81 | Ripor2-203 | 0.678409 | 0 | 14.81720167 | 4.07E-06 | up |
| 82 | Eml4-205 | 0.469057333 | 0 | 14.81157384 | 0.003399898 | up |
| 83 | Sorbs2-202 | 0.703021667 | 3.33E-07 | 14.79291039 | 0.042913804 | up |
| 84 | Phactr1-214 | 0.124877667 | 0 | 14.77877555 | 0.00951588 | up |
| 85 | Rara-203 | 1.210197 | 0 | 14.7532557 | 0.004898033 | up |
| 86 | Rbm47-205 | 0.438044667 | 0 | 14.75035334 | 0.003658148 | up |
| 87 | Trpm3-207 | 0.103214667 | 0 | 14.7494957 | 0.006162703 | up |
| 88 | Ikbkg-218 | 0.947259 | 0 | 14.73343752 | 1.96E-07 | up |
| 89 | Dglucy-208 | 0.614574667 | 0 | 14.65310781 | 0.004333237 | up |
| 90 | Col9a3-201 | 2.175606 | 0 | 14.56828112 | 0.006207795 | up |
| 91 | Snx10-204 | 0.867315333 | 0 | 14.53243342 | 0.004939082 | up |
| 92 | Csnk1e-213 | 1.655787 | 0 | 14.47864751 | 2.10E-06 | up |
| 93 | Erbin-204 | 0.469796667 | 0 | 14.47764232 | 0.004815876 | up |
| 94 | Zfp426-213 | 1.945912333 | 0 | 14.45444681 | 2.07E-05 | up |
| 95 | Cit-202 | 0.293521 | 0 | 14.41249435 | 0.005312528 | up |
| 96 | Brpf3-218 | 1.387270333 | 0 | 14.34102011 | 1.42E-06 | up |
| 97 | Bnc2-207 | 0.112301 | 0 | 14.29917774 | 2.10E-06 | up |
| 98 | Gda-204 | 0.878535 | 0 | 14.24486802 | 0.008119345 | up |
| 99 | Rgs20-203 | 0.381929667 | 0 | 14.22931029 | 0.010324744 | up |
| 100 | Frmd5-207 | 0.157664667 | 0 | 14.22126825 | 0.001500202 | up |
| 101 | Shank2-201 | 0.253944667 | 0 | 14.07446463 | 0.023619163 | up |
| 102 | Ccny-202 | 0.267201333 | 0 | 14.07424274 | 0.006900696 | up |
| 103 | Pcdh15-201 | 0.042932667 | 0 | 14.00487355 | 1.24E-05 | up |
| 104 | Car1-203 | 0.839943667 | 0 | 14.00003842 | 0.011723769 | up |
| 105 | Mcf2-202 | 0.266269333 | 0 | 13.98814515 | 0.015516752 | up |
| 106 | Sp100-211 | 0.660577333 | 0 | 13.96896776 | 0.007839714 | up |
| 107 | Stard10-204 | 1.290288 | 0 | 13.92233569 | 0.009882031 | up |
| 108 | Dmtn-203 | 1.277578 | 0 | 13.89776644 | 0.008229929 | up |
| 109 | Olfm2-203 | 0.395411333 | 0 | 13.87341238 | 6.95E-05 | up |
| 110 | Ldb3-204 | 0.523961 | 0 | 13.86914792 | 1.58E-05 | up |
| 111 | Sox6-212 | 0.086291333 | 0 | 13.86791579 | 2.33E-05 | up |
| 112 | Tmc5-202 | 0.412842 | 0 | 13.86109367 | 0.010422599 | up |
| 113 | Sirpa-204 | 0.800581667 | 0 | 13.83823105 | 0.008833015 | up |
| 114 | Relch-202 | 0.340148 | 0 | 13.82836355 | 0.008779405 | up |
| 115 | Tcf4-245 | 0.137816 | 0 | 13.7961155 | 0.009731854 | up |
| 116 | Stum-205 | 0.615968333 | 0 | 13.74016192 | 4.23E-05 | up |
| 117 | Patj-214 | 0.091322 | 0 | 13.73882718 | 0.038808859 | up |
| 118 | Ecel1-203 | 3.318586333 | 0 | 13.71720968 | 1.24E-05 | up |
| 119 | Atl2-202 | 0.543539333 | 0 | 13.64887161 | 0.017009896 | up |
| 120 | Tpm4-203 | 1.519946333 | 0 | 13.63835513 | 0.010326684 | up |
| 121 | Cacnb2-202 | 0.225454667 | 0 | 13.57731572 | 0.010858539 | up |
| 122 | Cacna1d-209 | 0.079780333 | 0 | 13.54723787 | 0.010966855 | up |
| 123 | Kcnma1-213 | 0.31814 | 2.17E-05 | 13.54235886 | 0.003516478 | up |
| 124 | Lrp8-201 | 0.347393667 | 0 | 13.53387218 | 2.15E-05 | up |
| 125 | Igsf10-202 | 0.942534 | 0 | 13.52603171 | 0.011956781 | up |
| 126 | Ero1lb-201 | 2.146522333 | 0 | 13.5052604 | 0.003163036 | up |
| 127 | Ugt1a8-201 | 0.183537 | 0 | 13.49901606 | 0.011481879 | up |
| 128 | Htr2c-201 | 0.098439 | 0 | 13.46814279 | 0.014180147 | up |
| 129 | Cd226-206 | 0.344552333 | 0 | 13.46573079 | 0.014939793 | up |
| 130 | Acox1-202 | 0.897211 | 0 | 13.46484566 | 0.020688402 | up |
| 131 | Gm14308-203 | 1.913424667 | 0 | 13.46441988 | 0.012383479 | up |
| 132 | Mef2c-228 | 0.556275667 | 0 | 13.4390198 | 0.005807137 | up |
| 133 | Ugt1a7c-204 | 0.190341 | 0 | 13.41903124 | 3.11E-05 | up |
| 134 | Ripor2-202 | 0.383432333 | 0 | 13.40043222 | 0.012476391 | up |
| 135 | Denr-202 | 1.147404667 | 0 | 13.38575348 | 3.88E-05 | up |
| 136 | Heph-201 | 0.186563 | 0 | 13.34058402 | 0.014180147 | up |
| 137 | N4bp2-206 | 0.413790333 | 0 | 13.34051085 | 0.014156353 | up |
| 138 | Dipk2b-201 | 0.497267667 | 0 | 13.27946348 | 0.014156353 | up |
| 139 | Rad50-202 | 0.830116 | 0 | 13.26232714 | 0.018503142 | up |
| 140 | Aqp9-202 | 0.400802 | 0 | 13.25553289 | 0.016711919 | up |
| 141 | Matn3-201 | 0.866519 | 0 | 13.2384305 | 0.021792431 | up |
| 142 | Nfyc-206 | 0.328721 | 0 | 13.22760945 | 0.014774014 | up |
| 143 | Atp8b4-202 | 0.121323 | 0 | 13.21365923 | 0.028779914 | up |
| 144 | Ikbkg-217 | 0.326948667 | 0 | 13.1917645 | 7.05E-05 | up |
| 145 | Mtdh-206 | 0.365297333 | 0 | 13.19075811 | 0.015403537 | up |
| 146 | Tcf4-243 | 0.123054333 | 0 | 13.17526252 | 0.015230055 | up |
| 147 | Shisa5-204 | 3.398607 | 0 | 13.16696292 | 0.015230055 | up |
| 148 | Nae1-211 | 0.789791 | 0 | 13.1478878 | 0.015864902 | up |
| 149 | Mov10-207 | 0.828509333 | 0 | 13.14480225 | 0.015516752 | up |
| 150 | Acad10-202 | 0.483943667 | 0 | 13.14193061 | 0.015855482 | up |
| 151 | Aatk-202 | 14.73886867 | 0.001239333 | 13.1279606 | 0.023425497 | up |
| 152 | Prrc2c-212 | 0.569911333 | 0 | 13.10768352 | 0.000416848 | up |
| 153 | Metap2-210 | 0.650144333 | 0 | 13.10106533 | 0.032533386 | up |
| 154 | Slc8a1-203 | 0.071533667 | 0 | 13.09484967 | 0.039307205 | up |
| 155 | Zfp462-204 | 0.293176 | 0 | 13.08454413 | 0.027983238 | up |
| 156 | Sorbs2-205 | 0.205592667 | 0 | 13.07017388 | 0.000111124 | up |
| 157 | Rpap2-202 | 0.388008333 | 0 | 13.04250153 | 0.016415373 | up |
| 158 | Eno3-201 | 3.362895333 | 0 | 13.01305675 | 0.026376325 | up |
| 159 | Shtn1-202 | 0.169583667 | 0 | 12.98795805 | 0.01804041 | up |
| 160 | Car12-202 | 0.320406333 | 0 | 12.983716 | 0.017271665 | up |
| 161 | Mfhas1-203 | 0.195336333 | 0 | 12.97092645 | 0.01878208 | up |
| 162 | Efcab11-201 | 0.096513 | 0 | 12.93203313 | 0.018913276 | up |
| 163 | Lrrfip1-204 | 0.206288 | 0 | 12.89709499 | 0.003677653 | up |
| 164 | Txnrd2-216 | 0.307644 | 0 | 12.87874376 | 0.01878208 | up |
| 165 | Zeb2-224 | 0.179669 | 0 | 12.87548655 | 0.018503142 | up |
| 166 | Trpc7-208 | 0.125416667 | 0 | 12.86494895 | 0.019550575 | up |
| 167 | Wdr62-201 | 0.385885333 | 0 | 12.8445704 | 0.019403774 | up |
| 168 | Nrg1-202 | 0.079058667 | 0 | 12.83865068 | 0.018913276 | up |
| 169 | Hspb11-204 | 0.552862667 | 0 | 12.81412772 | 0.040954407 | up |
| 170 | Fnbp1-202 | 0.132033667 | 0 | 12.75898928 | 0.020264962 | up |
| 171 | Acvr1c-204 | 0.174472333 | 0 | 12.73991579 | 0.021435539 | up |
| 172 | Bpifb1-202 | 0.478037 | 0 | 12.69150894 | 0.032434003 | up |
| 173 | Lrp8-204 | 0.199323333 | 0 | 12.68305672 | 0.000416848 | up |
| 174 | Il1rl1-201 | 0.569064667 | 0 | 12.68020511 | 0.001391027 | up |
| 175 | Lin54-201 | 0.236489667 | 0 | 12.67188839 | 0.029822047 | up |
| 176 | Ccn5-201 | 1.133027667 | 0 | 12.66867727 | 0.000369464 | up |
| 177 | Fblim1-203 | 0.459910333 | 0 | 12.63971292 | 0.040057621 | up |
| 178 | Nrip1-208 | 0.169803333 | 0 | 12.63714889 | 0.000308864 | up |
| 179 | Zfp568-202 | 0.301482667 | 0 | 12.59242564 | 0.02265711 | up |
| 180 | Cga-201 | 0.919554333 | 0 | 12.59142005 | 0.031046806 | up |
| 181 | BC004004-211 | 0.467009 | 0 | 12.57430736 | 0.000258752 | up |
| 182 | Anapc7-203 | 0.554713 | 0 | 12.56496335 | 0.025054743 | up |
| 183 | Oas2-201 | 0.659804 | 0 | 12.55804283 | 0.034476278 | up |
| 184 | Clec3a-201 | 1.678017 | 0 | 12.55793919 | 0.031313552 | up |
| 185 | Zbtb5-204 | 0.586156333 | 0 | 12.54248107 | 0.023615145 | up |
| 186 | Ppp2r3a-201 | 0.136198667 | 0 | 12.5363983 | 0.023619163 | up |
| 187 | Poc1a-206 | 0.176607333 | 0 | 12.47331018 | 0.024340916 | up |
| 188 | 4931406C07Rik-208 | 0.530410667 | 0 | 12.46777862 | 0.025357431 | up |
| 189 | Liph-202 | 0.290127667 | 0 | 12.45131341 | 0.000648938 | up |
| 190 | Rtp4-203 | 2.534408333 | 0 | 12.42301626 | 0.034078415 | up |
| 191 | Bptf-202 | 0.110317667 | 0 | 12.3743338 | 0.027136718 | up |
| 192 | Mad2l2-202 | 0.756933333 | 0 | 12.36450176 | 0.000521652 | up |
| 193 | Stil-201 | 0.263514667 | 0 | 12.35822117 | 0.047836386 | up |
| 194 | Pdp1-204 | 1.663235667 | 0 | 12.34619927 | 0.000444588 | up |
| 195 | Npnt-204 | 0.163522333 | 0 | 12.32675663 | 0.000416848 | up |
| 196 | Ly6a-202 | 3.513264333 | 0 | 12.30419106 | 0.027613755 | up |
| 197 | Senp8-207 | 0.759139667 | 0 | 12.29363949 | 0.00115235 | up |
| 198 | Gm14434-203 | 1.048134667 | 0 | 12.26748145 | 0.000419226 | up |
| 199 | Cyp4f17-204 | 0.42827 | 0 | 12.260769 | 0.028371682 | up |
| 200 | Adam32-201 | 0.087119333 | 0 | 12.24982022 | 0.048281372 | up |
| 201 | Stmn4-209 | 0.839013 | 0 | 12.24637615 | 0.039307205 | up |
| 202 | Col11a2-211 | 0.391128333 | 0 | 12.2337684 | 0.030296709 | up |
| 203 | Tspan12-205 | 0.589201667 | 0 | 12.23167307 | 0.029465569 | up |
| 204 | Gadl1-203 | 0.072849333 | 0 | 12.22142277 | 0.028453543 | up |
| 205 | Tbxas1-203 | 0.170978667 | 0 | 12.21784288 | 0.029538552 | up |
| 206 | Glis3-202 | 0.03008 | 0 | 12.20388779 | 0.000547633 | up |
| 207 | Dnmbp-203 | 0.228044667 | 0 | 12.19605096 | 0.029822047 | up |
| 208 | Slc33a1-203 | 0.308126667 | 0 | 12.19026862 | 0.002894984 | up |
| 209 | Jakmip1-207 | 0.151394333 | 0 | 12.17538934 | 0.044984007 | up |
| 210 | Rufy3-202 | 0.167867333 | 0 | 12.1751673 | 0.029822047 | up |
| 211 | Gm29394-203 | 0.204868667 | 0 | 12.11287962 | 0.00065803 | up |
| 212 | Klrb1a-202 | 0.683901 | 0 | 12.0703958 | 0.031853514 | up |
| 213 | Anapc5-205 | 0.26634 | 0 | 12.02514349 | 0.033007819 | up |
| 214 | Irf5-201 | 0.832224 | 0 | 12.02502747 | 0.047758838 | up |
| 215 | Nxt2-204 | 0.691848333 | 0 | 12.01928911 | 0.033768854 | up |
| 216 | Tcf4-233 | 0.038324333 | 0 | 12.00389042 | 0.044775275 | up |
| 217 | Dbf4-201 | 0.342620667 | 0 | 11.99402769 | 0.030594837 | up |
| 218 | Chrm1-201 | 0.469521333 | 0 | 11.98095252 | 0.002577768 | up |
| 219 | Myb-201 | 0.239916667 | 0 | 11.95324299 | 0.049431598 | up |
| 220 | Slc28a2-202 | 0.415574667 | 0 | 11.94717169 | 0.040575348 | up |
| 221 | Emilin2-201 | 0.144464333 | 0 | 11.94690306 | 0.03415612 | up |
| 222 | Tmem168-206 | 0.298229 | 0 | 11.93864318 | 0.033052182 | up |
| 223 | Clec4n-201 | 0.480573333 | 0 | 11.90581185 | 0.03436466 | up |
| 224 | Lmo7-202 | 0.137936 | 0 | 11.88490664 | 0.000951356 | up |
| 225 | Tyro3-202 | 0.387055667 | 0 | 11.88441745 | 0.034584229 | up |
| 226 | Cdc26-202 | 0.542395667 | 0 | 11.86640051 | 0.03997614 | up |
| 227 | Dhdds-202 | 0.268956333 | 0 | 11.84950415 | 0.035176349 | up |
| 228 | Elf1-202 | 0.115823 | 0 | 11.84276007 | 0.00252842 | up |
| 229 | Dmpk-202 | 0.792740667 | 0 | 11.83870313 | 0.036065193 | up |
| 230 | Agfg1-202 | 0.13115 | 0 | 11.80784146 | 0.035176349 | up |
| 231 | Cyth1-207 | 0.275681 | 0 | 11.80667156 | 0.001532154 | up |
| 232 | Lmx1b-203 | 0.100246667 | 0 | 11.79697403 | 0.043523183 | up |
| 233 | H3f3a-201 | 0.671118333 | 0 | 11.7693845 | 0.03676174 | up |
| 234 | Zfp946-201 | 2.615514 | 0.000603667 | 11.75101368 | 2.10E-06 | up |
| 235 | Wdr27-208 | 0.064966333 | 0 | 11.74918473 | 0.03694801 | up |
| 236 | Dhrs3-202 | 0.211305667 | 0 | 11.74501234 | 0.038169464 | up |
| 237 | Myl6-205 | 2.424589667 | 0 | 11.74076365 | 0.038808859 | up |
| 238 | Ucma-202 | 0.769658 | 0 | 11.73900953 | 0.049316431 | up |
| 239 | Slc14a1-202 | 0.328774667 | 0 | 11.69167222 | 0.009882031 | up |
| 240 | Kcnab2-204 | 0.155268667 | 0 | 11.6876766 | 0.038689964 | up |
| 241 | Gm281-201 | 0.070470333 | 0 | 11.68232662 | 0.040082897 | up |
| 242 | Matr3-215 | 0.234563667 | 0 | 11.66378127 | 0.040959464 | up |
| 243 | Dnajc13-203 | 5.222370333 | 0.001371333 | 11.64558565 | 0.010908595 | up |
| 244 | Slc22a8-202 | 0.317228 | 0 | 11.63220532 | 0.002052374 | up |
| 245 | Gtse1-201 | 0.400928667 | 0 | 11.6175124 | 0.045636028 | up |
| 246 | Sparc-208 | 0.228595 | 0 | 11.56032167 | 0.040014052 | up |
| 247 | Espn-213 | 0.201398 | 0 | 11.55326683 | 0.040105975 | up |
| 248 | Rhoh-202 | 0.208273333 | 0 | 11.55227187 | 0.00310342 | up |
| 249 | Hsf4-207 | 1.110251333 | 0 | 11.54763271 | 0.040575348 | up |
| 250 | Grid2ip-201 | 0.227936 | 0 | 11.54734909 | 0.042705749 | up |
| 251 | 1700028P14Rik-201 | 0.065959667 | 0 | 11.5075646 | 0.044984007 | up |
| 252 | Sec16b-201 | 0.100583 | 0 | 11.49161956 | 0.042703747 | up |
| 253 | Gpr141-203 | 0.084533667 | 0 | 11.47353418 | 0.044117688 | up |
| 254 | Dclre1b-202 | 0.677292 | 0 | 11.46756153 | 0.001350614 | up |
| 255 | Spr-203 | 1.473676 | 0 | 11.45240975 | 0.044325363 | up |
| 256 | Strada-202 | 0.198001 | 0 | 11.44461297 | 0.001494103 | up |
| 257 | Ccm2l-205 | 0.366118667 | 0 | 11.4195492 | 0.001462644 | up |
| 258 | Lmo2-207 | 0.250877333 | 0 | 11.39474391 | 0.042915138 | up |
| 259 | Cdkn1b-203 | 1.166348333 | 0 | 11.38094861 | 0.001463064 | up |
| 260 | Dlgap5-201 | 0.185801667 | 0 | 11.3803368 | 0.002874388 | up |
| 261 | Nectin3-210 | 0.127152333 | 0 | 11.34617851 | 0.044325363 | up |
| 262 | Olfr56-201 | 0.034104667 | 0 | 11.34170047 | 0.044960833 | up |
| 263 | Kif28-201 | 0.110370333 | 0 | 11.32995865 | 0.044861905 | up |
| 264 | Ppp1cb-206 | 0.165259667 | 0 | 11.32680935 | 0.004022983 | up |
| 265 | Sec61g-201 | 0.826725 | 0 | 11.29684049 | 0.001723751 | up |
| 266 | Stx11-204 | 0.234130667 | 0 | 11.28106791 | 0.001808952 | up |
| 267 | Sh2d5-202 | 0.47216 | 0 | 11.27756123 | 0.044960833 | up |
| 268 | Tal1-203 | 0.396527 | 0 | 11.27220585 | 0.023247505 | up |
| 269 | Tcf19-202 | 1.281901333 | 0 | 11.27109529 | 0.045228744 | up |
| 270 | Rims1-208 | 0.504864 | 0.000124 | 11.23525344 | 0.046993099 | up |
| 271 | Map7-205 | 0.215978667 | 0 | 11.20600994 | 0.013041922 | up |
| 272 | Nelfb-206 | 0.714120667 | 0 | 11.20553369 | 0.047256634 | up |
| 273 | Tcf4-238 | 0.014430333 | 0 | 11.20305941 | 0.02803153 | up |
| 274 | Camkk2-206 | 0.194854333 | 0 | 11.19875414 | 0.002222301 | up |
| 275 | Rnf40-201 | 2.235477667 | 0.000271333 | 11.19584167 | 0.049019051 | up |
| 276 | Tmem255b-201 | 0.192356333 | 0 | 11.18235157 | 0.048915115 | up |
| 277 | Wt1-202 | 0.114469333 | 0 | 11.16266382 | 0.004358882 | up |
| 278 | Zfp202-203 | 0.224626667 | 0 | 11.1362787 | 0.048023465 | up |
| 279 | Gm14434-201 | 0.414336 | 0 | 11.09795362 | 0.015039402 | up |
| 280 | Tex16-203 | 0.055081667 | 0 | 11.07746395 | 0.049404324 | up |
| 281 | Lipn-202 | 0.707301 | 0 | 11.05071849 | 0.003041401 | up |
| 282 | Capn5-202 | 0.109732333 | 0 | 11.04184393 | 0.028006729 | up |
| 283 | Tmc4-202 | 0.405436 | 0 | 11.0314809 | 0.003533164 | up |
| 284 | Nwd1-204 | 1.581014 | 0.000630333 | 10.94821113 | 0.004853171 | up |
| 285 | Akap5-202 | 0.424463 | 0 | 10.83704807 | 0.015577432 | up |
| 286 | Tead2-201 | 0.212612 | 0 | 10.83284214 | 0.00347416 | up |
| 287 | Mpv17-209 | 0.296666667 | 0 | 10.82855074 | 0.003293918 | up |
| 288 | Eya4-203 | 0.048874333 | 0 | 10.8221575 | 0.003101523 | up |
| 289 | Cep41-207 | 0.119242667 | 0 | 10.80048421 | 0.018060839 | up |
| 290 | Prg3-201 | 0.675446333 | 0 | 10.7954186 | 0.040198948 | up |
| 291 | Mcemp1-201 | 1.054514667 | 0 | 10.74765067 | 0.01520522 | up |
| 292 | Cebpg-201 | 0.626855 | 0 | 10.72389286 | 0.003806934 | up |
| 293 | Lck-202 | 0.141231333 | 0 | 10.70024807 | 0.017925937 | up |
| 294 | Gm12695-201 | 0.057213667 | 0 | 10.69606281 | 0.007697324 | up |
| 295 | Nlrp3-203 | 0.639991667 | 0 | 10.67946811 | 0.004984404 | up |
| 296 | Ambn-201 | 0.26601 | 0 | 10.59485079 | 0.034078415 | up |
| 297 | Eef1d-204 | 4.136524333 | 0.002225667 | 10.5558396 | 2.10E-06 | up |
| 298 | Cdh26-201 | 0.054761667 | 0 | 10.51457327 | 0.016040987 | up |
| 299 | Cadps-203 | 0.939669333 | 0.000588 | 10.47960253 | 0.009127712 | up |
| 300 | Tmem229b-204 | 0.154178 | 0 | 10.44501675 | 0.004877081 | up |
| 301 | Sytl4-202 | 0.081467667 | 0 | 10.41024241 | 0.006162703 | up |
| 302 | Zfp663-201 | 0.323011 | 0 | 10.40698633 | 0.005174623 | up |
| 303 | Siglech-201 | 0.271727 | 0 | 10.38222241 | 0.006959187 | up |
| 304 | Amotl1-206 | 0.113033 | 0 | 10.37111166 | 0.044090634 | up |
| 305 | Rcbtb1-205 | 0.314465667 | 0 | 10.32988527 | 0.005664055 | up |
| 306 | Spp1-203 | 0.605144667 | 0 | 10.30534784 | 0.006292922 | up |
| 307 | Slc35d2-207 | 0.126673333 | 0 | 10.28571984 | 0.034476278 | up |
| 308 | Dennd2d-204 | 0.168130333 | 0 | 10.25081528 | 0.01520522 | up |
| 309 | Aptx-203 | 0.139550333 | 0 | 10.24771686 | 0.006162703 | up |
| 310 | Ear1-201 | 2.747253 | 0 | 10.12623415 | 0.032533386 | up |
| 311 | Fbxo9-201 | 7.330481 | 0.006551333 | 10.06956753 | 0.018634136 | up |
| 312 | Ntpcr-205 | 0.120504667 | 0 | 10.0334853 | 0.013057298 | up |
| 313 | Cxcr6-201 | 0.412547333 | 0 | 10.01704529 | 0.008248667 | up |
| 314 | Zfp385a-202 | 0.10129 | 0 | 9.975167491 | 0.021285681 | up |
| 315 | Etfb-205 | 10.95899833 | 0.009606333 | 9.936841198 | 0.034024415 | up |
| 316 | Scnn1b-201 | 0.036876667 | 0 | 9.891160359 | 0.010324744 | up |
| 317 | Gm5152-201 | 0.449649333 | 0 | 9.886651924 | 0.011224135 | up |
| 318 | Rnaseh2a-201 | 0.235538333 | 0 | 9.871339604 | 0.009967534 | up |
| 319 | Fcna-201 | 0.583955333 | 0 | 9.847264829 | 0.022490152 | up |
| 320 | Raet1e-204 | 0.076707667 | 0 | 9.844080937 | 0.011366236 | up |
| 321 | Clec5a-203 | 0.235520333 | 0 | 9.779865562 | 0.031928679 | up |
| 322 | Pde1c-206 | 0.452246333 | 0.000436667 | 9.738964115 | 0.008903182 | up |
| 323 | Gucy1b2-201 | 0.027416333 | 0 | 9.735377416 | 0.020791167 | up |
| 324 | Stum-201 | 1.49916 | 0.001683667 | 9.724929085 | 0.004198454 | up |
| 325 | Xpo7-206 | 3.267139333 | 0.003559 | 9.717930413 | 0.000416848 | up |
| 326 | Cinp-202 | 0.107530333 | 0 | 9.713029024 | 0.02265711 | up |
| 327 | Ankrd1-205 | 0.207875 | 0 | 9.640378493 | 0.024478494 | up |
| 328 | Zmat4-206 | 1.524536667 | 0.001892667 | 9.582539055 | 0.022943998 | up |
| 329 | Pxylp1-207 | 0.023328333 | 0 | 9.478109815 | 0.016675437 | up |
| 330 | Arhgap20-204 | 0.016902333 | 0 | 9.445283198 | 0.031332222 | up |
| 331 | Rnft2-204 | 0.188462 | 0 | 9.416137558 | 0.022841535 | up |
| 332 | Slfn8-203 | 0.076900667 | 0 | 9.405094907 | 0.018191409 | up |
| 333 | Rhoc-202 | 23.79052167 | 0.031907 | 9.382775154 | 2.97E-07 | up |
| 334 | Gm7298-201 | 0.024656 | 0 | 9.363311009 | 0.029538552 | up |
| 335 | Gphb5-201 | 0.272028 | 0 | 9.362005622 | 0.018431809 | up |
| 336 | Rps14-207 | 5.796081333 | 0.008543 | 9.359887733 | 0.015230055 | up |
| 337 | Pard3-205 | 0.050775 | 0 | 9.340258985 | 0.019299639 | up |
| 338 | Cd207-201 | 0.203820667 | 0 | 9.337403309 | 0.018974257 | up |
| 339 | Stum-202 | 0.030494333 | 0 | 9.334085076 | 0.038030127 | up |
| 340 | Lrr1-201 | 0.130479333 | 0 | 9.294227064 | 0.039433647 | up |
| 341 | Fam83b-202 | 0.015963667 | 0 | 9.205209698 | 0.024325739 | up |
| 342 | Wdr45-210 | 0.272727667 | 0 | 9.191628332 | 0.038229468 | up |
| 343 | Otulinl-204 | 0.225074667 | 0 | 9.18826515 | 0.02304245 | up |
| 344 | Setd1b-206 | 0.047952333 | 0 | 9.18451243 | 0.023573374 | up |
| 345 | Inava-201 | 0.055894667 | 0 | 9.148016885 | 0.036659098 | up |
| 346 | Pxylp1-202 | 0.017452667 | 0 | 9.135929306 | 0.033701912 | up |
| 347 | Mid1-214 | 0.116365667 | 8.73E-05 | 9.116471157 | 0.004939082 | up |
| 348 | Tespa1-202 | 0.178276667 | 0.000220667 | 9.070308838 | 0.007591182 | up |
| 349 | AA467197-202 | 0.352920333 | 0 | 9.052621903 | 0.030473946 | up |
| 350 | Mier2-210 | 0.197318333 | 0 | 9.03755802 | 0.029871525 | up |
| 351 | Prok2-203 | 0.074099 | 0 | 9.036956523 | 0.040057621 | up |
| 352 | Rasgrp4-202 | 0.055613667 | 0 | 9.010110452 | 0.045348902 | up |
| 353 | Tmem9b-202 | 7.651621667 | 0.014728333 | 8.993208916 | 0.000141834 | up |
| 354 | Mfsd4b5-202 | 0.036990667 | 0 | 8.98154808 | 0.028771317 | up |
| 355 | Gramd1a-214 | 5.222674667 | 0.006869667 | 8.932149947 | 0.014939793 | up |
| 356 | Gm3002-201 | 0.047049333 | 0 | 8.897913319 | 0.049019051 | up |
| 357 | Disp2-204 | 0.029893667 | 0 | 8.835485081 | 0.043330746 | up |
| 358 | Clrn1-202 | 0.427607333 | 0.000863 | 8.803139141 | 0.008478765 | up |
| 359 | Tacc3-207 | 0.158601 | 0 | 8.770306961 | 0.035485116 | up |
| 360 | Ephb2-201 | 0.550977333 | 0.001134333 | 8.760952184 | 0.032434003 | up |
| 361 | Cck-202 | 0.19011 | 0 | 8.757885234 | 0.039307205 | up |
| 362 | Grb2-205 | 0.017898667 | 0 | 8.7309185 | 0.042913804 | up |
| 363 | Sipa1-203 | 0.70066 | 0.000637333 | 8.726348028 | 0.004229455 | up |
| 364 | Zfand2a-205 | 0.143225 | 0 | 8.681535402 | 0.03918094 | up |
| 365 | Tpsb2-203 | 1.659301 | 0.001072 | 8.540359459 | 0.024228441 | up |
| 366 | Art3-215 | 4.671472667 | 0.012315333 | 8.438643376 | 0.010711573 | up |
| 367 | Npr2-203 | 0.228139667 | 0 | 8.425121577 | 0.049316431 | up |
| 368 | Clcf1-201 | 0.230981333 | 0.000526667 | 8.101113194 | 0.018191409 | up |
| 369 | Prg2-201 | 15.63155167 | 0.056916333 | 7.989971919 | 0.030166316 | up |
| 370 | Anxa10-201 | 1.326733 | 0.005296 | 7.872998324 | 0.03040683 | up |
| 371 | Tmem256-203 | 2.622508 | 0.004329667 | 7.658193788 | 0.015002273 | up |
| 372 | B4galt2-203 | 5.207158333 | 0.025960667 | 7.554545946 | 0.006558443 | up |
| 373 | Pign-201 | 0.120158667 | 0.000656667 | 7.41956766 | 0.048048992 | up |
| 374 | Ano1-202 | 1.117249333 | 0.006714667 | 7.349056811 | 0.018191409 | up |
| 375 | Rcan2-202 | 2.050177333 | 0.015296333 | 7.06470126 | 0.0453552 | up |
| 376 | Sprr1a-201 | 28.55701333 | 0.234930333 | 6.838343178 | 0.001627631 | up |
| 377 | Pld1-201 | 1.459266 | 0.012897 | 6.804339155 | 0.014774014 | up |
| 378 | Vip-201 | 7.296922667 | 0.072218 | 6.541198138 | 0.025292563 | up |
| 379 | Mgrn1-202 | 1.788052333 | 0.019194667 | 6.468502158 | 0.001282828 | up |
| 380 | Gtf2a1-202 | 0.259616667 | 0.002612 | 6.426707731 | 0.049431598 | up |
| 381 | Reep1-203 | 0.584459333 | 0.007584333 | 6.1409809 | 0.03831527 | up |
| 382 | Bcam-205 | 6.168574 | 0.082597 | 6.136158275 | 0.03436466 | up |
| 383 | Pkp4-203 | 2.685506333 | 0.038242333 | 6.087762422 | 0.000999774 | up |
| 384 | Cd177-201 | 4.460983333 | 0.068576 | 5.932389757 | 0.033768854 | up |
| 385 | Tpm3-204 | 2.859097 | 0.050261667 | 5.762276045 | 0.023468151 | up |
| 386 | Dcun1d2-201 | 5.539001667 | 0.102400667 | 5.668145992 | 0.009030327 | up |
| 387 | Ngp-201 | 34.94429733 | 0.696236 | 5.568976779 | 0.049833899 | up |
| 388 | Vps50-202 | 1.843552333 | 0.037136667 | 5.55078543 | 0.034910757 | up |
| 389 | Chil3-201 | 22.696911 | 0.497535667 | 5.437754528 | 0.03155577 | up |
| 390 | S100a8-201 | 178.287794 | 3.946779333 | 5.41759112 | 0.040014052 | up |
| 391 | Lipn-201 | 1.594669667 | 0.038589 | 5.285535369 | 0.038229468 | up |
| 392 | Chl1-203 | 1.524691667 | 0.038331 | 5.251397974 | 0.00261322 | up |
| 393 | Ltf-201 | 24.10393933 | 0.646478667 | 5.135988043 | 0.039079127 | up |
| 394 | Tial1-201 | 3.757709333 | 0.111276333 | 5.011826406 | 0.01520522 | up |
| 395 | Fut8-203 | 8.363958333 | 0.256312 | 4.996877298 | 0.018899673 | up |
| 396 | Dach1-202 | 3.042019 | 0.096127667 | 4.922001794 | 0.001088832 | up |
| 397 | Ddx6-201 | 33.143672 | 1.144587 | 4.770400985 | 0.024291443 | up |
| 398 | Cttn-201 | 18.64337567 | 0.964998 | 4.247272177 | 0.030893383 | up |
| 399 | Gal-202 | 63.91842233 | 3.496377333 | 4.139695792 | 0.020801705 | up |
| 400 | Ift140-205 | 2.736773333 | 0.170647 | 3.940782443 | 0.033861676 | up |
| 401 | Wwox-207 | 2.511353333 | 0.185039 | 3.710986579 | 0.027189151 | up |
| 402 | Svil-211 | 6.114259333 | 0.57035 | 3.371053438 | 0.040495036 | up |
| 403 | Phc2-201 | 0.401219667 | 5.933160667 | -3.938490864 | 0.029931177 | down |
| 404 | Olfm1-201 | 1.661563667 | 26.51912767 | -4.035675103 | 0.042352068 | down |
| 405 | Inpp4a-201 | 0.899447667 | 15.78162567 | -4.199818228 | 0.04290887 | down |
| 406 | Tmem163-205 | 0.160894333 | 3.435077 | -4.451357805 | 0.019550575 | down |
| 407 | Mark2-221 | 0.155947333 | 3.417463333 | -4.494682089 | 0.046878472 | down |
| 408 | Ptprk-201 | 0.022847 | 0.775629667 | -5.127868445 | 0.041140562 | down |
| 409 | Add2-208 | 0.060379 | 2.29721 | -5.316690831 | 0.044775275 | down |
| 410 | Ramac-202 | 0.254896333 | 15.62569133 | -5.976292957 | 0.044325363 | down |
| 411 | Fgfr2-211 | 0.015307667 | 1.012324 | -6.108259344 | 0.045348902 | down |
| 412 | Nol4-202 | 0.006064333 | 0.510911667 | -6.430105155 | 0.016040987 | down |
| 413 | Pclo-202 | 0.026244667 | 2.220224333 | -6.456777113 | 0.041874302 | down |
| 414 | Cacna1d-201 | 0.00066 | 0.057930333 | -6.458012521 | 0.045348902 | down |
| 415 | Fbxw7-203 | 0.052282 | 6.539124 | -6.973521894 | 0.03436466 | down |
| 416 | Peg10-202 | 0.016808333 | 2.323534667 | -7.044039776 | 0.035493876 | down |
| 417 | Oxr1-209 | 0.078995333 | 10.95343733 | -7.11704354 | 0.041285741 | down |
| 418 | Dock7-205 | 0.005194333 | 0.759643333 | -7.219372427 | 0.045123884 | down |
| 419 | Zfp518b-203 | 0.003225 | 0.559104333 | -7.266293414 | 0.043536624 | down |
| 420 | Frmpd1-202 | 0.010981667 | 2.143761 | -7.618468124 | 0.007076389 | down |
| 421 | Vamp4-207 | 0.028879 | 6.738788667 | -7.851605127 | 0.032616377 | down |
| 422 | Map3k1-204 | 0.000689 | 0.212074667 | -8.146223573 | 0.030789492 | down |
| 423 | Snx25-207 | 0.006754 | 2.037835 | -8.283721553 | 0.038326682 | down |
| 424 | Trim2-205 | 0.022459667 | 7.602209667 | -8.453607578 | 0.022841535 | down |
| 425 | Dpf3-204 | 0.004019667 | 1.461298667 | -8.48755326 | 0.003520019 | down |
| 426 | C1qtnf6-205 | 0 | 0.184203 | -8.530397188 | 0.045348902 | down |
| 427 | Trmt2b-203 | 0.002114 | 0.776071 | -8.539484251 | 0.037462806 | down |
| 428 | Rap1gap2-206 | 0.001117333 | 0.606720667 | -8.99366729 | 0.018060839 | down |
| 429 | Xlr3c-201 | 0 | 0.101922333 | -9.08988022 | 0.029221394 | down |
| 430 | Cfap45-201 | 0 | 0.045628667 | -9.127424455 | 0.02912956 | down |
| 431 | Cxcr6-202 | 0 | 0.219083333 | -9.167327358 | 0.023573374 | down |
| 432 | Kcnc2-202 | 0 | 0.009361 | -9.456546745 | 0.019022833 | down |
| 433 | Fgfr2-206 | 1.10E-05 | 0.127367 | -9.474261833 | 0.037755812 | down |
| 434 | Galnt16-204 | 0 | 0.023413 | -9.918125581 | 0.010858539 | down |
| 435 | Zbtb25-201 | 0 | 0.106557333 | -10.0945317 | 0.011623896 | down |
| 436 | Disp2-202 | 0 | 0.073126 | -10.1335824 | 0.010316175 | down |
| 437 | Minar2-203 | 0 | 0.183212 | -10.21209293 | 0.015577432 | down |
| 438 | Cr1l-207 | 0 | 0.184324 | -10.30228641 | 0.006017201 | down |
| 439 | Hsd17b2-201 | 0 | 0.051862 | -10.50373402 | 0.006017201 | down |
| 440 | Kcnma1-202 | 0 | 0.006715333 | -10.7053677 | 0.003521228 | down |
| 441 | Mbtd1-203 | 0 | 0.101725333 | -10.81242404 | 0.003387908 | down |
| 442 | Mthfd1l-203 | 0 | 0.019412333 | -10.86231702 | 0.002894984 | down |
| 443 | Stub1-204 | 0 | 1.696129333 | -10.92547933 | 0.002834263 | down |
| 444 | Fbxl13-201 | 0 | 0.025126 | -10.97768095 | 0.005652636 | down |
| 445 | AL731706.1-201 | 0.000366333 | 3.495089667 | -10.999834 | 0.03918094 | down |
| 446 | 4430402I18Rik-206 | 0 | 0.106237667 | -11.05611791 | 0.049633082 | down |
| 447 | Atp6v1e1-206 | 0 | 0.238020667 | -11.11918545 | 0.047836386 | down |
| 448 | Zfp532-212 | 0 | 0.105674 | -11.12010395 | 0.049316431 | down |
| 449 | Eef2k-209 | 0 | 0.292337 | -11.12043418 | 0.049101377 | down |
| 450 | Ccl25-206 | 0 | 0.161928667 | -11.14849519 | 0.049316431 | down |
| 451 | Zfp185-201 | 0 | 0.106483333 | -11.18059395 | 0.048281372 | down |
| 452 | Mtpap-205 | 0 | 0.340401667 | -11.23488031 | 0.047758838 | down |
| 453 | Mast4-213 | 0 | 0.023980667 | -11.26144702 | 0.049316431 | down |
| 454 | Camk1d-202 | 0 | 0.013030333 | -11.26816916 | 0.044960833 | down |
| 455 | Mapk8-202 | 0 | 0.176562667 | -11.27461404 | 0.044775275 | down |
| 456 | Hsdl1-202 | 0 | 0.559983667 | -11.27769423 | 0.048802262 | down |
| 457 | Ccl25-205 | 0 | 0.150299 | -11.30994348 | 0.002108089 | down |
| 458 | Eva1a-204 | 0 | 0.106981667 | -11.35961459 | 0.045348902 | down |
| 459 | Klhdc10-203 | 0 | 0.172996 | -11.36575734 | 0.041757619 | down |
| 460 | Musk-202 | 0 | 0.061140333 | -11.40473918 | 0.041285741 | down |
| 461 | Csnk2a2-210 | 0 | 0.167398 | -11.44276736 | 0.042443599 | down |
| 462 | Odf2-208 | 0 | 0.173226667 | -11.45344484 | 0.001350614 | down |
| 463 | Inpp4a-207 | 0 | 0.052201333 | -11.4726428 | 0.040575348 | down |
| 464 | Tmem184b-208 | 0 | 0.144123667 | -11.47439023 | 0.040575348 | down |
| 465 | E130114P18Rik-201 | 0 | 0.357405 | -11.51247151 | 0.044960833 | down |
| 466 | Musk-208 | 0 | 0.067523333 | -11.52688335 | 0.001381341 | down |
| 467 | Zbtb25-206 | 0 | 0.314384667 | -11.53443046 | 0.00252842 | down |
| 468 | Agbl5-202 | 0 | 0.342591667 | -11.56846199 | 0.039080093 | down |
| 469 | Srcin1-204 | 0 | 0.162338333 | -11.63164469 | 0.048735444 | down |
| 470 | Aoah-202 | 0 | 0.111749333 | -11.66247998 | 0.038371265 | down |
| 471 | Spef2-204 | 0 | 0.038994667 | -11.6650502 | 0.038371265 | down |
| 472 | Myo16-205 | 0 | 0.056285 | -11.71206325 | 0.041757619 | down |
| 473 | Nckap5l-204 | 0 | 0.241878667 | -11.72793627 | 0.00106335 | down |
| 474 | Dnajc5b-204 | 0 | 0.085452 | -11.73753349 | 0.035782945 | down |
| 475 | Esrrb-202 | 0 | 0.073053667 | -11.73810066 | 0.046014207 | down |
| 476 | Prdx1-205 | 0 | 0.865964333 | -11.77908139 | 0.000989985 | down |
| 477 | Serpinb6c-202 | 0 | 0.274553667 | -11.78704424 | 0.001127691 | down |
| 478 | Nxf1-208 | 0 | 3.195389 | -11.79209022 | 0.034843775 | down |
| 479 | Mybl1-202 | 0 | 0.25263 | -11.89531724 | 0.000847742 | down |
| 480 | Gm28051-201 | 0 | 0.209958 | -11.90817017 | 0.034476278 | down |
| 481 | Tmem8b-209 | 0 | 0.371001667 | -12.05983591 | 0.033007819 | down |
| 482 | Phf7-206 | 0 | 0.657931 | -12.07523319 | 0.000999774 | down |
| 483 | Shank3-209 | 0 | 0.254637667 | -12.08263786 | 0.03113041 | down |
| 484 | Acer2-202 | 0 | 0.204483667 | -12.21813401 | 0.027983238 | down |
| 485 | Usp21-201 | 0 | 1.672872 | -12.27964961 | 0.013902058 | down |
| 486 | 3110009E18Rik-202 | 0 | 0.148841667 | -12.29085004 | 0.030892877 | down |
| 487 | Mapkapk5-203 | 0 | 0.506097667 | -12.31108127 | 0.028896563 | down |
| 488 | Mapkapk5-205 | 0 | 0.522573667 | -12.35757018 | 0.028453543 | down |
| 489 | Adam5-204 | 0 | 0.120081667 | -12.37522559 | 0.030789492 | down |
| 490 | Ahcyl2-213 | 0 | 0.133355 | -12.41598301 | 0.025072039 | down |
| 491 | Ddr1-203 | 0 | 0.472465333 | -12.4177912 | 0.017594812 | down |
| 492 | Paip2-202 | 0 | 0.648042667 | -12.42405216 | 0.000369464 | down |
| 493 | Inpp4a-205 | 0 | 0.104309667 | -12.46495707 | 0.024291443 | down |
| 494 | Ezh2-201 | 0 | 0.177072667 | -12.49088391 | 0.025100804 | down |
| 495 | Pwwp3b-203 | 0 | 0.419835667 | -12.52447437 | 0.00031198 | down |
| 496 | Il15ra-217 | 0 | 0.441628333 | -12.62496202 | 0.021620494 | down |
| 497 | Crb1-202 | 0 | 0.099305 | -12.63148714 | 0.022943998 | down |
| 498 | Trappc6b-203 | 0 | 0.777145 | -12.71346612 | 0.026989064 | down |
| 499 | Pou2f1-212 | 0 | 0.193184667 | -12.71568753 | 0.000384329 | down |
| 500 | Adgrl2-213 | 0 | 0.098540333 | -12.73173986 | 0.019982602 | down |
| 501 | Nbr1-204 | 0 | 0.477508 | -12.74063394 | 0.020862641 | down |
| 502 | Il1rapl1-202 | 0 | 0.010774333 | -12.76832789 | 0.023659612 | down |
| 503 | Esd-202 | 0 | 1.063383333 | -12.78314659 | 0.019022833 | down |
| 504 | Prkar1b-209 | 0 | 0.656436333 | -12.80486635 | 0.020480444 | down |
| 505 | Eps8l1-204 | 0 | 0.948121333 | -12.85441391 | 0.000368618 | down |
| 506 | Naa50-202 | 0 | 0.727032 | -12.87974343 | 0.000244323 | down |
| 507 | Dnajc12-202 | 0 | 0.592313667 | -12.88034036 | 0.018913276 | down |
| 508 | Rps6ka3-207 | 0 | 0.250015 | -13.14713744 | 0.015035067 | down |
| 509 | Plch1-208 | 0 | 0.122851667 | -13.17533884 | 0.014978323 | down |
| 510 | Prpf8-202 | 0.000157333 | 7.112386667 | -13.1931723 | 0.037462806 | down |
| 511 | Bmpr1b-203 | 0 | 0.059567667 | -13.19592869 | 0.022497439 | down |
| 512 | Rps14-204 | 0 | 7.286701 | -13.19719226 | 0.014772333 | down |
| 513 | Zfp407-201 | 0 | 0.045059 | -13.21311535 | 0.014939793 | down |
| 514 | Tbl1xr1-204 | 0 | 0.172486 | -13.23683161 | 0.01470881 | down |
| 515 | Smim8-202 | 0 | 2.034186 | -13.26273188 | 0.000156833 | down |
| 516 | Adgrg2-209 | 0 | 0.276981667 | -13.39365778 | 0.01281961 | down |
| 517 | Mrtfb-202 | 0 | 0.322257 | -13.40092934 | 0.013494362 | down |
| 518 | Kctd15-201 | 0 | 1.381045333 | -13.40846892 | 0.038281396 | down |
| 519 | Dpy30-205 | 0 | 1.414039 | -13.54994931 | 0.010760444 | down |
| 520 | Neurl1a-203 | 0 | 0.399322 | -13.60472086 | 0.010315118 | down |
| 521 | Usf3-204 | 0 | 0.484136333 | -13.66231726 | 1.50E-05 | down |
| 522 | Acap3-201 | 0 | 1.753815 | -13.70434876 | 0.010490198 | down |
| 523 | Nr6a1-210 | 0 | 0.499899333 | -13.854185 | 0.008822454 | down |
| 524 | Myo18a-210 | 0 | 0.479443667 | -13.85998552 | 0.008478765 | down |
| 525 | Mgat4c-215 | 0 | 0.042122 | -13.86804009 | 0.011015489 | down |
| 526 | Pear1-216 | 0 | 1.698986667 | -13.98440914 | 0.007449581 | down |
| 527 | Efr3b-203 | 0 | 1.097866333 | -13.99240334 | 0.007391797 | down |
| 528 | Nup62-205 | 0 | 2.367197333 | -14.02201618 | 0.026646549 | down |
| 529 | Arhgef9-204 | 0 | 0.292194 | -14.03943086 | 0.006900696 | down |
| 530 | Adgrg2-206 | 0 | 0.345411 | -14.15743053 | 0.006668056 | down |
| 531 | Cybc1-202 | 0 | 5.649476333 | -14.17884255 | 0.006162703 | down |
| 532 | Ccdc85a-205 | 0 | 0.212013667 | -14.26278366 | 1.72E-06 | down |
| 533 | Senp6-209 | 0 | 1.338830667 | -14.26818928 | 2.10E-06 | down |
| 534 | Vps11-201 | 0 | 3.052322 | -14.34952404 | 0.005394079 | down |
| 535 | Pcdh15-204 | 0 | 0.056109667 | -14.44268466 | 0.004981629 | down |
| 536 | Anxa4-208 | 0 | 1.041097 | -14.63126451 | 0.004371938 | down |
| 537 | Asxl1-201 | 2.23E-05 | 3.289048 | -14.71096087 | 1.34E-07 | down |
| 538 | Tmem104-202 | 0 | 0.927384667 | -14.73787782 | 2.75E-06 | down |
| 539 | Ddc-210 | 0 | 0.723147333 | -14.86967537 | 8.98E-08 | down |
| 540 | Btbd9-221 | 0 | 0.208741 | -14.94199062 | 6.42E-08 | down |
| 541 | Sgce-207 | 0 | 0.88536 | -14.97542558 | 0.049404538 | down |
| 542 | Ophn1-202 | 0 | 0.200340667 | -14.98487105 | 0.002765755 | down |
| 543 | Phc3-202 | 0 | 1.075400333 | -14.99829593 | 0.002786147 | down |
| 544 | Rpap2-205 | 0 | 1.464818 | -15.01008511 | 1.53E-06 | down |
| 545 | Wnk2-202 | 0 | 0.599596667 | -15.03903444 | 0.049404538 | down |
| 546 | Slco5a1-206 | 0 | 0.603443667 | -15.04201129 | 0.049404324 | down |
| 547 | Ptprd-203 | 0 | 0.199853667 | -15.16614809 | 0.00261322 | down |
| 548 | Ube2k-206 | 0 | 1.370303 | -15.2223935 | 0.046678057 | down |
| 549 | Rabep1-202 | 0 | 0.812071 | -15.24239247 | 0.044775275 | down |
| 550 | Irf2-202 | 0 | 0.806002333 | -15.27653458 | 0.003568535 | down |
| 551 | Bicdl1-205 | 0 | 1.351214333 | -15.33617209 | 0.002327568 | down |
| 552 | Cgnl1-202 | 0 | 0.589743333 | -15.38679312 | 0.001835648 | down |
| 553 | Inpp4b-212 | 0 | 0.120081 | -15.45233954 | 0.042465416 | down |
| 554 | Tubgcp5-205 | 0 | 2.409218 | -15.45308388 | 0.040959464 | down |
| 555 | Dhx30-202 | 0 | 2.759564 | -15.48175254 | 0.001500202 | down |
| 556 | L3mbtl4-202 | 0 | 0.271146 | -15.53817166 | 0.040971497 | down |
| 557 | Ddr1-212 | 0 | 4.941449 | -15.56397719 | 0.00261322 | down |
| 558 | Greb1-201 | 0 | 1.146088333 | -15.60218217 | 0.001338796 | down |
| 559 | Rspry1-207 | 0 | 1.804773333 | -15.66970287 | 0.037755812 | down |
| 560 | Etfdh-202 | 0 | 4.420456 | -15.75129408 | 0.00113019 | down |
| 561 | Dnm3-202 | 0.000415333 | 23.67684133 | -15.75604525 | 2.33E-05 | down |
| 562 | Rgs6-206 | 0 | 0.210525 | -15.79521897 | 0.036089638 | down |
| 563 | Ncmap-204 | 0 | 4.384850333 | -15.93631993 | 0.034836386 | down |
| 564 | Gpr161-202 | 0 | 4.832388667 | -15.93883337 | 8.67E-09 | down |
| 565 | Ube2k-210 | 0 | 2.124081667 | -16.00176221 | 0.001000536 | down |
| 566 | Psd3-204 | 0 | 0.474845667 | -16.02045682 | 0.035176349 | down |
| 567 | Gpc5-202 | 0 | 0.407471 | -16.02472677 | 0.035176349 | down |
| 568 | Ccdc148-204 | 0 | 0.410307667 | -16.06626956 | 2.58E-07 | down |
| 569 | Grb2-204 | 0 | 2.662637 | -16.09942646 | 0.034910757 | down |
| 570 | Cadps2-205 | 0 | 0.257819333 | -16.13883989 | 0.001019146 | down |
| 571 | Ptprd-213 | 0 | 0.233552 | -16.14333849 | 0.034584229 | down |
| 572 | Ctsd-201 | 0 | 12.435992 | -16.18743486 | 0.034026092 | down |
| 573 | Btrc-202 | 0 | 0.957236667 | -16.2055968 | 0.034285427 | down |
| 574 | Myo18a-211 | 0 | 1.786020333 | -16.24088639 | 0.001119438 | down |
| 575 | Nnt-206 | 0 | 2.598906333 | -16.47443367 | 0.032300132 | down |
| 576 | Ttc9-202 | 0 | 5.391386667 | -16.51123817 | 0.031928679 | down |
| 577 | Pard3b-201 | 0 | 0.19272 | -16.55360947 | 0.030230836 | down |
| 578 | Frmpd4-206 | 0 | 0.269104333 | -16.93246217 | 0.02912956 | down |
| 579 | U2surp-202 | 0 | 4.641346333 | -16.93660195 | 0.000551793 | down |
| 580 | Sorbs1-202 | 0 | 2.455283667 | -16.93863701 | 0.02912956 | down |
| 581 | 0610010F05Rik-202 | 0 | 6.228778 | -17.39482747 | 0.000452371 | down |
| 582 | Itsn1-205 | 0 | 2.514667667 | -17.41031935 | 0.000402788 | down |
| 583 | Mlip-212 | 0 | 1.458819667 | -17.4269854 | 0.000416848 | down |
| 584 | Tenm1-202 | 0 | 0.568027667 | -17.47097567 | 0.024113933 | down |
| 585 | Rapgef4-201 | 0 | 1.867052667 | -17.51953856 | 1.96E-13 | down |
| 586 | Ryr3-201 | 0 | 0.668801333 | -17.57877347 | 0.023573374 | down |
| 587 | 9330182L06Rik-202 | 0 | 2.592988333 | -18.05735833 | 0.000278363 | down |
| 588 | Cnot2-213 | 0 | 6.623780333 | -18.25214058 | 1.37E-15 | down |
| 589 | Ano10-203 | 0 | 5.279709667 | -18.25813838 | 0.000251528 | down |
| 590 | Cbfb-203 | 0 | 13.89073 | -18.32305918 | 0.000282014 | down |
| 591 | Magi1-201 | 0 | 1.119805 | -18.38405814 | 0.020701725 | down |
| 592 | Myo18a-203 | 0 | 8.068155667 | -18.38437258 | 0.000612536 | down |
| 593 | Cpne4-202 | 0 | 2.044563333 | -18.83375276 | 0.000202486 | down |
| 594 | Cadps2-201 | 0 | 2.462155333 | -19.36919312 | 0.008639831 | down |
| 595 | Rbms3-210 | 0 | 12.87000667 | -20.55599997 | 7.32E-05 | down |

**Supplementary Table 7 The detailed information of the DE genes encoding proteins in the TG of CCI-ION mice**

| **No.** | **Gene_name** | **D7CCI_FPKM** | **S_FPKM** | │log2FC│≥1 | **Adjusted *P* value** | **up-down** |
| --- | --- | --- | --- | --- | --- | --- |
| 1 | Gm20431 | 9.002690667 | 0 | 17.81363256 | 0.003104439 | up |
| 2 | Ear1 | 2.747253 | 0 | 16.14324519 | 8.90E-18 | up |
| 3 | Gm14434 | 7.340087333 | 0 | 14.56185303 | 4.89E-49 | up |
| 4 | Serpina1b | 0.479525 | 0 | 13.72107224 | 0.000187026 | up |
| 5 | Gm14308 | 2.517432333 | 0 | 13.54249338 | 2.17E-13 | up |
| 6 | Ugt1a8 | 0.183537 | 0 | 13.50429256 | 2.12E-05 | up |
| 7 | Matn3 | 0.866519 | 0 | 13.27613808 | 0.000189557 | up |
| 8 | Dntt | 0.533202 | 0 | 12.67023387 | 0.001392251 | up |
| 9 | Clec3a | 1.678017 | 0 | 12.59536215 | 0.00035282 | up |
| 10 | Cga | 0.919554333 | 0 | 12.10118651 | 0.000766469 | up |
| 11 | Gm281 | 0.070470333 | 0 | 11.7119777 | 0.000672688 | up |
| 12 | 1700028P14Rik | 0.065959667 | 0 | 11.53465837 | 0.001011444 | up |
| 13 | Serpina1d | 0.611767 | 0 | 11.50635221 | 0.00547229 | up |
| 14 | Mybphl | 0.384198333 | 0 | 11.43441926 | 0.006059737 | up |
| 15 | Gm9733 | 0.152108 | 0 | 11.33841561 | 0.002918161 | up |
| 16 | Trim54 | 0.222086 | 0 | 11.10718551 | 0.004610427 | up |
| 17 | Cpvl | 0.046253667 | 0 | 11.02931067 | 0.00187073 | up |
| 18 | Prg3 | 0.770196667 | 0 | 10.93316114 | 0.00021777 | up |
| 19 | Serpina1a | 0.543652667 | 0 | 10.88876395 | 0.047743504 | up |
| 20 | Sult1c1 | 0.132574 | 0 | 10.8462487 | 0.007236997 | up |
| 21 | Cd5l | 0.292227 | 0 | 10.84106455 | 0.004850416 | up |
| 22 | Gm12695 | 0.057213667 | 0 | 10.71936062 | 4.61E-06 | up |
| 23 | Ambn | 0.282713667 | 0 | 10.66264658 | 0.001041519 | up |
| 24 | Tnni3k | 0.012056667 | 0 | 10.51122732 | 0.006431223 | up |
| 25 | Scnn1b | 0.058875333 | 0 | 10.50087435 | 6.81E-07 | up |
| 26 | Raet1e | 0.076707667 | 0 | 10.50026099 | 7.65E-07 | up |
| 27 | 9830107B12Rik | 0.168835 | 0 | 10.44111259 | 0.006621746 | up |
| 28 | Gm5152 | 0.678696333 | 0 | 10.19609187 | 5.31E-06 | up |
| 29 | Dthd1 | 0.029119667 | 0 | 10.05921571 | 0.00994305 | up |
| 30 | Rnf212 | 0.08467 | 0 | 10.00150338 | 0.014090729 | up |
| 31 | Itln1 | 0.122364 | 0 | 9.975350497 | 0.020572444 | up |
| 32 | Stfa2l1 | 0.410322 | 0 | 9.974926187 | 0.020428112 | up |
| 33 | Fcna | 0.583955333 | 0 | 9.879741774 | 0.000407479 | up |
| 34 | Lrr1 | 0.239380333 | 0 | 9.830912881 | 0.001082774 | up |
| 35 | Lhx2 | 0.408121333 | 0 | 9.805445434 | 0.035598308 | up |
| 36 | Gucy1b2 | 0.027416333 | 0 | 9.715344006 | 0.000322367 | up |
| 37 | Mageb18 | 0.003600333 | 0 | 9.638505418 | 0.017047835 | up |
| 38 | Impg1 | 0.011743 | 0 | 9.63342313 | 0.017373411 | up |
| 39 | Ccnb3 | 0.02456 | 0 | 9.505216209 | 0.019858979 | up |
| 40 | Gm7298 | 0.024656 | 0 | 9.380485143 | 0.000909709 | up |
| 41 | Gphb5 | 0.272028 | 0 | 9.37524065 | 0.000207554 | up |
| 42 | Bex6 | 0.211377667 | 0 | 9.373442584 | 0.00994305 | up |
| 43 | Cd207 | 0.203820667 | 0 | 9.35599159 | 0.000232207 | up |
| 44 | Npsr1 | 0.010938333 | 0 | 9.263019697 | 0.029490624 | up |
| 45 | Fam83b | 0.015963667 | 0 | 9.220357358 | 0.000502443 | up |
| 46 | Ankrd1 | 0.210318667 | 0 | 9.166409515 | 0.002192569 | up |
| 47 | Reg1 | 0.197023333 | 0 | 9.146305279 | 0.029936009 | up |
| 48 | Gm4788 | 0.013861333 | 0 | 9.126391895 | 0.030965273 | up |
| 49 | Gm16223 | 0.007405667 | 0 | 9.069962106 | 0.031847455 | up |
| 50 | Abcb5 | 0.012952 | 0 | 9.066703936 | 0.0321496 | up |
| 51 | Tac2 | 0.299638 | 0 | 9.028950031 | 0.001046173 | up |
| 52 | Hephl1 | 0.017574667 | 0 | 8.99042078 | 0.038535622 | up |
| 53 | Prok2 | 0.091890333 | 0 | 8.825572989 | 0.004858441 | up |
| 54 | Mbl1 | 0.123173667 | 0 | 8.726391775 | 0.002243523 | up |
| 55 | Orm1 | 0.234813333 | 0 | 8.678437765 | 0.006315265 | up |
| 56 | Tmem247 | 0.176231333 | 0 | 8.287938123 | 0.009649803 | up |
| 57 | Ms4a8a | 0.074224 | 0 | 8.261967383 | 0.009713829 | up |
| 58 | Actc1 | 4.920635333 | 0.015656 | 8.162389361 | 0.005302289 | up |
| 59 | Eppin | 0.1113 | 0 | 8.149973911 | 0.009691112 | up |
| 60 | Serpina9 | 0.030422667 | 0 | 8.107678285 | 0.009201928 | up |
| 61 | Anxa10 | 1.509537333 | 0.005296 | 8.050195736 | 7.17E-07 | up |
| 62 | Prg2 | 15.63155167 | 0.056916333 | 8.038717762 | 4.74E-05 | up |
| 63 | Vmn2r5 | 0.023656 | 0 | 7.951396008 | 0.01297506 | up |
| 64 | Krt7 | 0.093847 | 0 | 7.936488997 | 0.027133719 | up |
| 65 | Ripply1 | 0.180591333 | 0 | 7.936107621 | 0.014556727 | up |
| 66 | Klra8 | 0.0339 | 0 | 7.926755929 | 0.017146954 | up |
| 67 | Gm21083 | 0.098040667 | 0 | 7.828238065 | 0.01536661 | up |
| 68 | Fabp12 | 0.009038333 | 0 | 7.815673051 | 0.024964065 | up |
| 69 | Il24 | 0.099935 | 0 | 7.802176512 | 0.032142204 | up |
| 70 | Mcoln3 | 0.039629333 | 0 | 7.796772882 | 0.01491026 | up |
| 71 | Cma2 | 0.040194667 | 0 | 7.659187874 | 0.021035144 | up |
| 72 | Inava | 0.055894667 | 0 | 7.65257519 | 0.035735253 | up |
| 73 | Tceal7 | 0.072712 | 0 | 7.603579556 | 0.035199077 | up |
| 74 | Gm9758 | 0.125578333 | 0 | 7.509424955 | 0.04033039 | up |
| 75 | Krt17 | 0.073585333 | 0 | 7.470057159 | 0.0321496 | up |
| 76 | Hamp | 0.209664667 | 0 | 7.435574772 | 0.030171411 | up |
| 77 | Gm21698 | 0.049416667 | 0 | 7.329608433 | 0.03543746 | up |
| 78 | Aqp2 | 0.058891333 | 0 | 7.31256176 | 0.035598308 | up |
| 79 | Krt73 | 0.035188 | 0 | 7.302071749 | 0.036960636 | up |
| 80 | Eif4e1b | 0.077005667 | 0 | 7.15300793 | 0.043742083 | up |
| 81 | Prss34 | 1.413717667 | 0.008544333 | 7.059620724 | 0.007389808 | up |
| 82 | Sprr1a | 28.55701333 | 0.234930333 | 6.868381327 | 8.32E-29 | up |
| 83 | Cxcr2 | 1.843957 | 0.016015333 | 6.723581769 | 0.001011444 | up |
| 84 | Fcnb | 2.268365667 | 0.019710333 | 6.68140704 | 0.031306689 | up |
| 85 | Vip | 7.343070333 | 0.072218 | 6.556788083 | 3.66E-05 | up |
| 86 | Ctsg | 2.543505 | 0.025074667 | 6.533521575 | 0.032598219 | up |
| 87 | Muc5ac | 0.725660667 | 0.007239333 | 6.516743382 | 0.003899516 | up |
| 88 | Elane | 11.11945967 | 0.128411333 | 6.404309671 | 0.007075429 | up |
| 89 | Kcnk16 | 0.514281667 | 0.005421 | 6.286690839 | 0.001337695 | up |
| 90 | Cfd | 1.124388667 | 0.013625333 | 6.188679861 | 0.023397721 | up |
| 91 | Npy | 10.59518733 | 0.150597 | 6.100741385 | 4.01E-05 | up |
| 92 | Cd177 | 4.833996333 | 0.068576 | 6.014860827 | 8.30E-06 | up |
| 93 | Gata1 | 0.840636667 | 0.026197333 | 5.964925989 | 0.042072552 | up |
| 94 | Mettl7a2 | 0.820755333 | 0.012576333 | 5.857561801 | 0.022333978 | up |
| 95 | Epx | 1.803504 | 0.029840667 | 5.819758425 | 0.001118773 | up |
| 96 | Slc6a4 | 6.551729667 | 0.113573 | 5.807155507 | 7.31E-36 | up |
| 97 | Slfn4 | 8.112909333 | 0.132817333 | 5.78409504 | 6.77E-06 | up |
| 98 | Reg3g | 8.880121 | 0.097123 | 5.700352708 | 0.001468078 | up |
| 99 | Ngp | 34.94429733 | 0.696236 | 5.612785361 | 0.000213072 | up |
| 100 | Igfn1 | 0.401674 | 0.007204 | 5.579727207 | 0.000214186 | up |
| 101 | Wfdc21 | 2.646565333 | 0.053622333 | 5.576867253 | 0.009205943 | up |
| 102 | Lipn | 2.310328333 | 0.038589 | 5.570050721 | 1.82E-12 | up |
| 103 | Camp | 26.81084933 | 0.563669 | 5.526410814 | 0.000145152 | up |
| 104 | Wdr63 | 0.172541667 | 0.003630667 | 5.510145977 | 0.015137308 | up |
| 105 | S100a9 | 147.756986 | 3.316945333 | 5.44685972 | 0.000929366 | up |
| 106 | Alox15 | 0.662135333 | 0.013756 | 5.43846616 | 0.026882472 | up |
| 107 | Chil3 | 23.04861667 | 0.571348 | 5.434154908 | 4.24E-05 | up |
| 108 | Mpo | 11.15276533 | 0.300793 | 5.428941407 | 0.002763899 | up |
| 109 | Kif28 | 0.144824333 | 0.003183 | 5.408388644 | 0.046381587 | up |
| 110 | Kcnj5 | 0.247223667 | 0.004637 | 5.345790078 | 0.010730942 | up |
| 111 | Ecel1 | 4.451979667 | 0.138363667 | 5.332427072 | 5.46E-16 | up |
| 112 | S100a8 | 186.6852917 | 4.575884 | 5.308102934 | 7.01E-05 | up |
| 113 | Col9a1 | 3.243363667 | 0.094419667 | 5.218646831 | 0.000291892 | up |
| 114 | Retnlg | 19.18814733 | 0.510256667 | 5.181406826 | 0.000318524 | up |
| 115 | Btnl10 | 0.798898333 | 0.020612333 | 5.133508202 | 0.015233287 | up |
| 116 | Lcn2 | 24.71783567 | 0.645523667 | 5.121696215 | 0.000485842 | up |
| 117 | Dhrs9 | 0.645965667 | 0.017918667 | 5.119546228 | 0.009180193 | up |
| 118 | Ltf | 26.09492233 | 0.895706667 | 5.090802393 | 6.20E-05 | up |
| 119 | Rhd | 1.832514667 | 0.081351 | 5.03204609 | 0.042328055 | up |
| 120 | Grin2b | 1.575868667 | 0.078073333 | 5.006954059 | 0.009713829 | up |
| 121 | Gpr151 | 8.965540667 | 0.275622 | 4.968422756 | 2.26E-08 | up |
| 122 | Sh2d1b2 | 0.353801333 | 0.009909667 | 4.963025361 | 0.010978455 | up |
| 123 | Ctse | 4.357425667 | 0.128201667 | 4.908922773 | 0.000223608 | up |
| 124 | Mmp8 | 4.433097667 | 0.150580333 | 4.84378628 | 0.001505183 | up |
| 125 | Uox | 0.346557 | 0.011123333 | 4.788760513 | 0.014495813 | up |
| 126 | Kel | 0.98384 | 0.054989 | 4.781258142 | 0.002949479 | up |
| 127 | Myh4 | 9.310169667 | 0.326005 | 4.760768575 | 0.024537311 | up |
| 128 | Ermap | 1.577265 | 0.046656 | 4.673462574 | 0.003361387 | up |
| 129 | Slc4a1 | 8.894462333 | 0.341821333 | 4.655160196 | 0.000209477 | up |
| 130 | Ppbp | 11.30664633 | 0.447802 | 4.604705896 | 0.004520123 | up |
| 131 | Gp6 | 0.242934 | 0.009377333 | 4.603217418 | 0.010452867 | up |
| 132 | Trim10 | 1.496036 | 0.059595 | 4.577237108 | 0.00160428 | up |
| 133 | Itgb2l | 1.418435333 | 0.083938333 | 4.513772602 | 0.030703847 | up |
| 134 | Hp | 7.623244333 | 0.32878 | 4.493112241 | 0.009713829 | up |
| 135 | Hemgn | 1.949148333 | 0.088303333 | 4.423659517 | 0.021066158 | up |
| 136 | Sell | 2.254209 | 0.156559667 | 4.379098803 | 0.003494655 | up |
| 137 | Prkcg | 1.829730667 | 0.102362333 | 4.376099861 | 0.01491026 | up |
| 138 | Ostn | 1.056558667 | 0.052971667 | 4.272022937 | 0.031763284 | up |
| 139 | Stab2 | 0.530591 | 0.015893 | 4.252747453 | 0.000122691 | up |
| 140 | Gal | 74.58244467 | 3.854022667 | 4.240497941 | 3.72E-37 | up |
| 141 | Fpr1 | 1.202772333 | 0.061606333 | 4.205649153 | 0.012985412 | up |
| 142 | B430306N03Rik | 0.917796 | 0.049550333 | 4.197917734 | 0.009386236 | up |
| 143 | Clec4d | 1.012892667 | 0.050295667 | 4.18518805 | 0.03625244 | up |
| 144 | F5 | 0.952650333 | 0.053225333 | 4.125068573 | 0.001335249 | up |
| 145 | Tnfrsf8 | 0.747490333 | 0.040433333 | 4.123594309 | 1.33E-05 | up |
| 146 | Mgam | 0.239092333 | 0.014541667 | 4.080169593 | 0.017117063 | up |
| 147 | Abca13 | 0.659937333 | 0.035192333 | 4.0338385 | 0.000203515 | up |
| 148 | Hrasls5 | 0.216275 | 0.010359667 | 4.022137755 | 0.046824917 | up |
| 149 | Gfi1 | 0.449659333 | 0.018514 | 4.005325694 | 0.042121171 | up |
| 150 | Epb42 | 1.220641667 | 0.051212667 | 3.964423316 | 0.038799398 | up |
| 151 | Gypa | 2.947120333 | 0.188944333 | 3.9241093 | 0.004850416 | up |
| 152 | Prtn3 | 4.719932 | 0.366513 | 3.890124192 | 0.034720365 | up |
| 153 | Padi4 | 1.553952 | 0.088122333 | 3.886239957 | 0.016550818 | up |
| 154 | Trem3 | 1.318478667 | 0.086501 | 3.881872894 | 0.03623488 | up |
| 155 | Ifitm6 | 5.496896667 | 0.360738 | 3.879665864 | 0.04213541 | up |
| 156 | Spta1 | 0.968471667 | 0.062881667 | 3.874058675 | 0.001671805 | up |
| 157 | Grin2a | 1.156987333 | 0.060422 | 3.873937258 | 0.003960853 | up |
| 158 | Col2a1 | 33.19140833 | 2.523814667 | 3.858000245 | 0.005260749 | up |
| 159 | Pbk | 1.316144667 | 0.090325 | 3.812927476 | 0.005127829 | up |
| 160 | Acvr1c | 0.785532 | 0.044599333 | 3.812900482 | 5.15E-15 | up |
| 161 | Barx1 | 0.717119667 | 0.04586 | 3.793536112 | 0.044657275 | up |
| 162 | Myl1 | 9.81908 | 0.786147333 | 3.760663337 | 0.03465251 | up |
| 163 | Fgr | 1.425931 | 0.088482667 | 3.714407302 | 0.038275562 | up |
| 164 | Myb | 1.189429667 | 0.082149667 | 3.674947884 | 0.025995203 | up |
| 165 | Fpr2 | 2.221775333 | 0.184281667 | 3.630325931 | 0.026579871 | up |
| 166 | Hist1h3c | 33.186227 | 2.64864 | 3.600436608 | 0.004081434 | up |
| 167 | Mmrn1 | 0.922713 | 0.074604 | 3.578365829 | 0.001211485 | up |
| 168 | Plac8 | 11.468497 | 0.964359333 | 3.558473832 | 0.000784392 | up |
| 169 | Rab44 | 1.358129 | 0.091627 | 3.541717667 | 0.044518265 | up |
| 170 | Hist1h1b | 24.07644333 | 2.062111667 | 3.500000458 | 0.013543738 | up |
| 171 | Depdc1a | 0.393854667 | 0.026304 | 3.464448648 | 0.036960636 | up |
| 172 | Cckbr | 4.162370667 | 0.375395667 | 3.444141923 | 5.09E-30 | up |
| 173 | Hist1h1a | 16.23928 | 1.504011 | 3.390804311 | 0.043028318 | up |
| 174 | Hdc | 2.22228 | 0.193835 | 3.371237853 | 0.01381144 | up |
| 175 | Atf3 | 40.89078933 | 3.845446667 | 3.371098128 | 9.99E-49 | up |
| 176 | Oas3 | 3.679377 | 0.483092333 | 3.361521778 | 0.00019664 | up |
| 177 | Kif18b | 0.580442333 | 0.050899333 | 3.352889989 | 0.02329953 | up |
| 178 | Aqp9 | 0.489963 | 0.068444667 | 3.331835893 | 0.035943704 | up |
| 179 | Nrgn | 2.905664333 | 0.285849667 | 3.331029241 | 0.006565032 | up |
| 180 | Tubb1 | 2.189345 | 0.212782333 | 3.320364496 | 0.01237645 | up |
| 181 | Cd101 | 0.352327667 | 0.034778667 | 3.29949028 | 0.01942585 | up |
| 182 | Ube2c | 1.991107 | 0.161420667 | 3.269214774 | 0.046381587 | up |
| 183 | Zfp831 | 0.225559 | 0.023436667 | 3.246744091 | 0.021721796 | up |
| 184 | Mmp9 | 13.81417433 | 1.441679 | 3.221639898 | 0.01690155 | up |
| 185 | Pou2af1 | 0.392663 | 0.039787333 | 3.200987987 | 0.040946138 | up |
| 186 | Cyp26a1 | 1.188668333 | 0.157033667 | 3.192953905 | 0.046746291 | up |
| 187 | Comp | 14.98709867 | 1.641727 | 3.192450314 | 1.12E-05 | up |
| 188 | Nek10 | 0.053332 | 0.005776333 | 3.171595324 | 0.037230804 | up |
| 189 | Acan | 4.547836667 | 0.475166 | 3.168037199 | 0.002432911 | up |
| 190 | Pglyrp1 | 8.967431 | 0.980580333 | 3.165270506 | 0.01237645 | up |
| 191 | Atp8b4 | 1.636548667 | 0.17276 | 3.158806429 | 0.003325412 | up |
| 192 | Hist1h2ab | 27.307882 | 2.992074333 | 3.148067958 | 0.039784888 | up |
| 193 | Dlgap5 | 0.916185333 | 0.119357667 | 3.145339711 | 0.048110175 | up |
| 194 | Ccnb2 | 1.603929667 | 0.177567333 | 3.134115327 | 0.004081434 | up |
| 195 | Pkhd1l1 | 0.545198667 | 0.041447 | 3.132545465 | 0.01381144 | up |
| 196 | Cdcp1 | 0.524720333 | 0.046302333 | 3.078630019 | 0.007610946 | up |
| 197 | Fgf23 | 0.629237667 | 0.072000667 | 3.071128347 | 0.023904284 | up |
| 198 | Acta1 | 16.98431633 | 1.960348667 | 3.065751402 | 0.034720365 | up |
| 199 | Mki67 | 4.120900333 | 0.564257 | 3.041591982 | 0.001898835 | up |
| 200 | Adgre4 | 0.357612667 | 0.043580333 | 2.998958323 | 0.016559872 | up |
| 201 | Fer1l6 | 0.317126 | 0.040263667 | 2.971189253 | 0.000122691 | up |
| 202 | Hist1h3a | 21.53233067 | 2.695254333 | 2.959036962 | 0.046915925 | up |
| 203 | C3 | 8.71118 | 1.111370667 | 2.942895756 | 2.47E-07 | up |
| 204 | Blk | 0.232111 | 0.029159 | 2.934155064 | 0.039784888 | up |
| 205 | Rrm2 | 4.261059667 | 0.631762333 | 2.922581072 | 0.028204585 | up |
| 206 | Top2a | 7.509814 | 1.147645333 | 2.915158585 | 0.000471803 | up |
| 207 | Hist1h2bn | 36.53121633 | 4.70751 | 2.913711171 | 0.038878274 | up |
| 208 | Csf3r | 4.993177 | 0.797620333 | 2.900462762 | 0.003203097 | up |
| 209 | Slfn1 | 3.084093667 | 0.406078 | 2.892065929 | 0.027810866 | up |
| 210 | Ryr1 | 1.118543 | 0.130413333 | 2.882431372 | 0.037348792 | up |
| 211 | Hist1h3b | 29.41163867 | 3.909924 | 2.873247944 | 0.028911652 | up |
| 212 | Ano7 | 0.863868 | 0.047194333 | 2.871192243 | 0.007226307 | up |
| 213 | Uhrf1 | 2.071318667 | 0.299351 | 2.774762223 | 0.013709368 | up |
| 214 | Cenpf | 0.891124333 | 0.117054 | 2.761829921 | 0.00446205 | up |
| 215 | Shisa9 | 1.059497 | 0.190489667 | 2.714536184 | 0.001311842 | up |
| 216 | Nusap1 | 1.357488333 | 0.206585333 | 2.667989809 | 0.006621746 | up |
| 217 | Ccn5 | 1.150414333 | 0.189082 | 2.650175523 | 0.02488323 | up |
| 218 | A630023A22Rik | 0.611524667 | 0.050272667 | 2.644414539 | 0.005072038 | up |
| 219 | Myo18b | 0.197991 | 0.030172667 | 2.636190923 | 0.024964065 | up |
| 220 | Wif1 | 1.344236 | 0.200285 | 2.625022294 | 0.030171411 | up |
| 221 | Col6a6 | 0.174866333 | 0.028098667 | 2.594992472 | 0.020285219 | up |
| 222 | Actn3 | 1.73515 | 0.332902 | 2.568331961 | 0.036544044 | up |
| 223 | Tnc | 8.617519333 | 1.419907 | 2.564509021 | 0.000285092 | up |
| 224 | Hist1h2bq | 26.22644967 | 3.951269333 | 2.520977392 | 0.001335249 | up |
| 225 | Rac2 | 4.210136667 | 0.843844 | 2.503942987 | 0.029308349 | up |
| 226 | Chad | 5.23658 | 0.690823 | 2.496782466 | 0.024297929 | up |
| 227 | Spns3 | 0.374231 | 0.055533667 | 2.457425043 | 0.039673258 | up |
| 228 | Cilp2 | 1.550589 | 0.276282 | 2.447726917 | 0.034720365 | up |
| 229 | Draxin | 1.739940667 | 0.316111667 | 2.432750129 | 3.94E-07 | up |
| 230 | Anxa1 | 16.03749333 | 2.921462333 | 2.42378567 | 1.30E-06 | up |
| 231 | Dnah5 | 0.118342333 | 0.02186 | 2.413807856 | 0.001162189 | up |
| 232 | Stum | 2.157189333 | 0.303371333 | 2.398558662 | 0.024465128 | up |
| 233 | Adam8 | 7.512718333 | 1.471730333 | 2.389178654 | 1.26E-07 | up |
| 234 | Tubb6 | 19.236922 | 3.694719333 | 2.355276624 | 3.95E-17 | up |
| 235 | Actn2 | 1.317580333 | 0.294548333 | 2.35380777 | 0.008723985 | up |
| 236 | Ms4a4c | 2.582895 | 0.443653 | 2.351675431 | 0.001011444 | up |
| 237 | Slfn9 | 4.136587667 | 1.065960667 | 2.332750502 | 8.30E-06 | up |
| 238 | Nxph1 | 0.889861 | 0.170749667 | 2.316984224 | 0.000418465 | up |
| 239 | Aspm | 0.778083333 | 0.150914333 | 2.297876453 | 0.0321496 | up |
| 240 | Usf3 | 3.629360667 | 0.902993667 | 2.291852103 | 0.02929669 | up |
| 241 | Fst | 4.710122333 | 1.081414 | 2.282887485 | 0.012112593 | up |
| 242 | Mybpc2 | 1.715811 | 0.347275333 | 2.26414108 | 0.04502354 | up |
| 243 | Pax5 | 0.253269 | 0.041495667 | 2.256742672 | 0.021431616 | up |
| 244 | Prc1 | 3.161903667 | 0.811074667 | 2.253089481 | 0.020428112 | up |
| 245 | Car1 | 2.174539333 | 0.447033667 | 2.252301467 | 0.005031682 | up |
| 246 | Ipcef1 | 1.495288333 | 0.282698 | 2.228168406 | 0.002688013 | up |
| 247 | Mx1 | 3.609713667 | 0.831947667 | 2.227514223 | 0.003835109 | up |
| 248 | Cyp4b1 | 1.547762 | 0.315316667 | 2.226673241 | 0.002499689 | up |
| 249 | Liph | 0.513943333 | 0.111488 | 2.211940244 | 0.044424254 | up |
| 250 | Lgals3 | 10.19660933 | 2.099819 | 2.207636689 | 0.001109629 | up |
| 251 | Selplg | 3.601253333 | 0.961954 | 2.185558081 | 0.01965402 | up |
| 252 | Bin2 | 2.205725667 | 0.462932667 | 2.182283053 | 0.027350641 | up |
| 253 | Col1a1 | 497.8160807 | 108.0733513 | 2.174764851 | 0.010017384 | up |
| 254 | Col9a3 | 4.388271667 | 1.946189 | 2.164448885 | 0.02322155 | up |
| 255 | Glipr1 | 1.325207333 | 0.346248667 | 2.157374106 | 0.045770571 | up |
| 256 | Kif4 | 0.584028 | 0.127843 | 2.155306007 | 0.022686189 | up |
| 257 | Hba-a1 | 494.4266153 | 109.4925103 | 2.152227975 | 2.24E-09 | up |
| 258 | Hbb-bt | 385.276825 | 85.63577 | 2.145948342 | 1.35E-09 | up |
| 259 | Itgb2 | 4.866204667 | 1.052765667 | 2.119600603 | 0.002499689 | up |
| 260 | Pcdhgb4 | 8.634072 | 2.113922 | 2.116026623 | 0.005768302 | up |
| 261 | Knl1 | 0.809618 | 0.176205667 | 2.108687175 | 0.023877739 | up |
| 262 | Hck | 2.933770667 | 0.661078 | 2.099015749 | 0.00056895 | up |
| 263 | Hba-a2 | 441.671112 | 104.7654977 | 2.053431077 | 6.18E-09 | up |
| 264 | Alas2 | 14.13788167 | 3.479356667 | 2.02830367 | 1.69E-07 | up |
| 265 | Clec12a | 3.230742333 | 0.801348667 | 2.02087786 | 0.022739429 | up |
| 266 | H2-T24 | 4.557117667 | 1.115686333 | 2.000384355 | 0.001046173 | up |
| 267 | Hist1h1d | 7.724655333 | 2.112653 | 2.000313211 | 0.01735935 | up |
| 268 | Cd52 | 10.28156 | 2.554301333 | 1.981497506 | 0.015712582 | up |
| 269 | Ifi204 | 5.095203667 | 1.282463667 | 1.975718992 | 0.001373469 | up |
| 270 | Nts | 22.876058 | 5.792326333 | 1.952922673 | 1.39E-07 | up |
| 271 | Syk | 4.196345667 | 0.975938 | 1.950893937 | 0.001469007 | up |
| 272 | Ifi209 | 3.275923667 | 0.858771667 | 1.947623667 | 0.016064387 | up |
| 273 | Hbb-bs | 844.5286867 | 217.6639507 | 1.931328533 | 2.05E-08 | up |
| 274 | Slfn2 | 6.778734 | 1.750891 | 1.919734548 | 0.03207832 | up |
| 275 | Ifi211 | 2.733624 | 0.719349667 | 1.902616511 | 0.005097005 | up |
| 276 | S100a11 | 42.83509067 | 11.31025033 | 1.898184815 | 3.41E-11 | up |
| 277 | Hvcn1 | 1.748103 | 0.474119667 | 1.886496179 | 0.024698699 | up |
| 278 | Glis3 | 1.623949 | 0.466193667 | 1.885295356 | 6.41E-16 | up |
| 279 | Apbb1ip | 1.899555 | 0.505214667 | 1.880523111 | 0.016659873 | up |
| 280 | Fam163a | 0.983546333 | 0.266799333 | 1.85944961 | 2.88E-07 | up |
| 281 | Mllt11 | 65.15277667 | 18.234325 | 1.849959652 | 0.002724769 | up |
| 282 | Gm28036 | 1.260266 | 0.635500333 | 1.81574189 | 0.002493632 | up |
| 283 | Sla | 2.664977333 | 0.874066667 | 1.812023097 | 0.021044503 | up |
| 284 | Aspn | 6.050463667 | 1.684185333 | 1.809411427 | 0.006621746 | up |
| 285 | Atp2a3 | 3.418385667 | 1.020108333 | 1.800850251 | 0.040217154 | up |
| 286 | Cybb | 8.999476333 | 2.531175333 | 1.763811552 | 0.003325412 | up |
| 287 | Sox11 | 8.763704667 | 2.542101667 | 1.762305758 | 9.97E-06 | up |
| 288 | Myo1f | 3.527672333 | 1.107229667 | 1.761039341 | 0.005759829 | up |
| 289 | Ms4a6d | 2.116674 | 0.630651 | 1.752014792 | 0.024003936 | up |
| 290 | Arhgdib | 14.14905733 | 3.934107333 | 1.742942836 | 0.016117577 | up |
| 291 | Trim30d | 4.957667667 | 1.503659 | 1.741173806 | 0.010022335 | up |
| 292 | Mn1 | 2.136719 | 0.779833667 | 1.728553103 | 0.000789745 | up |
| 293 | Flrt3 | 15.03507 | 4.487707667 | 1.719907243 | 6.78E-11 | up |
| 294 | Il17ra | 2.414424667 | 0.793510333 | 1.703590612 | 0.020572444 | up |
| 295 | Oas2 | 3.65309 | 1.261028667 | 1.696924145 | 0.008219863 | up |
| 296 | Sez6l | 7.439057667 | 2.265326333 | 1.690743383 | 1.88E-11 | up |
| 297 | Itga8 | 1.694672 | 0.593171 | 1.689067577 | 0.012889406 | up |
| 298 | Rsad2 | 10.629218 | 3.271435 | 1.674425306 | 0.001560473 | up |
| 299 | Car3 | 8.875072667 | 2.743673333 | 1.671568194 | 0.031633097 | up |
| 300 | Omd | 5.510919667 | 1.433925 | 1.659902037 | 0.040455404 | up |
| 301 | Eln | 4.194760667 | 1.295207667 | 1.636824349 | 0.024297929 | up |
| 302 | Ifi213 | 3.339280333 | 1.084432333 | 1.634818231 | 0.01536661 | up |
| 303 | Elf4 | 1.776097 | 0.610792667 | 1.592028184 | 0.012067982 | up |
| 304 | Prokr2 | 9.10299 | 3.155098667 | 1.586629556 | 0.000215947 | up |
| 305 | Dcun1d2 | 13.707744 | 4.951925333 | 1.577068029 | 3.19E-11 | up |
| 306 | Hist1h4m | 19.19965033 | 19.953603 | 1.570344798 | 0.02475607 | up |
| 307 | Col6a5 | 1.834898 | 0.678580667 | 1.561473782 | 0.009606621 | up |
| 308 | Trim30a | 7.786949667 | 2.605859333 | 1.55713735 | 0.001702259 | up |
| 309 | Col1a2 | 381.0182957 | 131.5655137 | 1.531874533 | 0.016550818 | up |
| 310 | Ramp1 | 1.228518 | 0.438450333 | 1.5278811 | 0.049643955 | up |
| 311 | Ccdc3 | 6.019656333 | 2.05676 | 1.520109787 | 0.000223608 | up |
| 312 | Satb2 | 2.745394667 | 0.871851333 | 1.518147062 | 0.000601182 | up |
| 313 | Fmod | 11.91805333 | 4.081331 | 1.513682531 | 0.017152544 | up |
| 314 | Loxl2 | 4.977400333 | 1.719428667 | 1.505275199 | 0.005040627 | up |
| 315 | Vav1 | 2.563680333 | 0.896977667 | 1.50255976 | 0.003325412 | up |
| 316 | Naip2 | 0.871629667 | 0.298849333 | 1.496334062 | 0.046824917 | up |
| 317 | Gcnt1 | 1.614823 | 0.507800667 | 1.494084344 | 0.026959075 | up |
| 318 | Loxl1 | 7.669193667 | 2.662147667 | 1.493133412 | 0.008046092 | up |
| 319 | Serpinb1a | 65.33450067 | 23.366961 | 1.492110726 | 2.95E-10 | up |
| 320 | Slc44a5 | 0.401816667 | 0.149218 | 1.488301811 | 0.006696185 | up |
| 321 | Cd53 | 6.281647667 | 2.196059333 | 1.486858437 | 0.001923882 | up |
| 322 | Oas1a | 5.031682333 | 1.773121 | 1.482549121 | 0.019365468 | up |
| 323 | Ptprc | 10.09278033 | 3.387135 | 1.474313753 | 0.01546649 | up |
| 324 | Pcdh15 | 1.112168333 | 0.289126 | 1.468317512 | 0.017164547 | up |
| 325 | Slfn8 | 4.590113 | 1.686741333 | 1.458620088 | 0.026579871 | up |
| 326 | Postn | 23.941936 | 8.744367333 | 1.45657484 | 0.011661481 | up |
| 327 | Ifi207 | 2.859552333 | 1.027476333 | 1.453902866 | 0.022931061 | up |
| 328 | Akr1b8 | 5.375118333 | 1.978764 | 1.416490029 | 0.000870868 | up |
| 329 | Xdh | 7.822343333 | 3.412756333 | 1.398843717 | 2.76E-05 | up |
| 330 | Ms4a6c | 6.287059333 | 2.363702333 | 1.385743251 | 0.021022662 | up |
| 331 | Serpinh1 | 28.04440567 | 10.589165 | 1.381018837 | 9.79E-05 | up |
| 332 | Col3a1 | 109.3136013 | 41.80083467 | 1.371918934 | 0.000207554 | up |
| 333 | Plbd1 | 4.786602 | 1.863159333 | 1.370752218 | 0.03465251 | up |
| 334 | Lmo7 | 9.955201 | 4.590366 | 1.358745257 | 2.16E-07 | up |
| 335 | Lox | 11.07489433 | 4.274041667 | 1.345304161 | 0.005644433 | up |
| 336 | Siglec1 | 4.312635333 | 1.706658 | 1.341544517 | 0.012059058 | up |
| 337 | Tnfrsf1b | 3.266565333 | 1.264327333 | 1.340976963 | 0.007264711 | up |
| 338 | Ifit3 | 32.938836 | 12.915286 | 1.332131323 | 0.001345155 | up |
| 339 | Pappa2 | 2.19345 | 0.97824 | 1.331749696 | 1.72E-05 | up |
| 340 | Adgrd1 | 2.983098 | 1.122961 | 1.331358227 | 0.000299651 | up |
| 341 | Vgf | 70.41474033 | 28.01311667 | 1.326720828 | 2.05E-08 | up |
| 342 | Stk17b | 5.730179 | 2.265192667 | 1.323134257 | 0.024537311 | up |
| 343 | Fcrls | 6.511087667 | 2.563804667 | 1.321232663 | 0.001378241 | up |
| 344 | Cckar | 14.84629133 | 5.975481333 | 1.312746248 | 0.048110175 | up |
| 345 | Mmp16 | 10.44876033 | 4.220783333 | 1.310904286 | 4.27E-06 | up |
| 346 | Ube2k | 13.63269467 | 7.707556667 | 1.303450721 | 3.30E-09 | up |
| 347 | Epsti1 | 1.983274 | 0.795755 | 1.299673703 | 0.031904927 | up |
| 348 | Lyz2 | 92.802114 | 36.93709467 | 1.298589761 | 0.032791125 | up |
| 349 | Polr3g | 11.955833 | 5.222968667 | 1.294524913 | 0.024027444 | up |
| 350 | Mpeg1 | 12.96296333 | 5.211080667 | 1.289727362 | 0.032748488 | up |
| 351 | Acta2 | 9.836105333 | 3.963100667 | 1.278915137 | 0.024698699 | up |
| 352 | Myh11 | 3.656024667 | 1.482147333 | 1.269641241 | 0.003448085 | up |
| 353 | Xylt1 | 1.977105667 | 0.923059 | 1.267134573 | 0.000567251 | up |
| 354 | Wdfy4 | 3.540588333 | 1.661040667 | 1.263238123 | 0.006740849 | up |
| 355 | Tent5c | 6.093461333 | 2.520125 | 1.257837792 | 0.044791992 | up |
| 356 | Fap | 7.056444 | 3.000318667 | 1.251940674 | 0.028270748 | up |
| 357 | Phf11d | 4.330554 | 1.971371667 | 1.243705915 | 0.019189189 | up |
| 358 | Sema6a | 14.82992767 | 6.508120333 | 1.240487075 | 3.23E-07 | up |
| 359 | Ifit3b | 12.561092 | 5.287354667 | 1.229834779 | 0.039784888 | up |
| 360 | Usp18 | 10.537658 | 4.397732 | 1.213180625 | 0.032142204 | up |
| 361 | Col6a3 | 18.769013 | 8.173471667 | 1.173048902 | 0.001898835 | up |
| 362 | Epha3 | 2.075533667 | 0.914944 | 1.148561357 | 0.016550818 | up |
| 363 | Add2 | 64.00787233 | 44.909247 | 1.145039344 | 0.048354624 | up |
| 364 | Mmp2 | 22.49859 | 10.28574167 | 1.139618847 | 0.004422091 | up |
| 365 | Nckap1l | 3.763 | 1.653336 | 1.129570551 | 0.0321496 | up |
| 366 | Scpep1 | 24.916056 | 11.231513 | 1.12678245 | 2.16E-07 | up |
| 367 | Gpx3 | 68.68184567 | 30.805091 | 1.120282795 | 0.017707917 | up |
| 368 | Sbno2 | 21.13340767 | 10.410516 | 1.109893713 | 7.45E-06 | up |
| 369 | Klhl1 | 0.237735 | 0.109192333 | 1.098792535 | 0.007257962 | up |
| 370 | Rftn1 | 1.66275 | 0.776733 | 1.098736707 | 0.019415074 | up |
| 371 | Pik3ap1 | 4.866864333 | 2.272078333 | 1.093269826 | 0.002327698 | up |
| 372 | Col6a1 | 22.40954 | 10.34465733 | 1.088012021 | 0.012391965 | up |
| 373 | Csf1 | 11.05441467 | 4.804301667 | 1.079472071 | 0.013301613 | up |
| 374 | Plcg2 | 2.753878667 | 1.278913333 | 1.078032002 | 0.043183953 | up |
| 375 | Spp1 | 116.5600863 | 54.43035367 | 1.069391414 | 0.000939383 | up |
| 376 | Slfn5 | 9.124694667 | 4.095634 | 1.067079474 | 0.039460646 | up |
| 377 | Itpr1 | 19.486305 | 11.605234 | 1.057235834 | 4.86E-05 | up |
| 378 | Ptpro | 4.753536667 | 2.501651667 | 1.054182671 | 2.06E-05 | up |
| 379 | Fosl2 | 6.985232 | 3.341390667 | 1.053809181 | 0.023877739 | up |
| 380 | Bloc1s6 | 8.355229333 | 3.734566 | 1.04818497 | 0.049238934 | up |
| 381 | Slc6a19 | 6.11039 | 2.981227333 | 1.041772732 | 0.007610946 | up |
| 382 | Cdhr1 | 12.10231433 | 5.800477333 | 1.03863152 | 0.000111513 | up |
| 383 | Col5a2 | 21.67740567 | 10.60133467 | 1.035815915 | 0.019270809 | up |
| 384 | Col5a1 | 17.865618 | 8.682144 | 1.018657411 | 0.002976265 | up |
| 385 | Lyn | 5.784840333 | 2.929763667 | 1.017546478 | 0.033959186 | up |
| 386 | Gap43 | 60.56753767 | 29.552176 | 1.013663991 | 5.86E-07 | up |
| 387 | Scara5 | 7.987941333 | 3.898382 | 1.010018613 | 0.031306689 | up |
| 388 | Mylk | 5.485802 | 2.711683667 | 1.008412565 | 0.042121171 | up |
| 389 | Tmem132c | 3.160593 | 6.233996333 | -1.000492256 | 0.000251411 | down |
| 390 | Rgs6 | 5.514219 | 8.362489333 | -1.00796758 | 0.0489905 | down |
| 391 | Faim2 | 8.386847333 | 16.451412 | -1.04917604 | 0.039552816 | down |
| 392 | Timm22 | 4.163210333 | 7.641947667 | -1.119195185 | 0.026579871 | down |
| 393 | Cdkl4 | 2.627803667 | 6.628341 | -1.189341012 | 8.59E-05 | down |
| 394 | Rem2 | 6.14279 | 13.86342967 | -1.193682178 | 0.036694279 | down |
| 395 | Gramd1b | 20.443935 | 38.97452667 | -1.29021928 | 0.000925577 | down |
| 396 | Mpv17l | 1.224717333 | 2.846680333 | -1.327872693 | 0.038504476 | down |
| 397 | Fbxo40 | 1.460448 | 3.261926 | -1.364962527 | 0.001271213 | down |
| 398 | Pcdha1 | 0.429254 | 1.049592 | -1.371156223 | 0.006621746 | down |
| 399 | Ccdc192 | 0.192339 | 0.508602667 | -1.385049582 | 0.031282511 | down |
| 400 | Phf24 | 61.28012333 | 117.462527 | -1.519368297 | 0.006726342 | down |
| 401 | Syt2 | 56.52674767 | 116.954427 | -1.60723308 | 8.43E-16 | down |
| 402 | 9130204L05Rik | 0.136710333 | 0.441230333 | -1.713410865 | 0.027006131 | down |
| 403 | Lrrc8d | 4.319180333 | 12.13564933 | -1.745980774 | 0.004527309 | down |
| 404 | Calb2 | 6.740461 | 34.46294767 | -2.374671376 | 2.33E-26 | down |
| 405 | Pcdhga2 | 2.726999333 | 17.89993933 | -2.740199627 | 2.67E-32 | down |
| 406 | Ugt1a6b | 0.215388667 | 1.495705 | -2.841519328 | 3.50E-12 | down |
| 407 | Gm14288 | 0.521356667 | 5.217296 | -3.135411026 | 0.019589567 | down |
| 408 | Rpl29 | 1.079571 | 12.61586367 | -4.051287619 | 0.001271213 | down |
| 409 | Col19a1 | 0.553421 | 182.937147 | -6.708942474 | 0.003153543 | down |
| 410 | Strc | 0 | 0.018427667 | -7.599720504 | 0.032714217 | down |
| 411 | Hao2 | 0 | 0.028304 | -8.042050443 | 0.011175175 | down |
| 412 | Gdpd4 | 0 | 0.007891333 | -8.96597982 | 0.037120371 | down |
| 413 | Xlr3c | 0 | 0.101922333 | -9.082767256 | 0.000943154 | down |
| 414 | Nmu | 0 | 0.039851 | -9.222377956 | 0.026579871 | down |
| 415 | Bpifb2 | 0 | 0.103444667 | -9.723848543 | 0.015233287 | down |
| 416 | Gzmk | 0 | 0.041549667 | -10.03277495 | 0.008448696 | down |
| 417 | Gm4724 | 0 | 0.408356667 | -10.72967003 | 0.047406196 | down |
| 418 | AL731706.1 | 0.000366333 | 3.495089667 | -10.95203107 | 0.002254705 | down |
| 419 | Gm20390 | 0 | 0.27652 | -11.30574987 | 0.033959186 | down |
| 420 | Gm28051 | 0 | 0.209958 | -11.90501874 | 0.000418465 | down |
| 421 | Nnt | 0 | 2.598906333 | -16.4860298 | 0.003304652 | down |

**Supplementary Table 8 The list of DE miRNAs involved with pain**

| **No.** | **DE miRNA** | **Expression** | **Target** | **Species** | **Tissue** | **Pain Model** | **Reference**  **Pubmed ID** |
| --- | --- | --- | --- | --- | --- | --- | --- |
| 1 | miR-449a-5p | down | Trpa1  Kcnma1 | mouse | DRG | SNI | 28498403 |
| 2 | miR-449a-5p | up | Pparg | rat | Spinal cord | SCI | 30119293 |
| 3 | miR-429-3p | down | Zeb1 | rat | Spinal cord  Microglia | CCI | 29150958 |
| 4 | miR-34c-5p | down | Nlrp3 | mouse | Spinal cord | CCI | 30593918 |
| 5 | miR-34c-5p | up | Sirt1 | rat | DRG | CCI | 32126145 |
| 6 | miR-34a-5p | down | Scn2b  Vamp2 | rat | DRG | CCI | 31278961 |
| 7 | miR-34a-5p | down | Xist  YY1 | human | blood | CRPS | 29773953 |
| 8 | miR-34a-5p | down | CRHR1 | human | blood | CRPS | 26940669 |
| 9 | miR-34a-5p | up | Sirt1 | mouse | Spinal cord | CFA | 31296380 |
| 10 | miR-221-3p | up | Socs1 | rat | Spinal cord  Microglia | CCI | 27059231 |
| 11 | miR-206-3p | down | Hdac4 | rat | DRG | CCI | 30587671 |
| 12 | miR-206-3p | down | Bdnf | rat | DRG | CCI | 28130187 |
| 13 | miR-200b-3p | down | Zeb1 | rat | Spinal cord  Microglia | CCI | 29150958 |
| 14 | miR-199a-3p | up | SERPINE2 | human | Plasma | Diabetes type II | 28677735 |
| 15 | miR-18a-5p | up | Kcna1  Kcnd3 | rat | DRG | SNL | 28677679 |
| 16 | miR-183-5p | down | Kcnk2 | rat | DRG | CCI | 29736614 |
| 17 | miR-183-5p | down | Scn3a  Bdnf | rat | DRG | SNL | 24612023 |
| 18 | miR-183-5p | down | Mtor | rat | Spinal cord | CCI | 28214854 |
| 19 | miR-183-5p | up | Cldn1 | rat | Sciatic nerve | Perineural injection of sciatic nerve with recombinant tissue plasminogen activator | 26735170 |
| 20 | miR-183-5p | down | Txnip | rat | Spinal cord | CCI | 32723328 |
| 21 | miR-183-5p | down | Tgfα | Human  mouse | Human knee joint fluid  DRG from mouse | osteoarthritis | 34463129 |
| 22 | miR-183-5p | down | Map3k4 | rat | DRG | CCI | 31602666 |
| 23 | miR-183-5p | down | - | rat | TG | CFA | 17559665 |
| 24 | miR-182-5p | down | Ephb1 | mouse | Spinal cord | CCI | 28248712 |
| 25 | miR-182-5p | down | Jmjd1a | rat | DRG | CCI | 34518490 |
| 26 | miR-182-5p | down | Scn9a | rat | DRG | SNI | 30425258 |
| 27 | miR-146a-5p | up | Traf6 | mouse | Spinal cord | SNL | 25957028 |
| 28 | miR-146a-5p | up | Traf6  Irak1 | rat | Spinal cord  Microglia | SNL | 32292108 |
| 29 | miR-146a-5p | down | Wnt5a | rat | Spinal cord | CCI | 34612146 |
| 30 | miR-146a-5p | down | Scn9a | rat | DRG | CFA | 30129228 |
| 31 | miR-212-3p | down | Scn3a | rat | DRG | CCI | 31713483 |
| 32 | miR-668-3p | down | - | rat | DRG | SNL  Dorsal root transection  Ventral root transection | 28012097 |
| 33 | miR-341-3p | up | - | rat | DRG | CCI | 34394340 |
| 34 | miR-129-5p | down | Hmgb1 | rat | DRG | CCI | 31489582 |
| 35 | miR-1224-5p | down | - | rat | DRG | SNI | 31531524 |
| 36 | miR-330-5p | up | GABABR2 | mouse | Spinal cord | pancreatic cancer | 32621101 |

**Supplementary Table 9 The list of DE miRNAs targeting DE mRNAs**

| **No.** | **miRNA_name** | **up-down** | **mRNA_name (Target)** | **Gene_name (Target)** | **up-down** |
| --- | --- | --- | --- | --- | --- |
| 1 | mmu-miR-5107-5p | up | Pik3cd-204 | Pik3cd | up |
| 2 | mmu-miR-5107-5p | up | Mov10-207 | Mov10 | up |
| 3 | mmu-miR-5107-5p | up | Clec4n-201 | Clec4n | up |
| 4 | mmu-miR-5107-5p | up | Sh2d5-202 | Sh2d5 | up |
| 5 | mmu-miR-5107-5p | up | Zfp385a-202 | Zfp385a | up |
| 6 | mmu-miR-5107-5p | up | Rhoc-202 | Rhoc | up |
| 7 | mmu-miR-5107-5p | up | Clcf1-201 | Clcf1 | up |
| 8 | mmu-miR-5107-5p | up | Reep1-203 | Reep1 | up |
| 9 | mmu-miR-5107-5p | up | Cd177-201 | Cd177 | up |
| 10 | mmu-miR-5107-5p | up | Ngp-201 | Ngp | up |
| 11 | mmu-miR-5107-5p | up | Vps50-202 | Vps50 | up |
| 12 | mmu-miR-5107-5p | up | Dpf3-204 | Dpf3 | down |
| 13 | mmu-miR-5107-5p | up | Agbl5-202 | Agbl5 | down |
| 14 | mmu-miR-5107-5p | up | Tmem8b-209 | Tmem8b | down |
| 15 | mmu-miR-5107-5p | up | Phf7-206 | Phf7 | down |
| 16 | mmu-miR-5107-5p | up | Acap3-201 | Acap3 | down |
| 17 | mmu-miR-5107-5p | up | Rpap2-205 | Rpap2 | down |
| 18 | mmu-miR-5107-5p | up | U2surp-202 | U2surp | down |
| 19 | mmu-miR-5107-5p | up | Magi1-201 | Magi1 | down |
| 20 | mmu-miR-5107-5p | up | Myo18a-203 | Myo18a | down |
| 21 | mmu-miR-34b-5p | up | Eno3-201 | Eno3 | up |
| 22 | mmu-miR-34b-5p | up | Cga-201 | Cga | up |
| 23 | mmu-miR-34b-5p | up | Gramd1a-214 | Gramd1a | up |
| 24 | mmu-miR-199a-5p | up | Cacna1d-214 | Cacna1d | up |
| 25 | mmu-miR-199a-5p | up | Cacna1d-209 | Cacna1d | up |
| 26 | mmu-miR-199a-5p | up | Prrc2c-212 | Prrc2c | up |
| 27 | mmu-miR-199a-5p | up | Klrb1a-202 | Klrb1a | up |
| 28 | mmu-miR-199a-5p | up | Adam5-204 | Adam5 | down |
| 29 | mmu-miR-199a-5p | up | Paip2-202 | Paip2 | down |
| 30 | mmu-miR-199b-5p | up | Cacna1d-214 | Cacna1d | up |
| 31 | mmu-miR-199b-5p | up | Prrc2c-212 | Prrc2c | up |
| 32 | mmu-miR-199b-5p | up | Paip2-202 | Paip2 | down |
| 33 | mmu-miR-1188-5p | up | Dlgap4-205 | Dlgap4 | up |
| 34 | mmu-miR-1188-5p | up | Ecel1-203 | Ecel1 | up |
| 35 | mmu-miR-1188-5p | up | Mov10-207 | Mov10 | up |
| 36 | mmu-miR-1188-5p | up | Glis3-202 | Glis3 | up |
| 37 | mmu-miR-1188-5p | up | Tmem229b-204 | Tmem229b | up |
| 38 | mmu-miR-1188-5p | up | Itsn1-205 | Itsn1 | down |
| 39 | mmu-miR-200a-3p | up | Paip2-202 | Paip2 | down |
| 40 | **mmu-miR-18a-5p** | up | Mpv17-209 | Mpv17 | up |
| 41 | **mmu-miR-18a-5p** | up | Ear1-201 | Ear1 | up |
| 42 | **mmu-miR-449a-5p** | up | Ecel1-203 | Ecel1 | up |
| 43 | **mmu-miR-449a-5p** | up | Eno3-201 | Eno3 | up |
| 44 | **mmu-miR-449a-5p** | up | Cga-201 | Cga | up |
| 45 | **mmu-miR-449a-5p** | up | Spr-203 | Spr | up |
| 46 | **mmu-miR-449a-5p** | up | B4galt2-203 | B4galt2 | up |
| 47 | **mmu-miR-34c-5p** | up | Eno3-201 | Eno3 | up |
| 48 | **mmu-miR-34c-5p** | up | Cga-201 | Cga | up |
| 49 | **mmu-miR-34c-5p** | up | Spr-203 | Spr | up |
| 50 | **mmu-miR-34c-5p** | up | Gramd1a-214 | Gramd1a | up |
| 51 | **mmu-miR-34c-5p** | up | B4galt2-203 | B4galt2 | up |
| 52 | **mmu-miR-34c-5p** | up | Chl1-203 | Chl1 | up |
| 53 | **mmu-miR-34c-5p** | up | Dpf3-204 | Dpf3 | down |
| 54 | **mmu-miR-34c-5p** | up | Acap3-201 | Acap3 | down |
| 55 | mmu-miR-200c-3p | up | Il1rapl1-202 | Il1rapl1 | down |
| 56 | **mmu-miR-200b-3p** | up | Il1rapl1-202 | Il1rapl1 | down |
| 57 | mmu-miR-6540-5p | up | Fgfr2-206 | Fgfr2 | down |
| 58 | mmu-miR-212-5p | up | Ankrd1-205 | Ankrd1 | up |
| 59 | mmu-miR-212-5p | up | Ctsd-201 | Ctsd | down |
| 60 | **mmu-miR-221-3p** | up | Paip2-202 | Paip2 | down |
| 61 | mmu-miR-323-3p | up | Tmem255b-201 | Tmem255b | up |
| 62 | mmu-miR-222-3p | up | Mcemp1-201 | Mcemp1 | up |
| 63 | mmu-miR-222-3p | up | Paip2-202 | Paip2 | down |
| 64 | **mmu-miR-668-3p** | up | Stard10-204 | Stard10 | up |
| 65 | **mmu-miR-668-3p** | up | Kif28-201 | Kif28 | up |
| 66 | **mmu-miR-668-3p** | up | Ddx6-201 | Ddx6 | up |
| 67 | **mmu-miR-668-3p** | up | Dpf3-204 | Dpf3 | down |
| 68 | **mmu-miR-668-3p** | up | Cgnl1-202 | Cgnl1 | down |
| 69 | mmu-miR-214-5p | up | Anapc7-203 | Anapc7 | up |
| 70 | mmu-miR-143-5p | up | Kif28-201 | Kif28 | up |
| 71 | mmu-miR-143-5p | up | Zfp385a-202 | Zfp385a | up |
| 72 | mmu-miR-143-5p | up | Ryr3-201 | Ryr3 | down |
| 73 | mmu-miR-298-5p | up | Gm20431-201 | Gm20431 | up |
| 74 | mmu-miR-298-5p | up | Snrk-203 | Snrk | up |
| 75 | mmu-miR-298-5p | up | Eml4-203 | Eml4 | up |
| 76 | mmu-miR-298-5p | up | Ccnd3-215 | Ccnd3 | up |
| 77 | mmu-miR-298-5p | up | Chd5-205 | Chd5 | up |
| 78 | mmu-miR-298-5p | up | Grm1-202 | Grm1 | up |
| 79 | mmu-miR-298-5p | up | Dmtn-203 | Dmtn | up |
| 80 | mmu-miR-298-5p | up | Ripor2-202 | Ripor2 | up |
| 81 | mmu-miR-298-5p | up | Aqp9-202 | Aqp9 | up |
| 82 | mmu-miR-298-5p | up | Mov10-207 | Mov10 | up |
| 83 | mmu-miR-298-5p | up | Acad10-202 | Acad10 | up |
| 84 | mmu-miR-298-5p | up | Aatk-202 | Aatk | up |
| 85 | mmu-miR-298-5p | up | Fblim1-203 | Fblim1 | up |
| 86 | mmu-miR-298-5p | up | Liph-202 | Liph | up |
| 87 | mmu-miR-298-5p | up | Lmx1b-203 | Lmx1b | up |
| 88 | mmu-miR-298-5p | up | Gtse1-201 | Gtse1 | up |
| 89 | mmu-miR-298-5p | up | Tmc4-202 | Tmc4 | up |
| 90 | mmu-miR-298-5p | up | Cd177-201 | Cd177 | up |
| 91 | mmu-miR-298-5p | up | Phc2-201 | Phc2 | down |
| 92 | mmu-miR-298-5p | up | Dpf3-204 | Dpf3 | down |
| 93 | mmu-miR-298-5p | up | Usp21-201 | Usp21 | down |
| 94 | mmu-miR-298-5p | up | Efr3b-203 | Efr3b | down |
| 95 | mmu-miR-298-5p | up | Cybc1-202 | Cybc1 | down |
| 96 | mmu-miR-298-5p | up | Ctsd-201 | Ctsd | down |
| 97 | mmu-miR-298-5p | up | Myo18a-203 | Myo18a | down |
| 98 | mmu-miR-431-3p | up | Ank2-207 | Ank2 | up |
| 99 | mmu-miR-181c-3p | up | Wdr27-208 | Wdr27 | up |
| 100 | mmu-miR-383-5p | down | Slfn4-202 | Slfn4 | up |
| 101 | mmu-miR-383-5p | down | Anapc5-205 | Anapc5 | up |
| 102 | **mmu-miR-1224-5p** | down | Gtf2i-206 | Gtf2i | up |
| 103 | **mmu-miR-1224-5p** | down | Gm20431-201 | Gm20431 | up |
| 104 | **mmu-miR-1224-5p** | down | Bean1-203 | Bean1 | up |
| 105 | **mmu-miR-1224-5p** | down | Stum-205 | Stum | up |
| 106 | **mmu-miR-1224-5p** | down | Ecel1-203 | Ecel1 | up |
| 107 | **mmu-miR-1224-5p** | down | Acad10-202 | Acad10 | up |
| 108 | **mmu-miR-1224-5p** | down | Capn5-202 | Capn5 | up |
| 109 | **mmu-miR-1224-5p** | down | Gm12695-201 | Gm12695 | up |
| 110 | **mmu-miR-1224-5p** | down | Pclo-202 | Pclo | down |
| 111 | **mmu-miR-1224-5p** | down | Tmem8b-209 | Tmem8b | down |
| 112 | **mmu-miR-1224-5p** | down | Kctd15-201 | Kctd15 | down |
| 113 | **mmu-miR-1224-5p** | down | Itsn1-205 | Itsn1 | down |
| 114 | **mmu-miR-1224-5p** | down | Cpne4-202 | Cpne4 | down |
| 115 | **mmu-miR-34a-5p** | down | Eno3-201 | Eno3 | up |
| 116 | **mmu-miR-34a-5p** | down | Cga-201 | Cga | up |
| 117 | **mmu-miR-34a-5p** | down | Spr-203 | Spr | up |
| 118 | **mmu-miR-34a-5p** | down | Gramd1a-214 | Gramd1a | up |
| 119 | **mmu-miR-34a-5p** | down | Sipa1-203 | Sipa1 | up |
| 120 | **mmu-miR-34a-5p** | down | B4galt2-203 | B4galt2 | up |
| 121 | **mmu-miR-34a-5p** | down | Inpp4a-201 | Inpp4a | down |
| 122 | mmu-miR-574-3p | down | Atl2-202 | Atl2 | up |
| 123 | **mmu-miR-330-5p** | down | Macf1-201 | Macf1 | up |
| 124 | **mmu-miR-330-5p** | down | Rims1-203 | Rims1 | up |
| 125 | **mmu-miR-330-5p** | down | Dlgap4-205 | Dlgap4 | up |
| 126 | **mmu-miR-330-5p** | down | Dtnb-223 | Dtnb | up |
| 127 | **mmu-miR-330-5p** | down | Dmtn-203 | Dmtn | up |
| 128 | **mmu-miR-330-5p** | down | Acox1-202 | Acox1 | up |
| 129 | **mmu-miR-330-5p** | down | Mfhas1-203 | Mfhas1 | up |
| 130 | **mmu-miR-330-5p** | down | Slc28a2-202 | Slc28a2 | up |
| 131 | **mmu-miR-330-5p** | down | Emilin2-201 | Emilin2 | up |
| 132 | **mmu-miR-330-5p** | down | Lmx1b-203 | Lmx1b | up |
| 133 | **mmu-miR-330-5p** | down | Tcf4-238 | Tcf4 | up |
| 134 | **mmu-miR-330-5p** | down | Inava-201 | Inava | up |
| 135 | **mmu-miR-330-5p** | down | Greb1-201 | Greb1 | down |
| 136 | mmu-miR-7043-3p | down | Zfp202-203 | Zfp202 | up |
| 137 | mmu-miR-7043-3p | down | Psd3-204 | Psd3 | down |
| 138 | mmu-miR-134-3p | down | Ambra1-204 | Ambra1 | up |
| 139 | mmu-miR-134-3p | down | Cyp4f17-204 | Cyp4f17 | up |
| 140 | mmu-miR-134-3p | down | Lmx1b-203 | Lmx1b | up |
| 141 | mmu-miR-134-3p | down | Rgs6-206 | Rgs6 | down |
| 142 | mmu-miR-3102-3p | down | Gm20431-201 | Gm20431 | up |
| 143 | mmu-miR-3102-3p | down | Ccny-202 | Ccny | up |
| 144 | mmu-miR-3102-3p | down | Ripor2-202 | Ripor2 | up |
| 145 | mmu-miR-3102-3p | down | Mfhas1-203 | Mfhas1 | up |
| 146 | mmu-miR-3102-3p | down | Spr-203 | Spr | up |
| 147 | mmu-miR-3102-3p | down | Dennd2d-204 | Dennd2d | up |
| 148 | mmu-miR-3102-3p | down | B4galt2-203 | B4galt2 | up |
| 149 | mmu-miR-3102-3p | down | Kctd15-201 | Kctd15 | down |
| 150 | mmu-miR-3470b | down | Slc28a2-202 | Slc28a2 | up |
| 151 | mmu-miR-3470b | down | Elf1-202 | Elf1 | up |
| 152 | mmu-miR-3470b | down | Grid2ip-201 | Grid2ip | up |
| 153 | mmu-miR-3470b | down | Dlgap5-201 | Dlgap5 | up |
| 154 | mmu-miR-3470b | down | Kif28-201 | Kif28 | up |
| 155 | mmu-miR-3470b | down | Nwd1-204 | Nwd1 | up |
| 156 | mmu-miR-3470b | down | Dhx30-202 | Dhx30 | down |
| 157 | mmu-miR-216a-3p | down | Liph-202 | Liph | up |
| 158 | mmu-miR-5620-5p | down | Slc45a4-205 | Slc45a4 | up |
| 159 | mmu-miR-5620-5p | down | Zfp663-201 | Zfp663 | up |
| 160 | mmu-miR-5620-5p | down | Scnn1b-201 | Scnn1b | up |
| 161 | mmu-miR-5620-5p | down | B4galt2-203 | B4galt2 | up |
| 162 | mmu-miR-5128 | down | Sorbs2-202 | Sorbs2 | up |
| 163 | mmu-miR-5128 | down | Irf5-201 | Irf5 | up |
| 164 | mmu-miR-5128 | down | Espn-213 | Espn | up |
| 165 | mmu-miR-1195 | down | Il1rl1-201 | Il1rl1 | up |
| 166 | mmu-miR-1195 | down | Stil-201 | Stil | up |
| 167 | mmu-miR-1195 | down | Akap5-202 | Akap5 | up |
| 168 | mmu-miR-1195 | down | Vps50-202 | Vps50 | up |
| 169 | mmu-miR-6954-3p | down | Cacna1a-202 | Cacna1a | up |
| 170 | mmu-miR-6954-3p | down | Stard10-204 | Stard10 | up |
| 171 | mmu-miR-6954-3p | down | Aatk-202 | Aatk | up |
| 172 | mmu-miR-6954-3p | down | Liph-202 | Liph | up |
| 173 | mmu-miR-6954-3p | down | Grid2ip-201 | Grid2ip | up |
| 174 | mmu-miR-6954-3p | down | Cdh26-201 | Cdh26 | up |
| 175 | mmu-miR-6954-3p | down | Stum-201 | Stum | up |
| 176 | mmu-miR-6954-3p | down | Mark2-221 | Mark2 | down |
| 177 | mmu-miR-6954-3p | down | Odf2-208 | Odf2 | down |
| 178 | mmu-miR-1941-5p | down | Brpf3-218 | Brpf3 | up |
| 179 | mmu-miR-1941-5p | down | Mfhas1-203 | Mfhas1 | up |
| 180 | mmu-miR-1941-5p | down | Raet1e-204 | Raet1e | up |
| 181 | mmu-miR-1941-5p | down | Inava-201 | Inava | up |
| 182 | mmu-miR-1941-5p | down | Svil-211 | Svil | up |
| 183 | mmu-miR-1941-5p | down | Myo18a-203 | Myo18a | down |

Note: The DE miRNAs with bold red font have been reported to be involved in pain. The genes with a red background are known pain genes.

**Supplementary Table 10 Pain specific PPI network associated with the DE mRNAs targeted by DE miRNAs in the TG of CCI-ION mice**

| **DE_miRNA_name** | **Targeted DE_mRNA_name** | **Targeted DE_mRNA_gene_name** | **protein A** | **PPI** | **Protein B** |
| --- | --- | --- | --- | --- | --- |
| mmu-miR-125a-3p | Pik3cd-204 | Pik3cd | PIK3CD | Positive Regulation | PLCG1 |
| mmu-miR-12185-5p | Spr-203 | Spr | PAX3 | Binding | SPR |
| mmu-miR-1195 | Il1rl1-201 | Il1rl1 | IL1RL1 | Binding | IL33 |
| mmu-miR-149-3p | Cga-201 | Cga | DNM2 | Regulation | CGA |
| mmu-miR-6948-3p | Cacna1a-202 | Cacna1a | ATP1A2 | Binding | CACNA1A |
| mmu-miR-149-3p | Cga-201 | Cga | DLG4 | Binding | PIK3CD |
| mmu-miR-125a-3p | Pik3cd-204 | Pik3cd | GNRH1 | Regulation | CGA |
| mmu-miR-149-3p | Cga-201 | Cga | POMC | Regulation | CGA |

Note: Protein names with red color represent the protein encoded by DE mRNAs predicted to be targeted by DE miRNAs in the TG of CCI-ION mice.

**Supplementary Table 11 The negative regulatory network of DE miRNAs targeting DE mRNAs**

| **No.** | **sRNA** | **up-down** | **Target_mRNA_name** | **Target_gene_name** | **up-down** |
| --- | --- | --- | --- | --- | --- |
| 1 | mmu-miR-5107-5p | up | Dpf3-204 | Dpf3 | down |
| 2 | mmu-miR-5107-5p | up | Agbl5-202 | Agbl5 | down |
| 3 | mmu-miR-5107-5p | up | Tmem8b-209 | Tmem8b | down |
| 4 | mmu-miR-5107-5p | up | Phf7-206 | Phf7 | down |
| 5 | mmu-miR-5107-5p | up | Acap3-201 | Acap3 | down |
| 6 | mmu-miR-5107-5p | up | Rpap2-205 | Rpap2 | down |
| 7 | mmu-miR-5107-5p | up | U2surp-202 | U2surp | down |
| 8 | mmu-miR-5107-5p | up | Magi1-201 | Magi1 | down |
| 9 | mmu-miR-5107-5p | up | Myo18a-203 | Myo18a | down |
| 10 | mmu-miR-199a-5p | up | Adam5-204 | Adam5 | down |
| 11 | mmu-miR-199a-5p | up | Paip2-202 | Paip2 | down |
| 12 | mmu-miR-199b-5p | up | Paip2-202 | Paip2 | down |
| 13 | mmu-miR-1188-5p | up | Itsn1-205 | Itsn1 | down |
| 14 | mmu-miR-200a-3p | up | Paip2-202 | Paip2 | down |
| 15 | **mmu-miR-34c-5p** | up | Dpf3-204 | Dpf3 | down |
| 16 | **mmu-miR-34c-5p** | up | Acap3-201 | Acap3 | down |
| 17 | mmu-miR-200c-3p | up | Il1rapl1-202 | Il1rapl1 | down |
| 18 | **mmu-miR-200b-3p** | up | Il1rapl1-202 | Il1rapl1 | down |
| 19 | mmu-miR-6540-5p | up | Fgfr2-206 | Fgfr2 | down |
| 20 | mmu-miR-212-5p | up | Ctsd-201 | Ctsd | down |
| 21 | **mmu-miR-221-3p** | up | Paip2-202 | Paip2 | down |
| 22 | mmu-miR-222-3p | up | Paip2-202 | Paip2 | down |
| 23 | **mmu-miR-668-3p** | up | Dpf3-204 | Dpf3 | down |
| 24 | **mmu-miR-668-3p** | up | Cgnl1-202 | Cgnl1 | down |
| 25 | mmu-miR-143-5p | up | Ryr3-201 | Ryr3 | down |
| 26 | mmu-miR-298-5p | up | Phc2-201 | Phc2 | down |
| 27 | mmu-miR-298-5p | up | Dpf3-204 | Dpf3 | down |
| 28 | mmu-miR-298-5p | up | Usp21-201 | Usp21 | down |
| 29 | mmu-miR-298-5p | up | Efr3b-203 | Efr3b | down |
| 30 | mmu-miR-298-5p | up | Cybc1-202 | Cybc1 | down |
| 31 | mmu-miR-298-5p | up | Ctsd-201 | Ctsd | down |
| 32 | mmu-miR-298-5p | up | Myo18a-203 | Myo18a | down |
| 33 | mmu-miR-383-5p | down | Slfn4-202 | Slfn4 | up |
| 34 | mmu-miR-383-5p | down | Anapc5-205 | Anapc5 | up |
| 35 | **mmu-miR-1224-5p** | down | Gtf2i-206 | Gtf2i | up |
| 36 | **mmu-miR-1224-5p** | down | Gm20431-201 | Gm20431 | up |
| 37 | **mmu-miR-1224-5p** | down | Bean1-203 | Bean1 | up |
| 38 | **mmu-miR-1224-5p** | down | Stum-205 | Stum | up |
| 39 | **mmu-miR-1224-5p** | down | Ecel1-203 | Ecel1 | up |
| 40 | **mmu-miR-1224-5p** | down | Acad10-202 | Acad10 | up |
| 41 | **mmu-miR-1224-5p** | down | Capn5-202 | Capn5 | up |
| 42 | **mmu-miR-1224-5p** | down | Gm12695-201 | Gm12695 | up |
| 43 | **mmu-miR-34a-5p** | down | Eno3-201 | Eno3 | up |
| 44 | **mmu-miR-34a-5p** | down | Cga-201 | Cga | up |
| 45 | **mmu-miR-34a-5p** | down | Spr-203 | Spr | up |
| 46 | **mmu-miR-34a-5p** | down | Gramd1a-214 | Gramd1a | up |
| 47 | **mmu-miR-34a-5p** | down | Sipa1-203 | Sipa1 | up |
| 48 | **mmu-miR-34a-5p** | down | B4galt2-203 | B4galt2 | up |
| 49 | mmu-miR-574-3p | down | Atl2-202 | Atl2 | up |
| 50 | **mmu-miR-330-5p** | down | Macf1-201 | Macf1 | up |
| 51 | **mmu-miR-330-5p** | down | Rims1-203 | Rims1 | up |
| 52 | **mmu-miR-330-5p** | down | Dlgap4-205 | Dlgap4 | up |
| 53 | **mmu-miR-330-5p** | down | Dtnb-223 | Dtnb | up |
| 54 | **mmu-miR-330-5p** | down | Dmtn-203 | Dmtn | up |
| 55 | **mmu-miR-330-5p** | down | Acox1-202 | Acox1 | up |
| 56 | **mmu-miR-330-5p** | down | Mfhas1-203 | Mfhas1 | up |
| 57 | **mmu-miR-330-5p** | down | Slc28a2-202 | Slc28a2 | up |
| 58 | **mmu-miR-330-5p** | down | Emilin2-201 | Emilin2 | up |
| 59 | **mmu-miR-330-5p** | down | Lmx1b-203 | Lmx1b | up |
| 60 | **mmu-miR-330-5p** | down | Tcf4-238 | Tcf4 | up |
| 61 | **mmu-miR-330-5p** | down | Inava-201 | Inava | up |
| 62 | mmu-miR-7043-3p | down | Zfp202-203 | Zfp202 | up |
| 63 | mmu-miR-134-3p | down | Ambra1-204 | Ambra1 | up |
| 64 | mmu-miR-134-3p | down | Cyp4f17-204 | Cyp4f17 | up |
| 65 | mmu-miR-134-3p | down | Lmx1b-203 | Lmx1b | up |
| 66 | mmu-miR-3102-3p | down | Gm20431-201 | Gm20431 | up |
| 67 | mmu-miR-3102-3p | down | Ccny-202 | Ccny | up |
| 68 | mmu-miR-3102-3p | down | Ripor2-202 | Ripor2 | up |
| 69 | mmu-miR-3102-3p | down | Mfhas1-203 | Mfhas1 | up |
| 70 | mmu-miR-3102-3p | down | Spr-203 | Spr | up |
| 71 | mmu-miR-3102-3p | down | Dennd2d-204 | Dennd2d | up |
| 72 | mmu-miR-3102-3p | down | B4galt2-203 | B4galt2 | up |
| 73 | mmu-miR-3470b | down | Slc28a2-202 | Slc28a2 | up |
| 74 | mmu-miR-3470b | down | Elf1-202 | Elf1 | up |
| 75 | mmu-miR-3470b | down | Grid2ip-201 | Grid2ip | up |
| 76 | mmu-miR-3470b | down | Dlgap5-201 | Dlgap5 | up |
| 77 | mmu-miR-3470b | down | Kif28-201 | Kif28 | up |
| 78 | mmu-miR-3470b | down | Nwd1-204 | Nwd1 | up |
| 79 | mmu-miR-216a-3p | down | Liph-202 | Liph | up |
| 80 | mmu-miR-5620-5p | down | Slc45a4-205 | Slc45a4 | up |
| 81 | mmu-miR-5620-5p | down | Zfp663-201 | Zfp663 | up |
| 82 | mmu-miR-5620-5p | down | Scnn1b-201 | Scnn1b | up |
| 83 | mmu-miR-5620-5p | down | B4galt2-203 | B4galt2 | up |
| 84 | mmu-miR-5128 | down | Sorbs2-202 | Sorbs2 | up |
| 85 | mmu-miR-5128 | down | Irf5-201 | Irf5 | up |
| 86 | mmu-miR-5128 | down | Espn-213 | Espn | up |
| 87 | mmu-miR-1195 | down | Il1rl1-201 | Il1rl1 | up |
| 88 | mmu-miR-1195 | down | Stil-201 | Stil | up |
| 89 | mmu-miR-1195 | down | Akap5-202 | Akap5 | up |
| 90 | mmu-miR-1195 | down | Vps50-202 | Vps50 | up |
| 91 | mmu-miR-6954-3p | down | Cacna1a-202 | Cacna1a | up |
| 92 | mmu-miR-6954-3p | down | Stard10-204 | Stard10 | up |
| 93 | mmu-miR-6954-3p | down | Aatk-202 | Aatk | up |
| 94 | mmu-miR-6954-3p | down | Liph-202 | Liph | up |
| 95 | mmu-miR-6954-3p | down | Grid2ip-201 | Grid2ip | up |
| 96 | mmu-miR-6954-3p | down | Cdh26-201 | Cdh26 | up |
| 97 | mmu-miR-6954-3p | down | Stum-201 | Stum | up |
| 98 | mmu-miR-1941-5p | down | Brpf3-218 | Brpf3 | up |
| 99 | mmu-miR-1941-5p | down | Mfhas1-203 | Mfhas1 | up |
| 100 | mmu-miR-1941-5p | down | Raet1e-204 | Raet1e | up |
| 101 | mmu-miR-1941-5p | down | Inava-201 | Inava | up |
| 102 | mmu-miR-1941-5p | down | Svil-211 | Svil | up |

Note: The DE miRNAs with bold red font have been reported to be involved in pain. The genes with a red background are known pain genes.

**Supplementary Table 12 The list of DE lncRNAs targeting DE mRNAs related to pain genes in co-expression**

| **No.** | **lncRNA_name** | **Targeted DE_mRNA_name** | **Targeted mRNA_Gene_Symbol** | **Pearson_correlation** | ***P* value** |
| --- | --- | --- | --- | --- | --- |
| 1 | TCONS_00261438 | Grin2a-201 | Grin2a | 0.985651708 | 0.000307333 |
| 2 | TCONS_00261438 | Ncam1-203 | Ncam1 | 0.985651708 | 0.000307333 |
| 3 | TCONS_00261438 | Dlg2-219 | Dlg2 | 0.985651708 | 0.000307333 |
| 4 | TCONS_00261438 | Grm1-202 | Grm1 | 0.985651708 | 0.000307333 |
| 5 | TCONS_00261438 | Ano1-202 | Ano1 | 0.987068868 | 0.00024974 |
| 6 | TCONS_00261438 | Chrm1-201 | Chrm1 | 0.998091491 | 5.46E-06 |
| 7 | TCONS_00261438 | Synpr-201 | Synpr | 0.985651708 | 0.000307333 |
| 8 | Gm45844-203 | Rps6ka3-207 | Rps6ka3 | 0.99760451 | 8.60E-06 |
| 9 | TCONS_00092020 | Mtdh-206 | Mtdh | 0.990018707 | 0.000148942 |
| 10 | TCONS_00092020 | Cacna1a-202 | Cacna1a | 0.976216464 | 0.000841758 |
| 11 | 9530026P05Rik-203 | Mtdh-206 | Mtdh | 0.983871572 | 0.000388092 |
| 12 | 9530026P05Rik-203 | Cacna1a-202 | Cacna1a | 0.994729179 | 4.16E-05 |
| 13 | Cinp-212 | Gal-202 | Gal | 0.97202723 | 0.00116277 |
| 14 | Cinp-212 | Spp1-203 | Spp1 | 0.987447027 | 0.000235377 |
| 15 | Cinp-212 | Slc6a4-201 | Slc6a4 | 0.992494094 | 8.43E-05 |
| 16 | Cinp-212 | Sprr1a-201 | Sprr1a | 0.989534731 | 0.00016371 |
| 17 | Ubl3-203 | Cck-202 | Cck | 0.98404539 | 0.000379794 |
| 18 | Dtl-204 | Vip-201 | Vip | 0.986751375 | 0.000262126 |
| 19 | Dtl-204 | Stmn4-209 | Stmn4 | 0.974721695 | 0.000950413 |
| 20 | Kif23-210 | Il1rl1-201 | Il1rl1 | 0.972368477 | 0.001134703 |
| 21 | Fam162a-204 | Ddc-210 | Ddc | -0.976336447 | 0.00083332 |
| 22 | 4933424M12Rik-202 | Ddc-210 | Ddc | -0.976988225 | 0.00078822 |
| 23 | Rbfox3-207 | Ddc-210 | Ddc | -0.966120287 | 0.001702308 |
| 24 | Rbfox3-207 | Cck-202 | Cck | 0.974173934 | 0.000991866 |
| 25 | Zfp384-209 | Nlrp3-203 | Nlrp3 | 0.973682779 | 0.001029781 |
| 26 | Zfp384-209 | Sprr1a-201 | Sprr1a | 0.973371748 | 0.001054155 |
| 27 | Zfp384-209 | Spp1-203 | Spp1 | 0.980022702 | 0.000594652 |
| 28 | Zfp384-209 | Gal-202 | Gal | 0.963223827 | 0.002003861 |
| 29 | Zfp384-209 | Slc6a4-201 | Slc6a4 | 0.97878417 | 0.000670392 |
| 30 | Anxa10-203 | Cttn-201 | Cttn | 0.952555442 | 0.003323081 |
| 31 | Dleu2-212 | Il1rl1-201 | Il1rl1 | 0.997112727 | 1.25E-05 |
| 32 | Mx1-205 | Gal-202 | Gal | 0.964192956 | 0.001900262 |
| 33 | Mx1-205 | Sprr1a-201 | Sprr1a | 0.985751107 | 0.0003031 |
| 34 | Mx1-205 | Spp1-203 | Spp1 | 0.990681415 | 0.000129849 |
| 35 | Mx1-205 | Slc6a4-201 | Slc6a4 | 0.991516475 | 0.00010765 |
| 36 | Tchp-202 | Mtdh-206 | Mtdh | 0.9972574 | 1.13E-05 |
| 37 | Tchp-202 | Cacna1a-202 | Cacna1a | 0.988590193 | 0.000194533 |
| 38 | TCONS_00224056 | Grin2a-201 | Grin2a | 0.98636107 | 0.000277762 |
| 39 | TCONS_00224056 | Ncam1-203 | Ncam1 | 0.98636107 | 0.000277762 |
| 40 | TCONS_00224056 | Dlg2-219 | Dlg2 | 0.98636107 | 0.000277762 |
| 41 | TCONS_00224056 | Grm1-202 | Grm1 | 0.98636107 | 0.000277762 |
| 42 | TCONS_00224056 | Ano1-202 | Ano1 | 0.963031786 | 0.002024712 |
| 43 | TCONS_00224056 | Chrm1-201 | Chrm1 | 0.980438581 | 0.000570231 |
| 44 | TCONS_00224056 | Synpr-201 | Synpr | 0.98636107 | 0.000277762 |
| 45 | TCONS_00284660 | Grin2a-201 | Grin2a | 0.987209398 | 0.000244353 |
| 46 | TCONS_00284660 | Ncam1-203 | Ncam1 | 0.987209398 | 0.000244353 |
| 47 | TCONS_00284660 | Dlg2-219 | Dlg2 | 0.987209398 | 0.000244353 |
| 48 | TCONS_00284660 | Grm1-202 | Grm1 | 0.987209398 | 0.000244353 |
| 49 | TCONS_00284660 | Ano1-202 | Ano1 | 0.964101552 | 0.001909917 |
| 50 | TCONS_00284660 | Chrm1-201 | Chrm1 | 0.980947534 | 0.000541037 |
| 51 | TCONS_00284660 | Synpr-201 | Synpr | 0.987209398 | 0.000244353 |
| 52 | E330011O21Rik-209 | Vip-201 | Vip | 0.992437969 | 8.56E-05 |
| 53 | E330011O21Rik-209 | Stmn4-209 | Stmn4 | 0.980211854 | 0.000583482 |
| 54 | Dda1-210 | Sprr1a-201 | Sprr1a | 0.959519928 | 0.002424788 |
| 55 | Dda1-210 | Slc6a4-201 | Slc6a4 | 0.95747672 | 0.002673898 |
| 56 | Dda1-210 | Ddc-210 | Ddc | -0.975722324 | 0.000876954 |
| 57 | TCONS_00090863 | Prkar1b-209 | Prkar1b | 0.984513363 | 0.000357897 |
| 58 | Mtss1-211 | Frmpd4-206 | Frmpd4 | 1 | 0 |
| 59 | Mtss1-211 | Ddr1-212 | Ddr1 | 0.99697935 | 1.37E-05 |
| 60 | Ptprt-206 | Ddr1-203 | Ddr1 | 0.953656735 | 0.003171782 |
| 61 | Tbc1d23-210 | Mapk8-202 | Mapk8 | 0.995692467 | 2.78E-05 |
| 62 | TCONS_00013345 | Ephb2-201 | Ephb2 | 0.965994396 | 0.00171491 |
| 63 | TCONS_00013345 | Cacna1a-202 | Cacna1a | 0.95965001 | 0.002409335 |
| 64 | TCONS_00013345 | Zeb2-221 | Zeb2 | 0.984445541 | 0.00036103 |
| 65 | TCONS_00092230 | Sparc-208 | Sparc | 0.954205777 | 0.003097649 |
| 66 | TCONS_00092230 | Stmn4-209 | Stmn4 | 0.95571209 | 0.002898695 |
| 67 | TCONS_00092230 | Col11a2-211 | Col11a2 | 0.989642388 | 0.000160365 |
| 68 | TCONS_00081846 | Mapk8-202 | Mapk8 | 0.97454307 | 0.000963834 |
| 69 | TCONS_00081846 | Prkar1b-209 | Prkar1b | 0.983177116 | 0.000422134 |
| 70 | Rars2-202 | Sprr1a-201 | Sprr1a | 0.965482452 | 0.001766629 |
| 71 | Rars2-202 | Slc6a4-201 | Slc6a4 | 0.950263215 | 0.003649104 |
| 72 | Rars2-202 | Gal-202 | Gal | 0.973391352 | 0.001052611 |
| 73 | Slc44a1-207 | Gal-202 | Gal | 0.953637154 | 0.003174441 |
| 74 | Slc44a1-207 | Sprr1a-201 | Sprr1a | 0.965683172 | 0.00174626 |
| 75 | Slc44a1-207 | Slc6a4-201 | Slc6a4 | 0.962001499 | 0.002138396 |
| 76 | Slc44a1-207 | Ddc-210 | Ddc | -0.973574625 | 0.001038224 |
| 77 | Fkbp5-215 | Spp1-203 | Spp1 | 0.96237592 | 0.002096727 |
| 78 | Mrpl33-209 | Mtdh-206 | Mtdh | 0.993700374 | 5.94E-05 |
| 79 | Mrpl33-209 | Cacna1a-202 | Cacna1a | 0.996925345 | 1.42E-05 |
| 80 | Aplp1-204 | Grin2a-201 | Grin2a | 0.999976431 | 8.33E-10 |
| 81 | Aplp1-204 | Ncam1-203 | Ncam1 | 0.999976431 | 8.33E-10 |
| 82 | Aplp1-204 | Synpr-201 | Synpr | 0.999976431 | 8.33E-10 |
| 83 | Aplp1-204 | Dlg2-219 | Dlg2 | 0.999976431 | 8.33E-10 |
| 84 | Aplp1-204 | Grm1-202 | Grm1 | 0.999976431 | 8.33E-10 |
| 85 | Aplp1-204 | Ano1-202 | Ano1 | 0.983604115 | 0.000401034 |
| 86 | Aplp1-204 | Chrm1-201 | Chrm1 | 0.983896793 | 0.000386882 |
| 87 | Rars2-204 | Mtdh-206 | Mtdh | 0.976700094 | 0.000808004 |
| 88 | Rars2-204 | Cacna1a-202 | Cacna1a | 0.95726095 | 0.002700905 |
| 89 | Gm14453-201 | Il1rl1-201 | Il1rl1 | 0.976830764 | 0.000799001 |
| 90 | Ccnb1-204 | Il1rl1-201 | Il1rl1 | 0.985652148 | 0.000307314 |
| 91 | TCONS_00066323 | Ddc-210 | Ddc | -0.96548732 | 0.001766133 |
| 92 | TCONS_00066323 | Cck-202 | Cck | 0.972969368 | 0.001086108 |
| 93 | Farp1-204 | Rps6ka3-207 | Rps6ka3 | 0.98466719 | 0.00035084 |
| 94 | TCONS_00016125 | Sparc-208 | Sparc | 0.968207838 | 0.001500046 |
| 95 | TCONS_00016125 | Stmn4-209 | Stmn4 | 0.961550022 | 0.002189179 |
| 96 | TCONS_00016125 | Tcf19-202 | Tcf19 | 0.960103582 | 0.002355834 |
| 97 | TCONS_00016125 | Col11a2-211 | Col11a2 | 0.999854738 | 3.17E-08 |
| 98 | TCONS_00127351 | Ano1-202 | Ano1 | 0.979201637 | 0.000644359 |
| 99 | TCONS_00127351 | Chrm1-201 | Chrm1 | 0.987384394 | 0.000237726 |
| 100 | TCONS_00228568 | Sprr1a-201 | Sprr1a | 0.95243138 | 0.003340342 |
| 101 | TCONS_00228568 | Gal-202 | Gal | 0.952148641 | 0.003379845 |
| 102 | TCONS_00228568 | Ddc-210 | Ddc | -0.967572069 | 0.001560306 |
| 103 | TCONS_00177463 | Rps6ka3-207 | Rps6ka3 | 0.998355605 | 4.05E-06 |
| 104 | 3110039I08Rik-213 | Mtdh-206 | Mtdh | 0.987979302 | 0.000215877 |
| 105 | 3110039I08Rik-213 | Cacna1a-202 | Cacna1a | 0.996953144 | 1.39E-05 |
| 106 | Tnrc6a-209 | Il1rl1-201 | Il1rl1 | 0.994216002 | 5.01E-05 |
| 107 | 1810007D17Rik-201 | Spp1-203 | Spp1 | 0.966688649 | 0.001645987 |
| 108 | Gm10684-202 | Ctsd-201 | Ctsd | 0.980260731 | 0.000580613 |
| 109 | Gm10684-202 | Ddr1-203 | Ddr1 | 0.978781695 | 0.000670548 |
| 110 | Gm47715-201 | Prkar1b-209 | Prkar1b | 0.998168239 | 5.03E-06 |
| 111 | TCONS_00200174 | Csnk1e-213 | Csnk1e | 0.980041491 | 0.000593538 |
| 112 | A630023A22Rik-202 | Cck-202 | Cck | 0.997108801 | 1.25E-05 |
| 113 | Ryr3-208 | Il1rl1-201 | Il1rl1 | 0.967662085 | 0.001551703 |
| 114 | TCONS_00269877 | Il1rl1-201 | Il1rl1 | 0.981686168 | 0.000500023 |
| 115 | TCONS_00200175 | Cck-202 | Cck | 0.961828771 | 0.002157756 |
| 116 | Plppr3-202 | Chrm1-201 | Chrm1 | 0.968774181 | 0.001447354 |
| 117 | Plppr3-202 | Cacna1a-213 | Cacna1a | 0.955610573 | 0.002911899 |
| 118 | Plppr3-202 | Ano1-202 | Ano1 | 0.980253944 | 0.000581011 |
| 119 | Cdcp1-203 | Nlrp3-203 | Nlrp3 | 0.989422481 | 0.000167234 |
| 120 | Cdcp1-203 | Sprr1a-201 | Sprr1a | 0.991356055 | 0.000111754 |
| 121 | Cdcp1-203 | Spp1-203 | Spp1 | 0.98162753 | 0.000503221 |
| 122 | Cdcp1-203 | Slc6a4-201 | Slc6a4 | 0.99045267 | 0.000136292 |
| 123 | Cdcp1-203 | Gal-202 | Gal | 0.98806786 | 0.000212715 |
| 124 | Mms22l-210 | Tcf19-202 | Tcf19 | 0.993884707 | 5.60E-05 |
| 125 | Mms22l-210 | Sparc-208 | Sparc | 0.99004218 | 0.000148244 |
| 126 | Mms22l-210 | Zeb2-224 | Zeb2 | 0.99862971 | 2.82E-06 |
| 127 | Mms22l-210 | Cttn-201 | Cttn | 0.977201865 | 0.000773708 |
| 128 | Mms22l-210 | Nlrp3-203 | Nlrp3 | 0.968634688 | 0.001460246 |
| 129 | Gas7-210 | Grin2a-201 | Grin2a | 0.979098038 | 0.000650772 |
| 130 | Gas7-210 | Ncam1-203 | Ncam1 | 0.979098038 | 0.000650772 |
| 131 | Gas7-210 | Dlg2-219 | Dlg2 | 0.979098038 | 0.000650772 |
| 132 | Gas7-210 | Grm1-202 | Grm1 | 0.979098038 | 0.000650772 |
| 133 | Gas7-210 | Ano1-202 | Ano1 | 0.954120593 | 0.003109094 |
| 134 | Gas7-210 | Chrm1-201 | Chrm1 | 0.975738279 | 0.000875806 |
| 135 | Gas7-210 | Synpr-201 | Synpr | 0.979098038 | 0.000650772 |
| 136 | TCONS_00087827 | Rps6ka3-207 | Rps6ka3 | 0.988669306 | 0.00019185 |
| 137 | Elk4-203 | Frmpd4-206 | Frmpd4 | 0.967045862 | 0.001611069 |
| 138 | Elk4-203 | Ddr1-212 | Ddr1 | 0.983336877 | 0.000414176 |
| 139 | TCONS_00252476 | Sparc-208 | Sparc | 0.982260487 | 0.000469244 |
| 140 | TCONS_00252476 | Zeb2-224 | Zeb2 | 0.961737306 | 0.002168042 |
| 141 | TCONS_00252476 | Tcf19-202 | Tcf19 | 0.976065181 | 0.000852457 |
| 142 | TCONS_00252476 | Col11a2-211 | Col11a2 | 0.99670194 | 1.63E-05 |
| 143 | Nwd1-203 | Mtdh-206 | Mtdh | 0.996382015 | 1.96E-05 |
| 144 | Nwd1-203 | Cacna1a-202 | Cacna1a | 0.986871693 | 0.000257397 |
| 145 | Ccdc162-206 | Mtdh-206 | Mtdh | 0.991020477 | 0.000120586 |
| 146 | Ccdc162-206 | Cacna1a-202 | Cacna1a | 0.978404018 | 0.000694544 |
| 147 | Anxa1-203 | Il1rl1-201 | Il1rl1 | 0.968067917 | 0.001513207 |
| 148 | Exosc7-206 | Il1rl1-201 | Il1rl1 | 0.967248964 | 0.001591381 |
| 149 | Gm20649-201 | Ctsd-201 | Ctsd | 0.999543245 | 3.13E-07 |
| 150 | Gm20649-201 | Ddr1-203 | Ddr1 | 0.999996348 | 2.00E-11 |
| 151 | Pex11b-204 | Zeb2-224 | Zeb2 | 0.963437121 | 0.001980827 |
| 152 | Pex11b-204 | Cttn-201 | Cttn | 0.993405101 | 6.51E-05 |
| 153 | Pex11b-204 | Cacna1a-213 | Cacna1a | 0.99047929 | 0.000135534 |
| 154 | Hsd17b12-202 | Frmpd4-206 | Frmpd4 | 1 | 0 |
| 155 | Hsd17b12-202 | Ddr1-212 | Ddr1 | 0.99697935 | 1.37E-05 |
| 156 | Scyl2-202 | Tcf19-202 | Tcf19 | 0.974318717 | 0.000980824 |
| 157 | Scyl2-202 | Sparc-208 | Sparc | 0.966975474 | 0.00161792 |
| 158 | Scyl2-202 | Zeb2-224 | Zeb2 | 0.985782194 | 0.000301782 |
| 159 | Scyl2-202 | Cttn-201 | Cttn | 0.99173097 | 0.000102283 |
| 160 | Scyl2-202 | Cacna1a-213 | Cacna1a | 0.971214275 | 0.001231001 |
| 161 | Scyl2-202 | Nlrp3-203 | Nlrp3 | 0.956710258 | 0.00277044 |
| 162 | Stab2-207 | Nlrp3-203 | Nlrp3 | 0.983612955 | 0.000400603 |
| 163 | Stab2-207 | Sprr1a-201 | Sprr1a | 0.992922325 | 7.50E-05 |
| 164 | Stab2-207 | Spp1-203 | Spp1 | 0.987975438 | 0.000216016 |
| 165 | Stab2-207 | Gal-202 | Gal | 0.985911012 | 0.000296351 |
| 166 | Stab2-207 | Slc6a4-201 | Slc6a4 | 0.994019068 | 5.36E-05 |
| 167 | 5530601H04Rik-213 | Ddc-210 | Ddc | 0.977811619 | 0.000733024 |
| 168 | Ptprs-221 | Ephb2-201 | Ephb2 | 0.988056424 | 0.000213122 |
| 169 | Ptprs-221 | Zeb2-221 | Zeb2 | 1 | 0 |
| 170 | Exosc10-206 | Frmpd4-206 | Frmpd4 | 0.997974278 | 6.15E-06 |
| 171 | Exosc10-206 | Ddr1-212 | Ddr1 | 0.993724477 | 5.89E-05 |
| 172 | Airn-206 | Sparc-208 | Sparc | 0.992346894 | 8.76E-05 |
| 173 | Airn-206 | Zeb2-224 | Zeb2 | 0.977468532 | 0.000755781 |
| 174 | Airn-206 | Tcf19-202 | Tcf19 | 0.988105665 | 0.000211371 |
| 175 | Airn-206 | Col11a2-211 | Col11a2 | 0.989349296 | 0.000169552 |
| 176 | Psmc6-202 | Ddc-210 | Ddc | -0.967323293 | 0.001584205 |
| 177 | TCONS_00228236 | Chrm1-201 | Chrm1 | 0.961560591 | 0.002187983 |
| 178 | Anxa11-204 | Cttn-201 | Cttn | 0.971968034 | 0.001167673 |
| 179 | Anxa11-204 | Cacna1a-213 | Cacna1a | 0.999274076 | 7.90E-07 |
| 180 | Pcdh15-230 | Mtdh-206 | Mtdh | 0.99990297 | 1.41E-08 |
| 181 | Pcdh15-230 | Cacna1a-202 | Cacna1a | 0.995857156 | 2.57E-05 |
| 182 | TCONS_00127833 | Il1rl1-201 | Il1rl1 | 0.955387779 | 0.002940981 |
| 183 | TCONS_00127833 | Spp1-203 | Spp1 | 0.950882228 | 0.003559584 |
| 184 | Fmc1-202 | Il1rl1-201 | Il1rl1 | 0.996764628 | 1.57E-05 |
| 185 | Pan3-223 | Csnk1e-213 | Csnk1e | 0.953936848 | 0.003133852 |
| 186 | Trp53i11-203 | Sparc-208 | Sparc | 0.979137726 | 0.000648312 |
| 187 | Trp53i11-203 | Zeb2-224 | Zeb2 | 0.957235354 | 0.002704118 |
| 188 | Trp53i11-203 | Tcf19-202 | Tcf19 | 0.972464396 | 0.001126875 |
| 189 | Trp53i11-203 | Col11a2-211 | Col11a2 | 0.997871674 | 6.79E-06 |
| 190 | 9430038I01Rik-205 | Mtdh-206 | Mtdh | 0.999997441 | 9.83E-12 |
| 191 | 9430038I01Rik-205 | Cacna1a-202 | Cacna1a | 0.997198994 | 1.18E-05 |
| 192 | TCONS_00123069 | Il1rl1-201 | Il1rl1 | 0.9710981 | 0.001240909 |
| 193 | TCONS_00123069 | Spp1-203 | Spp1 | 0.954410809 | 0.003070186 |
| 194 | Dnajc24-204 | Mapk8-202 | Mapk8 | 0.986039108 | 0.000290999 |
| 195 | Dnajc24-204 | Prkar1b-209 | Prkar1b | 0.970737021 | 0.001271954 |
| 196 | Synj2-207 | Frmpd4-206 | Frmpd4 | 0.999061526 | 1.32E-06 |
| 197 | Synj2-207 | Ddr1-212 | Ddr1 | 0.997725671 | 7.75E-06 |
| 198 | Ank2-216 | Vip-201 | Vip | 0.994326401 | 4.82E-05 |
| 199 | Ank2-216 | Stmn4-209 | Stmn4 | 0.991857381 | 9.92E-05 |
| 200 | Ank2-216 | Col11a2-211 | Col11a2 | 0.96732422 | 0.001584116 |
| 201 | Mfap4-203 | Il1rl1-201 | Il1rl1 | 0.994448932 | 4.61E-05 |
| 202 | Tmem87a-204 | Tcf19-202 | Tcf19 | 0.99595309 | 2.45E-05 |
| 203 | Tmem87a-204 | Sparc-208 | Sparc | 0.992738103 | 7.89E-05 |
| 204 | Tmem87a-204 | Zeb2-224 | Zeb2 | 0.999497466 | 3.79E-07 |
| 205 | Tmem87a-204 | Cttn-201 | Cttn | 0.973235041 | 0.001064958 |
| 206 | Tmem87a-204 | Nlrp3-203 | Nlrp3 | 0.969380917 | 0.001391939 |
| 207 | TCONS_00246824 | Grin2a-201 | Grin2a | 0.997021707 | 1.33E-05 |
| 208 | TCONS_00246824 | Ncam1-203 | Ncam1 | 0.997021707 | 1.33E-05 |
| 209 | TCONS_00246824 | Dlg2-219 | Dlg2 | 0.997021707 | 1.33E-05 |
| 210 | TCONS_00246824 | Grm1-202 | Grm1 | 0.997021707 | 1.33E-05 |
| 211 | TCONS_00246824 | Ano1-202 | Ano1 | 0.977500697 | 0.000753633 |
| 212 | TCONS_00246824 | Chrm1-201 | Chrm1 | 0.985414884 | 0.000317537 |
| 213 | TCONS_00246824 | Synpr-201 | Synpr | 0.997021707 | 1.33E-05 |
| 214 | Riok3-212 | Ddc-210 | Ddc | -0.954583558 | 0.003047141 |
| 215 | Riok3-212 | Cck-202 | Cck | 0.965276675 | 0.001787631 |
| 216 | Ppp2r2d-209 | Ctsd-201 | Ctsd | 0.968023159 | 0.001517429 |
| 217 | Ppp2r2d-209 | Ddr1-203 | Ddr1 | 0.966255186 | 0.001688856 |
| 218 | TCONS_00029142 | Sparc-208 | Sparc | 0.995084854 | 3.62E-05 |
| 219 | TCONS_00029142 | Nlrp3-203 | Nlrp3 | 0.951759228 | 0.003434626 |
| 220 | TCONS_00029142 | Zeb2-224 | Zeb2 | 0.982366509 | 0.000463669 |
| 221 | TCONS_00029142 | Tcf19-202 | Tcf19 | 0.991590361 | 0.000105786 |
| 222 | TCONS_00029142 | Col11a2-211 | Col11a2 | 0.985468018 | 0.000315233 |
| 223 | Ccnb1-206 | Il1rl1-201 | Il1rl1 | 0.951607605 | 0.003456073 |
| 224 | Ccnb1-206 | Vip-201 | Vip | 0.956521252 | 0.002794506 |
| 225 | TCONS_00058513 | Ddc-210 | Ddc | 0.997976237 | 6.14E-06 |
| 226 | TCONS_00257642 | Frmpd4-206 | Frmpd4 | 1 | 0 |
| 227 | TCONS_00257642 | Ddr1-212 | Ddr1 | 0.99697935 | 1.37E-05 |
| 228 | Fgr-202 | Nlrp3-203 | Nlrp3 | 0.953666337 | 0.003170478 |
| 229 | Fgr-202 | Sprr1a-201 | Sprr1a | 0.967632653 | 0.001554513 |
| 230 | Fgr-202 | Spp1-203 | Spp1 | 0.986810481 | 0.000259798 |
| 231 | Fgr-202 | Slc6a4-201 | Slc6a4 | 0.97817066 | 0.000709579 |
| 232 | Opcml-203 | Rps6ka3-207 | Rps6ka3 | 0.966720173 | 0.001642891 |
| 233 | TCONS_00146505 | Mapk8-202 | Mapk8 | 0.980628342 | 0.000559257 |
| 234 | Lrp8-219 | Ddc-210 | Ddc | 0.975124431 | 0.000920494 |
| 235 | Ninl-203 | Mapk8-202 | Mapk8 | 0.994496526 | 4.53E-05 |
| 236 | TCONS_00032016 | Il1rl1-201 | Il1rl1 | 0.996748798 | 1.58E-05 |
| 237 | Mcoln2-203 | Cck-202 | Cck | 0.985752955 | 0.000303022 |
| 238 | Cenpu-209 | Mtdh-206 | Mtdh | 0.972921289 | 0.001089957 |
| 239 | Cenpu-209 | Cck-202 | Cck | 0.962182312 | 0.002118223 |
| 240 | Cenpu-209 | Cacna1a-202 | Cacna1a | 0.95672629 | 0.002768403 |
| 241 | TCONS_00060374 | Prkar1b-209 | Prkar1b | 0.985004292 | 0.000335621 |
| 242 | TCONS_00132444 | Il1rl1-201 | Il1rl1 | 0.970830463 | 0.001263883 |
| 243 | TCONS_00123243 | Rps6ka3-207 | Rps6ka3 | 0.966998833 | 0.001615645 |
| 244 | TCONS_00077457 | Grin2a-201 | Grin2a | 0.99781782 | 7.14E-06 |
| 245 | TCONS_00077457 | Ncam1-203 | Ncam1 | 0.99781782 | 7.14E-06 |
| 246 | TCONS_00077457 | Synpr-201 | Synpr | 0.99781782 | 7.14E-06 |
| 247 | TCONS_00077457 | Dlg2-219 | Dlg2 | 0.99781782 | 7.14E-06 |
| 248 | TCONS_00077457 | Grm1-202 | Grm1 | 0.99781782 | 7.14E-06 |
| 249 | TCONS_00077457 | Ano1-202 | Ano1 | 0.993576344 | 6.18E-05 |
| 250 | TCONS_00077457 | Chrm1-201 | Chrm1 | 0.991148949 | 0.000117165 |
| 251 | Pank2-201 | Mapk8-202 | Mapk8 | 0.996155266 | 2.21E-05 |
| 252 | B230216N24Rik-201 | Cacna1a-213 | Cacna1a | 0.976768615 | 0.000803277 |
| 253 | B230216N24Rik-201 | Cttn-201 | Cttn | 0.967782272 | 0.001540252 |

**Supplementary Table 13 The list of DE lncRNAs targeting DE mRNAs in co-location**

| **No.** | **Chromosome** | **lncRNA_name** | **lncRNA_Strand** | **Target_mRNA_name** | **mRNA_Strand** | **Location** |
| --- | --- | --- | --- | --- | --- | --- |
| 1 | 6 | Cadps2-210 | - | Cadps2-201 | - | sense |
| 2 | 6 | Cadps2-210 | - | Cadps2-205 | - | sense |
| 3 | 4 | 4933424M12Rik-202 | + | Lrp8-204 | + | upstream |
| 4 | 4 | 4933424M12Rik-202 | + | Lrp8-201 | + | upstream |
| 5 | 1 | Gm28403-201 | - | Pign-201 | - | sense |
| 6 | 1 | Gm28403-201 | - | Relch-202 | + | upstream |
| 7 | X | TCONS_00296036 | - | Mid1-205 | + | antisense |
| 8 | X | TCONS_00296036 | - | Mid1-214 | + | antisense |
| 9 | 4 | Acer2-203 | + | Acer2-202 | + | sense |
| 10 | 3 | TCONS_00177463 | - | Mov10-207 | - | sense |
| 11 | 3 | TCONS_00177463 | - | Rhoc-202 | + | downstream |
| 12 | 15 | TCONS_00092230 | + | Ly6a-202 | - | downstream |
| 13 | 2 | Celf2-215 | - | Celf2-209 | - | sense |
| 14 | 7 | Gm15774-201 | - | Eef2k-209 | + | upstream |
| 15 | 8 | Nwd1-203 | + | Nwd1-204 | + | sense |
| 16 | 5 | Gm31831-202 | + | Gm5152-201 | - | upstream |
| 17 | 19 | Glis3-207 | - | Glis3-202 | - | sense |
| 18 | 18 | TCONS_00127351 | + | Rps14-207 | + | upstream |
| 19 | 8 | TCONS_00261438 | - | Adam32-201 | - | sense |
| 20 | 8 | TCONS_00261438 | - | Adam5-204 | - | upstream |
| 21 | 12 | Cinp-212 | - | Cinp-202 | - | sense |
| 22 | 4 | E130114P18Rik-205 | - | E130114P18Rik-201 | - | upstream |
| 23 | 14 | TCONS_00087827 | - | Esd-202 | + | upstream |
| 24 | 8 | Anxa10-203 | - | Anxa10-201 | - | sense |
| 25 | 4 | Lrp8-219 | + | Lrp8-204 | + | sense |
| 26 | 4 | Lrp8-219 | + | Lrp8-201 | + | sense |
| 27 | 5 | Fbxl13-203 | - | Fbxl13-201 | - | sense |
| 28 | 18 | TCONS_00124330 | + | Svil-211 | + | sense |
| 29 | 3 | Ank2-216 | - | Ank2-207 | - | sense |
| 30 | 2 | Ryr3-208 | - | Ryr3-201 | - | sense |
| 31 | 9 | Gm20275-201 | - | Senp8-207 | - | upstream |

**Supplementary Table 14 Pain specific PPI network associated with DEGs in the TG of CCI-ION mice**

| No. | **name A** | **Interaction** | **name B** |
| --- | --- | --- | --- |
| 1 | TRPV1 | Positive Regulation | VIP |
| 2 | FPR1 | Positive Regulation | ITGAM |
| 3 | CXCR2 | Binding | CXCL3 |
| 4 | GRM5 | Positive Regulation | PRKCG |
| 5 | OXT | Binding | GAL |
| 6 | MMP9 | Positive Regulation | IL1A |
| 7 | SLC6A4 | Regulation | S100A4 |
| 8 | IL8 | Binding | CXCR2 |
| 9 | NPY | Regulation | NPY1R |
| 10 | MMP2 | Binding | MMP9 |
| 11 | CALCA | Positive Regulation | Mpo |
| 12 | NGF | Binding | TNFRSF1B |
| 13 | VIP | Binding | FOS |
| 14 | MMP7 | Binding | SPP1 |
| 15 | NPY | Negative Regulation | CALCA |
| 16 | GRIN2B | Binding | MMP9 |
| 17 | PRKCG | Regulation | SCN10A |
| 18 | GAL | Positive Regulation | PRL |
| 19 | NEUROD1 | Positive Regulation | GAL |
| 20 | PRKCG | Regulation | ADCY2 |
| 21 | NTS | Positive Regulation | PRL |
| 22 | PRKCG | Regulation | TRPV1 |
| 23 | JUN | Positive Regulation | NPY |
| 24 | PRKCG | Positive Regulation | GRIN1 |
| 25 | SRC | Positive Regulation | GRIN2B |
| 26 | PRKCG | Positive Regulation | LOC750451 |
| 27 | GALR1 | Binding | GAL |
| 28 | EFNB1 | Positive Regulation | GRIN2B |
| 29 | BDNF | Regulation | GAP43 |
| 30 | GAL | Regulation | GH1 |
| 31 | EPHB1 | Binding | GRIN2B |
| 32 | DNM2 | Regulation | CGA |
| 33 | PRKCA | Binding | NRGN |
| 34 | CAMK2A | Binding | NRGN |
| 35 | NTS | Regulation | PPP1R1B |
| 36 | GRIN2B | Binding | EPHB1 |
| 37 | NTS | Negative Regulation | PRL |
| 38 | FPR1 | Positive Regulation | ELANE |
| 39 | GAL | Positive Regulation | GRIN1 |
| 40 | PRKCG | Regulation | TRPV4 |
| 41 | GHRL | Positive Regulation | NPY |
| 42 | SLC6A4 | Binding | Mir16-1 |
| 43 | CCK | Regulation | CCKBR |
| 44 | S100A8 | Binding | S100A9 |
| 45 | DLG2 | Positive Regulation | GRIN2A |
| 46 | GRIN2B | Binding | DLG2 |
| 47 | CALM1 | Binding | NRGN |
| 48 | GRIN2B | Binding | GRM5 |
| 49 | GRIN1 | Binding | GRIN2A |
| 50 | NGF | Regulation | VGF |
| 51 | JUN | Positive Regulation | VIP |
| 52 | TNF | Binding | TNFRSF1B |
| 53 | CSF3 | Regulation | SELL |
| 54 | PROK2 | Negative Regulation | IL4 |
| 55 | LIF | Regulation | GAL |
| 56 | MMP2 | Negative Regulation | TIMP2 |
| 57 | NOS1 | Negative Regulation | MMP9 |
| 58 | JUN | Regulation | NPY |
| 59 | TAC1 | Binding | GAL |
| 60 | MMP14 | Positive Regulation | MMP2 |
| 61 | DLG2 | Positive Regulation | GRIN2B |
| 62 | POMC | Regulation | ITGB2 |
| 63 | PROK2 | Positive Regulation | PRKCE |
| 64 | PENK | Positive Regulation | VIP |
| 65 | GRIN2B | Positive Regulation | Ltp |
| 66 | Fosl2 | Positive Regulation | PENK |
| 67 | JUN | Negative Regulation | VIP |
| 68 | NPY | Regulation | CALCA |
| 69 | PROK2 | Negative Regulation | IL10 |
| 70 | DLG2 | Negative Regulation | GRIN2A |
| 71 | Pbrgcsf1 | Positive Regulation | PROK2 |
| 72 | CXCR2 | Binding | CXCL13 |
| 73 | PRKCG | Positive Regulation | TRPV1 |
| 74 | CALCA | Binding | RAMP1 |
| 75 | TNF | Positive Regulation | MMP2 |
| 76 | IL6 | Positive Regulation | ATF3 |
| 77 | CD44 | Binding | MMP9 |
| 78 | GNRH1 | Regulation | CGA |
| 79 | PCSK2 | Positive Regulation | NPY |
| 80 | IL1A | Regulation | MMP2 |
| 81 | BDNF | Positive Regulation | VGF |
| 82 | PRKCG | Regulation | FOS |
| 83 | NTF3 | Negative Regulation | GAL |
| 84 | GRIN1 | Positive Regulation | GRIN2B |
| 85 | IL1A | Positive Regulation | MMP9 |
| 86 | BDNF | Positive Regulation | GRIN2A |
| 87 | gr | Positive Regulation | PRKCG |
| 88 | NPY | Regulation | FOS |
| 89 | VIP | Positive Regulation | IL6 |
| 90 | NRGN | Regulation | CAMK2A |
| 91 | PRKCG | Positive Regulation | SCN10A |
| 92 | VIP | Negative Regulation | TNFSF11 |
| 93 | POMC | Regulation | CGA |
| 94 | PROK2 | Positive Regulation | PROKR1 |
| 95 | Ins1 | Negative Regulation | NPY |
| 96 | ZIC2 | Regulation | SLC6A4 |
| 97 | BDNF | Regulation | VGF |
| 98 | NRGN | Positive Regulation | PRKCG |
| 99 | PROK2 | Regulation | TRPV1 |
| 100 | PRKCG | Regulation | CREB1 |
| 101 | MMP9 | Binding | TIMP1 |
| 102 | CALCA | Binding | VIP |
| 103 | EPHB1 | Positive Regulation | GRIN2B |
| 104 | VIP | Positive Regulation | PRL |
| 105 | CX3CL1 | Regulation | COL1A1 |

Note: Protein names with red color represent the protein encoded by up-regulated mRNAs in the TG of CCI-ION mice.

**Supplementary Table 15 The list of protein-encoding DEGs related to pain**

| **No.** | **Gene_name** | **log2FoldChange** | **up-donw** |
| --- | --- | --- | --- |
| 1 | Prok2 | 8.825572989 | up |
| 2 | Sprr1a | 6.868381327 | up |
| 3 | Vip | 6.556788083 | up |
| 4 | Npy | 6.100741385 | up |
| 5 | Slc6a4 | 5.807155507 | up |
| 6 | Mpo | 5.428941407 | up |
| 7 | Kcnj5 | 5.345790078 | up |
| 8 | Col9a1 | 5.218646831 | up |
| 9 | Lcn2 | 5.121696215 | up |
| 10 | Grin2b | 5.006954059 | up |
| 11 | Gpr151 | 4.968422756 | up |
| 12 | Trim10 | 4.577237108 | up |
| 13 | Prkcg | 4.376099861 | up |
| 14 | Gal | 4.240497941 | up |
| 15 | Grin2a | 3.873937258 | up |
| 16 | Fpr2 | 3.630325931 | up |
| 17 | Cckbr | 3.444141923 | up |
| 18 | Hdc | 3.371237853 | up |
| 19 | Atf3 | 3.371098128 | up |
| 20 | Mmp9 | 3.221639898 | up |
| 21 | Shisa9 | 2.714536184 | up |
| 22 | Anxa1 | 2.42378567 | up |
| 23 | Tubb6 | 2.355276624 | up |
| 24 | Nts | 1.952922673 | up |
| 25 | Cybb | 1.763811552 | up |
| 26 | Sox11 | 1.762305758 | up |
| 27 | Flrt3 | 1.719907243 | up |
| 28 | Ramp1 | 1.5278811 | up |
| 29 | Serpinb1a | 1.492110726 | up |
| 30 | Xdh | 1.398843717 | up |
| 31 | Tnfrsf1b | 1.340976963 | up |
| 32 | Cckar | 1.312746248 | up |
| 33 | Sema6a | 1.240487075 | up |
| 34 | Spp1 | 1.069391414 | up |
| 35 | Itpr1 | 1.057235834 | up |
| 36 | Bloc1s6 | 1.04818497 | up |
| 37 | Lyn | 1.017546478 | up |
| 38 | Gap43 | 1.013663991 | up |
| 39 | Nmu | -9.222377956 | down |

**Supplementary Table 16 DEGs encoding proteins related to NP, PEP, and LM**

| **No.** | **Gene_name** | **log2FoldChange** | **NP** | **PEP** | **LM** |
| --- | --- | --- | --- | --- | --- |
| 1 | Scpep1 | 1.12678245 | 1 | #N/A | #N/A |
| 2 | Tubb6 | 2.355276624 | 1 | 2 | 3 |
| 3 | Col1a1 | 2.174764851 | 1 | #N/A | #N/A |
| 4 | Il17ra | 1.703590612 | 1 | #N/A | #N/A |
| 5 | Actn3 | 2.568331961 | 1 | #N/A | #N/A |
| 6 | Csf1 | 1.079472071 | 1 | 2 | 3 |
| 7 | Gpx3 | 1.120282795 | 1 | #N/A | #N/A |
| 8 | Sema6a | 1.240487075 | 1 | 2 | 3 |
| 9 | Nts | 1.952922673 | 1 | 2 | 3 |
| 10 | Slc6a4 | 5.807155507 | 1 | 2 | #N/A |
| 11 | Slc6a19 | 1.041772732 | 1 | #N/A | #N/A |
| 12 | Fst | 2.282887485 | 1 | #N/A | #N/A |
| 13 | Cdhr1 | 1.03863152 | 1 | #N/A | #N/A |
| 14 | Shisa9 | 2.714536184 | 1 | #N/A | #N/A |
| 15 | Kcnk16 | 6.286690839 | 1 | #N/A | #N/A |
| 16 | Xdh | 1.398843717 | 1 | #N/A | #N/A |
| 17 | Anxa1 | 2.42378567 | 1 | #N/A | #N/A |
| 18 | Gal | 4.240497941 | 1 | 2 | 3 |
| 19 | Adam8 | 2.389178654 | 1 | 2 | 3 |
| 20 | Col3a1 | 1.371918934 | 1 | #N/A | #N/A |
| 21 | Ecel1 | 5.332427072 | 1 | #N/A | #N/A |
| 22 | Atf3 | 3.371098128 | 1 | 2 | 3 |
| 23 | Acvr1c | 3.812900482 | 1 | #N/A | #N/A |
| 24 | Car1 | 2.252301467 | #N/A | #N/A | 3 |
| 25 | Postn | 1.45657484 | 1 | #N/A | #N/A |
| 26 | S100a11 | 1.898184815 | 1 | #N/A | 3 |
| 27 | Mmp16 | 1.310904286 | 1 | 2 | #N/A |
| 28 | Slc44a5 | 1.488301811 | 1 | #N/A | #N/A |
| 29 | Tnc | 2.564509021 | 1 | #N/A | #N/A |
| 30 | Tnfrsf1b | 1.340976963 | 1 | 2 | #N/A |
| 31 | Cyp4b1 | 2.226673241 | #N/A | #N/A | 3 |
| 32 | Draxin | 2.432750129 | 1 | #N/A | #N/A |
| 33 | Fosl2 | 1.053809181 | 1 | #N/A | #N/A |
| 34 | Col1a2 | 1.531874533 | 1 | #N/A | #N/A |
| 35 | Akr1b8 | 1.416490029 | 1 | 2 | #N/A |
| 36 | Npy | 6.100741385 | 1 | #N/A | #N/A |
| 37 | Add2 | 1.145039344 | #N/A | 2 | #N/A |
| 38 | Itpr1 | 1.057235834 | 1 | #N/A | #N/A |
| 39 | Ptpro | 1.054182671 | 1 | #N/A | #N/A |
| 40 | Cckbr | 3.444141923 | 1 | 2 | #N/A |
| 41 | Elf4 | 1.592028184 | 1 | #N/A | #N/A |
| 42 | Lmo7 | 1.358745257 | 1 | 2 | 3 |
| 43 | Ano7 | 2.871192243 | 1 | #N/A | #N/A |
| 44 | Loxl2 | 1.505275199 | 1 | 2 | #N/A |
| 45 | Cd207 | 9.35599159 | 1 | 2 | #N/A |
| 46 | Cdcp1 | 3.078630019 | 1 | #N/A | #N/A |
| 47 | Krt17 | 9.35599159 | 1 | #N/A | #N/A |
| 48 | Sbno2 | 1.109893713 | 1 | #N/A | #N/A |
| 49 | Polr3g | 1.294524913 | 1 | 2 | #N/A |
| 50 | Vgf | 1.326720828 | 1 | #N/A | #N/A |
| 51 | Satb2 | 1.518147062 | 1 | #N/A | #N/A |
| 52 | Prc1 | 2.253089481 | 1 | 2 | #N/A |
| 53 | Lyn | 1.017546478 | 1 | #N/A | #N/A |
| 54 | Gpr151 | 4.968422756 | 1 | 2 | 3 |
| 55 | Wdr63 | 5.510145977 | 1 | #N/A | #N/A |
| 56 | Liph | 2.211940244 | 1 | #N/A | #N/A |
| 57 | Serpinb1a | 1.492110726 | 1 | #N/A | #N/A |
| 58 | Lrrc8d | -1.745980774 | 1 | 2 | #N/A |
| 59 | Gap43 | 1.013663991 | 1 | #N/A | #N/A |
| 60 | Lgals3 | 2.207636689 | 1 | 2 | 3 |
| 61 | Sprr1a | 6.868381327 | 1 | 2 | 3 |
| 62 | Flrt3 | 1.719907243 | 1 | 2 | 3 |
| 63 | Igfn1 | 5.579727207 | 1 | 2 | 3 |
| 64 | Hist1h1d | 2.000313211 | 1 | #N/A | #N/A |
| 65 | Glis3 | 1.885295356 | 1 | #N/A | #N/A |
| 66 | Mllt11 | 1.849959652 | 1 | #N/A | #N/A |
| 67 | Mettl7a2 | 5.857561801 | 1 | #N/A | #N/A |
| 68 | Sez6l | 1.690743383 | 1 | 2 | #N/A |
| 69 | Sox11 | 1.762305758 | 1 | 2 | 3 |
| 70 | Slfn9 | 2.332750502 | 1 | #N/A | #N/A |
| 71 | Serpinh1 | 1.381018837 | 1 | #N/A | #N/A |
| 72 | Trim10 | 4.577237108 | 1 | #N/A | #N/A |
| 73 | Pappa2 | 1.331749696 | 1 | #N/A | 3 |
| 74 | Col6a5 | 1.561473782 | 1 | #N/A | #N/A |
| 75 | Nnt | -16.4860298 | 1 | #N/A | #N/A |

Note: 1 represents nonpeptidergic (NP) nociceptor; 2 represents peptidergic (PEP) nociceptors; 3 represents large myelinated (LM) sensory neurons.
